# Late life metformin treatment limits cell survival and shortens lifespan by triggering an aging-associated failure of energy metabolism.

Lilia Espada<sup>1\*</sup>, Alexander Dakhovnik<sup>1\*</sup>, Prerana Chaudhari<sup>1\*</sup>, Asya Martirosyan<sup>1</sup>, Laura Miek<sup>2</sup>, Tetiana Poliezhhaieva<sup>1</sup>, Yvonne Schaub<sup>1</sup>, Ashish Nair<sup>1</sup>, Nadia Döring<sup>1</sup>, Norman Rahnis<sup>1</sup>, Oliver Werz<sup>2</sup>, Andreas Koeberle<sup>2,3</sup>, Joanna Kirkpatrick<sup>1</sup>, Alessandro Ori<sup>1</sup> and Maria A. Ermolaeva<sup>1,\*</sup>.

<sup>1</sup>- Leibniz Institute on Aging – Fritz Lipmann Institute (FLI), Beutenbergstrasse 11, 07745, Jena, Germany.

<sup>2</sup>- Institute of Pharmacy, Friedrich Schiller University Jena, Philosophenweg 14, 07743 Jena, Germany.

<sup>3</sup>- Michael Popp Research Institute, University of Innsbruck, Mitterweg 24, 6020 Innsbruck, Austria.

\*- Equal contribution

\*- Corresponding author: [maria.ermolaeva@leibniz-fli.de](mailto:maria.ermolaeva@leibniz-fli.de)

## Summary

The diabetes drug metformin is to be clinically tested in aged humans to achieve health span extension, but little is known about responses of old non-diabetic individuals to this drug. By *in vitro* and *in vivo* tests we found that metformin shortens life span and limits cell survival when provided in late life, contrary to its positive early life effects. Mechanistically, metformin exacerbates aging-associated mitochondrial dysfunction towards respiratory failure, aggravated by the inability of old cells to upregulate glycolysis in response to metformin, leading to ATP exhaustion. The beneficial dietary restriction effect of metformin on lipid reserves is abrogated in old animals, contributing to metabolic failure, while ectopic stabilization of cellular ATP levels alleviates late life metformin toxicity *in vitro* and *in vivo*. The toxicity is also suspended in nematodes carrying diabetes-like insulin receptor insufficiency and showing prolonged resilience to metabolic stress induced by metformin. In sum, we uncovered an alarming metabolic decay triggered by metformin in late life which may limit its benefits for non-diabetic elderly patients. Novel regulators of life extension by metformin are also presented.

## Keywords

Aging, metformin, mitochondrial dysfunction, glycolysis, dietary restriction, ATP exhaustion, protein kinase A

## Highlights

- Late life metformin treatment limits cell survival and shortens lifespan.

- 1 • Metformin exacerbates aging-associated mitochondrial dysfunction causing fatal  
2 ATP exhaustion.
- 3 • Old cells fail to upregulate glycolysis as a compensatory response to metformin.
- 4 • The dietary restriction (DR) mimetic response to metformin is abrogated in old  
5 animals.
- 6 • PKA and not AMPK pathway instigates the early life DR response to metformin.
- 7 • Stabilization of cellular ATP levels alleviates late life metformin toxicity *in vitro*  
8 and *in vivo*.

## 9 10 **Introduction**

11 Metformin is among the most frequently prescribed drugs worldwide and it is used to  
12 facilitate glucose catabolism in patients with impaired insulin signaling (diabetes type 2)  
13 (Salani et al., 2014). Metformin is thought to act by inhibiting mitochondrial respiration  
14 (Wheaton et al., 2014). Recently, metformin was tested for additional physiological  
15 effects and found to extend life span in animal models ranging from nematodes to mice  
16 (Martin-Montalvo et al., 2013; Onken and Driscoll, 2010). Extensive clinical use in  
17 humans enabled the collection and analysis of data on the longevity of human diabetes  
18 patients treated with metformin. The metformin-exposed diabetes cohort was found to  
19 be longer lived than untreated healthy subjects (Bannister et al., 2014), in line with  
20 potential life-prolonging properties of metformin.

21 Type 2 diabetes is an aging-associated disorder and many patients start  
22 metformin treatment in late life. Based on survival analysis of diabetes patients, it was  
23 proposed that life prolonging effects of metformin may extend also to metabolic-healthy  
24 elderly individuals. Considering moderate metformin side effects in diabetes and the  
25 potential healthy aging benefits, metformin has emerged as an attractive candidate to  
26 be clinically tested as the first prospective anti-aging drug in humans. A short term trial  
27 administering metformin to aged ( $\geq 65$  years old) pre-diabetic humans for a period of 6  
28 weeks had recently been completed and the data was reported (Kulkarni et al., 2018).  
29 While effects on pathways such as TOR and immune response were observed, no  
30 obvious physiological changes were detected due to short duration of the treatment,  
31 leaving long-term effects of metformin on aged healthy humans an open question. This  
32 question is however critical because non-diabetic elderly humans are anticipated to be  
33 the first recipients of the putative health span extension treatment with metformin.

34 Via literature research of animal studies providing evidence of longevity  
35 modulation by metformin, we discovered that the pro-survival effect of this drug was  
36 mostly studied in young animals or animals exposed to metformin from young  
37 adulthood. The few studies performed in older animals (56-60 week old mice, average  
38 lifespan 96 weeks; 8 day old nematodes, average lifespan 14-21 days), either failed to  
39 detect life extension by metformin (Alfaras et al., 2017; Anisimov et al., 2011) or  
40 revealed toxicity that was partially attributed to the metformin overdose (Cabreiro et al.,

1 2013; Martin-Montalvo et al., 2013; Thangthaeng et al., 2017). Strikingly, a dose of  
2 50mM metformin which triggered strongest lifespan extension in a seminal study  
3 performed in young *C. elegans*, was moderately toxic when given to middle aged  
4 (adulthood day 8) nematodes (Cabreiro et al., 2013; Onken and Driscoll, 2010). We  
5 thus came to a conclusion that the benefits and safety of metformin administration to old  
6 non-insulin resistant individuals were not sufficiently investigated, contrary to responses  
7 of diabetic patients.

8 Here we used genetic tests, metabolic measurements, stress reporter assays  
9 and omics analyses to detect age-specific effects of metformin in *C. elegans* and human  
10 primary cells. We found that metformin treatment initiated in late life shortens life span  
11 and limits cell survival by aggravating aging associated mitochondrial dysfunction  
12 towards respiratory failure. In addition to mitochondrial distortion, old cells failed to  
13 enhance the use of glycolysis in response to metformin leading to persistent ATP  
14 exhaustion. We found that interventions stabilizing cellular ATP levels, such as ATP  
15 repletion and TOR inhibitor rapamycin, alleviate late life metformin toxicity *in vitro* and *in*  
16 *vivo*. We also discovered that early age metformin treatment instigates a range of stress  
17 and metabolic adaptations which likely underlay longevity extension by metformin.  
18 Importantly, the induction of these favorable responses was strongly impaired in late  
19 life. Particularly, we show that early but not late life metformin treatment induces a lipid  
20 turnover response similar to dietary restriction (DR). We also found that this early life  
21 DR mimetic phenotype is instigated by the triglyceride lipolysis pathway regulated by  
22 the protein kinase A and not by AMP activated protein kinase (AMPK) pathway, as  
23 suggested previously. Subsequently, we showed that metformin treatment restricted to  
24 early adulthood is sufficient for life extension, strengthening the key role of early life  
25 stress and metabolic adaptations in longevity benefits of metformin. Finally, we  
26 demonstrate that *daf-2(e1370)* mutants, carrying diabetes-like insufficiency of the *C.*  
27 *elegans* insulin receptor, are resilient to late life metformin toxicity in comparison to age-  
28 matched wild type controls, due to improved capacity to sustain ATP synthesis during  
29 old age metformin exposure. Collectively, we uncovered an alarming capability of  
30 metformin to induce metabolic failure in non-insulin resistant old subjects which may  
31 limit its benefits for non-diabetic elderly humans.

## 32 33 **Results.**

34 ***Late life metformin treatment is detrimental for longevity.*** To address the outcomes  
35 of metformin treatment at different age, we treated young adult (3 days old, day 1 of  
36 adulthood), adult at the age of reproduction decline (day 4 of adulthood), middle aged  
37 (day 8 of adulthood) and old (day 10 of adulthood) wild type *C. elegans* worms with  
38 different doses of metformin – 10mM, 25mM and 50mM. 50mM metformin is the  
39 common dose used to induce lifespan extension in *C. elegans* while 10mM is the lowest  
40 dose linked to reproducible life extension in this model in previous reports (Cabreiro et

1 al., 2013; Onken and Driscoll, 2010; Pryor et al., 2019). We found that metformin  
2 treatment started at young age (days 1 and 4 of adulthood) extended lifespan of  
3 nematodes at all doses used (Figure 1A and Figure S1A). Within treatment initiated on  
4 day 8 of adulthood, the doses of 50mM and 25mM metformin reduced median lifespan  
5 but extended maximal lifespan consistent with previous observations (Cabreiro et al.,  
6 2013) while 10mM dose was longevity-extending with no detrimental effects (Figure  
7 S1B). Strikingly, on day 10 of adulthood metformin was toxic at all doses used with a  
8 large proportion of drug-exposed animals dying within first 24 hours of treatment (Figure  
9 1B). Our first experiments in nematodes thus revealed an evident age-dependent  
10 decrease in metformin tolerance which culminated in late life toxicity of all metformin  
11 doses tested, indicating possible safety risks of late life metformin administration.

12  
13 **Late life metformin toxicity is independent of microbiome.** To understand the  
14 mechanism of late life metformin toxicity, we first addressed known pathways regulating  
15 lifespan extension by this compound. The pro-longevity effect of metformin in young *C.*  
16 *elegans* nematodes was previously linked to changes of microbial metabolism induced  
17 by this drug (Cabreiro et al., 2013). To test if old age metformin toxicity relied on similar  
18 microbiome alterations we treated worms with metformin in the presence of living and  
19 UV-killed OP50 (metformin sensitive) and HT115 (metformin-resistant) *E. coli* strains.  
20 Old age metformin toxicity developed regardless of the bacterial viability and/or strain  
21 (Figure 1C and D) suggesting that late life metformin intolerance is independent of  
22 previously uncovered microbiome changes. Interestingly, the baseline survival of  
23 nematodes differed between UV killed OP50 and HT115 diets in line with recently  
24 reported dependence of nematode physiological behaviors on the bacterial source  
25 (Revtovich et al., 2019).

26  
27 **AMPK is not required for late life toxicity of metformin.** Another component  
28 essential for young age life-extending effect of metformin is AMP-activated protein  
29 kinase (AMPK); particularly metformin failed to promote longevity in nematodes lacking  
30 AMPK orthologue AAK-2 (Onken and Driscoll, 2010). In order to probe the requirement  
31 of AMPK for old age toxicity of metformin we treated young and old wild type and *aak-*  
32 *2(ok524)* mutant animals with this drug. Consistent with previous reports, early life  
33 metformin treatment was unable to induce lifespan extension in *aak-2* deficient worms  
34 (Figure 1E); at the same time late life metformin toxicity did develop in mutant animals,  
35 indicating that life shortening induced by metformin at old age is not executed by AMPK.

36  
37 **Metformin toxicity is triggered by mitochondrial impairments.** One of metformin's  
38 primary functions is to inhibit complex I of the mitochondrial electron transport chain  
39 (ETC), affecting mitochondrial membrane potential and ATP production (Andrzejewski  
40 et al., 2014; Cameron et al., 2018; Wheaton et al., 2014). Growth inhibition by

1 metformin was previously linked to impaired mitochondrial respiration in nematodes and  
2 mammalian cells (Wu et al., 2016). Additionally, the accumulation of damaged and  
3 dysfunctional mitochondria, which may enhance the negative impact of ETC complex I  
4 inhibitors on cell survival, is one of the best characterized hallmarks of aging (Bratic and  
5 Larsson, 2013; Bratic and Trifunovic, 2010; Cellerino and Ori, 2017; Sun et al., 2016;  
6 Taylor and Dillin, 2011).

7 Mitochondrial deterioration comparable to aging occurs prematurely in mutant  
8 animals, defective in mitochondrial biogenesis and quality control (Sun et al., 2016;  
9 Trifunovic et al., 2004). To test if metformin toxicity during aging (and metformin toxicity  
10 in general) is driven by accumulation of mitochondrial impairments, we obtained  
11 mutants harboring deficiencies of diverse mitochondrial homeostasis pathways:  
12 mitochondrial unfolded protein response (*atfs-1(gk3094)*) (Nargund et al., 2012),  
13 mitochondrial biogenesis (*skn-1(zj15)*) (Palikaras et al., 2015), mitochondrial respiration  
14 (*isp-1(qm150)*) (Feng et al., 2001) and mitochondrial protein quality control (*ubl-  
15 5(ok3389)*) (Benedetti et al., 2006), and treated these animals with metformin along with  
16 wild type counterparts. A combination of metformin with congenital mitochondrial  
17 impairments led to an early life onset of metformin toxicity in all mutant backgrounds  
18 tested (including normally long-lived *isp-1(qm150)* mutants) clearly linking metformin  
19 intolerance to elevated abundance of dysfunctional mitochondria (Figure 2A-C, Figure  
20 S2A). The same effect (premature onset of metformin toxicity at young age) was  
21 observed in nematodes and human primary cells incubated with mitochondrial  
22 uncoupling agent carbonyl cyanide-*p*-trifluoromethoxyphenylhydrazone (FCCP) along  
23 with metformin administration (Figure 2D-E and Figure S2B). Of note, congenital  
24 mitochondrial respiration defects were recently found to limit the life extending interplay  
25 between metformin and the microbiome (Pryor et al., 2019) in line with the key role of  
26 mitochondrial integrity in diverse longevity benefits of metformin. To test if mitophagy  
27 and/or mitochondrial unfolded protein response (UPR MT) - the protective pathways  
28 responding to mitochondrial failure and known to deteriorate during aging (Sun et al.,  
29 2016), were directly induced by metformin we measured the abundance of  
30 mitochondrial proteins and the expression of *hsp-6::gfp* transgene (UPR MT reporter) in  
31 young and old animals treated with this drug. At both ages metformin administration  
32 didn't lead to either elevated expression of GFP or reduction of mitochondrial protein  
33 levels (Figure S3A-C), indicating that mitophagy and UPR MT are not prominently  
34 triggered by metformin and likely play no role in immediate cellular adaptation to  
35 metformin-induced effects. Of note, lack of UPR MT induction by metformin has  
36 previously been reported by an independent group (De Haes et al., 2014). We thus  
37 show that the early onset of metformin toxicity in mitochondrial mutants is likely driven  
38 by the accumulation of mitochondrial damages prior to metformin administration,  
39 comparable to what occurs during aging.

40

1 **Metformin toxicity associates with ATP exhaustion and is alleviated by ATP**  
2 **repletion.** To measure direct age-specific effects of metformin on mitochondrial

3 performance and to test the conservation of our findings in humans, we analyzed the  
4 impact of metformin treatment on homeostasis of early passage (young) and late  
5 passage (old, replicative senescent) primary human skin fibroblasts. The replicative  
6 senescence model was chosen because of its high relevance for normal human aging  
7 as senescent cells accumulate in aging tissues. *In vitro* aging was performed according  
8 to standard procedures demonstrated to yield cells carrying key hallmarks of aging  
9 (Tigges et al., 2014), and aging-associated mitochondrial decline of late passage cells  
10 was verified by the Seahorse analysis (Figure 3C-D, Figure S4A and C). We found that,  
11 at high doses, metformin was toxic to both young and old cells but old cells (similar to  
12 old nematodes) showed a much stronger viability decline and succumbed to toxicity  
13 already at lower doses of metformin (Figure 3A-B). The oxygen consumption rate  
14 (OCR) measurements demonstrated a significant effect of metformin on basal  
15 respiration in young and old cells (Figure 3C, Figure S4A), while inhibition of  
16 mitochondrial ATP synthesis by metformin was stronger in old fibroblasts (Figure S4C).  
17 In addition, only old cells showed a decrease of maximal respiration in response to  
18 metformin (Figure 3D, Figure S4A) consistent with a stronger negative impact of this  
19 drug on mitochondria of old cells. Interestingly, the extracellular acidification rate  
20 (ECAR) was potently increased in young metformin treated fibroblasts (Figure 3E,  
21 Figure S4B) in line with their elevated reliance on glycolysis in response to  
22 mitochondrial insufficiency triggered by metformin. This adaptive increase of glycolysis  
23 was markedly reduced in old metformin exposed cells (Figure 3E, Figure S4B),  
24 depriving these cells, in combination with the stronger mitochondrial hindrance by  
25 metformin, of effective pathways of ATP synthesis. Subsequent determination of cellular  
26 ATP content indeed showed a stronger decline of ATP levels in old metformin treated  
27 cells (Figure 3F). We also detected a stronger distortion of the mitochondrial membrane  
28 potential in old compared to young metformin exposed fibroblasts (Figure 3G), in line  
29 with a more potent mitochondrial decline observed in old cells via oxygen consumption  
30 analysis.

31 We next measured the effect of metformin on organismal ATP content in  
32 nematodes. Metformin treatment of young animals didn't cause negative changes of  
33 systemic ATP levels (Figure 3H), consistent with reduced mitochondrial impairments  
34 and intact metabolic adaptability at young age. Strikingly, old animals showed a strong  
35 reduction of baseline ATP levels, compared to untreated young animals, followed by a  
36 further 76% decline of ATP content induced by metformin (Figure 3H, Table S2). These  
37 results are consistent with known mitochondrial deterioration and reduced energetics of  
38 old animals (and cells) (Brys et al., 2010; Drew et al., 2003), and suggest, along with  
39 above reported age-specific metabolic phenotypes, that metformin toxicity may be  
40 linked to a failure of old cells to maintain ATP synthesis during metformin treatment,

1 leading to a decline of ATP content down to levels incompatible with cell viability. To  
2 test this hypothesis we asked if ectopic ATP supplementation would rescue metformin  
3 toxicity. Providing ATP to animals is not feasible due to insufficient bioavailability upon  
4 oral supplementation (Arts et al., 2012), we were however able to supplement ATP to  
5 fibroblasts in culture using millimolar concentrations as previously described (1978).  
6 Ectopic ATP repletion alleviated cell death, ATP exhaustion and loss of mitochondrial  
7 membrane potential induced by metformin (Figure 3I-J, Figure S5A-D) and by another  
8 complex I inhibitor rotenone (Figure S6A-C) linking viability loss upon treatment with  
9 ETC complex I inhibitors to alterations in energy homeostasis. The rescue of the  
10 mitochondrial membrane potential by ATP repletion was consistent with the previously  
11 reported ability of the mitochondrial ATP synthase to restore membrane potential under  
12 conditions of respiratory failure by consuming ATP (Chinopoulos and Adam-Vizi, 2010).

13  
14 ***Metformin toxicity is suspended in nematodes carrying insulin receptor***  
15 ***insufficiency.*** Because metformin intolerance, comparable to our findings, has not  
16 been reported in type 2 diabetes patients receiving treatment in late life, we decided to  
17 test the old age metformin response of nematodes lacking functional insulin receptor (a  
18 molecular mimetic of insulin resistance in type 2 diabetes). For that we chose a well  
19 characterized *daf-2(e1370)* strain which carries a temperature sensitive mutation of the  
20 *C. elegans* IGF-1/Insulin receptor orthologue DAF-2 (Dorman et al., 1995). At a  
21 restrictive temperature of 20°C *daf-2(e1370)* mutants exhibit partial loss of insulin  
22 receptor function leading to a variety of phenotypes, partially comparable to diabetic  
23 patients (such as enhanced fat deposition) (Kimura et al., 1997; Tissenbaum and  
24 Ruvkun, 1998). We next measured survival of *daf-2(e1370)* and wild type nematodes  
25 treated with metformin on day 10 of adulthood (AD10) and observed a striking resilience  
26 of the mutants to metformin killing at this age (Figure 4A). Systemic ATP measurements  
27 revealed a moderate reduction of baseline ATP synthesis in young *daf-2(e1370)*  
28 mutants (Figure 4C) consistent with previous reports (Brys et al., 2010; Palikaras et al.,  
29 2015). Interestingly neither aging nor metformin had a negative impact on ATP levels in  
30 AD10 *daf-2(e1370)* animals, contrary to the response of wild type controls (Figure 4C),  
31 associating the resilience of the mutants to metformin toxicity with their ability to sustain  
32 ATP synthesis during late life metformin treatment. Of note, the enhanced competence  
33 of *daf-2(e1370)* mutants in ATP synthesis during late life is also consistent with previous  
34 reports (Brys et al., 2010; Palikaras et al., 2015). Importantly, the resistance of *daf-*  
35 *2(e1370)* animals to metformin wasn't infinite and mutant nematodes exposed to the  
36 drug on adulthood day 21 (AD21) showed levels of metformin toxicity comparable to  
37 AD10 wild type controls (Figure S7A), indicating that the insulin receptor itself is not  
38 required for the induction of late life metformin toxicity. In summary, these data reiterate  
39 the key role of ATP exhaustion in late life metformin toxicity and indicate that inhibition

1 of insulin receptor signaling, comparable to insulin resistance in diabetes, provides  
2 extended protection from late life metformin intolerance.

3  
4 ***Metformin resilience of insulin receptor mutants is not due to their slower rate of***  
5 ***aging.*** The *daf-2(e1370)* mutants are known to be long-lived in comparison to wild type  
6 animals (Dorman et al., 1995; Kimura et al., 1997; Tissenbaum and Ruvkun, 1998). To  
7 ensure that the prolonged metformin resilience of *daf-2(e1370)* animals is not a simple  
8 consequence of their slower rate of aging, we selected a different comparably long-lived  
9 strain - germline-deprived *glp-1(e2141)* mutants (Lapierre et al., 2011), and treated  
10 these animals with metformin on day 10 of adulthood (AD10). Unlike *daf-2(e1370)*  
11 nematodes, *glp-1(e2141)* worms succumbed to AD10 metformin killing similar to wild  
12 type controls (Figure 4B). They also showed both aging-triggered and metformin-  
13 aggravated declines of ATP levels, unlike AD10 *daf-2(e1370)* mutants and similar to  
14 wild type controls (Figure 4C). We thus determined that the ability to sustain ATP  
15 synthesis in late life and the corresponding metformin resilience are not common  
16 phenotypes of all long-lived mutants but rather a specific feature of insulin receptor  
17 deficient animals.

18  
19 ***Metformin resilience of insulin receptor mutants depends on sustained ATP***  
20 ***synthesis in late life regulated by DAF-16/FOXO.*** The exact mechanism behind the  
21 enhanced metabolic competence of *daf-2(e1370)* mutants in late life remains to be  
22 elucidated. However, similar to most of *daf-2(e1370)* beneficial phenotypes, this  
23 capacity may depend on the FOXO transcription factor DAF-16 (Kenyon, 2011;  
24 Palikaras et al., 2015). Consistently, *daf-2(e1370); daf-16(mu86)* double mutants didn't  
25 show metformin resilience on adulthood day 10, unlike *daf-2(e1370)* single mutants and  
26 similar to wild type controls (Figure S7B). The double mutants also showed a clear  
27 decline of ATP synthesis upon AD10 metformin treatment (Figure S7C) in line with the  
28 requirement of DAF-16 for metabolic resilience of the *daf-2(e1370)* genetic background.  
29 Because DAF-16 is an important mediator of multiple stress adaptations (Kenyon,  
30 2011), we tested if the response to metformin required DAF-16 directly by measuring  
31 nuclear translocation of the DAF-16::GFP fusion protein during metformin or heat shock  
32 treatment (used as positive control). While DAF-16 was clearly translocating into the  
33 nucleus in response to heat stress, little translocation (above negative control values)  
34 could be observed in the course of metformin treatment regardless of age (Figure S8A-  
35 C), suggesting that metformin resilience of *daf-2(e1370)* mutants is not driven by the  
36 direct involvement of DAF-16 in stress adaptations during metformin treatment.

37 The capability of *daf-2(e1370)* animals to sustain stable ATP synthesis at old age  
38 has previously been linked to elevated mitochondrial turnover induced by life-long  
39 subtle metabolic stress, leading to improved mitochondrial quality in late life (Brys et  
40 al., 2010; Palikaras et al., 2015). Our proteomics measurements indeed revealed



1 reduced baseline levels of mitochondrial proteins in *daf-2(e1370)* mutants compared to  
2 wild type animals (Figure S7D) consistent with elevated mitochondrial turnover.  
3 Interestingly, mitochondrial protein levels of *daf-2(e1370); daf-16(mu86)* double mutants  
4 were similar to values observed in wild type animals (Figure S7D), suggesting that  
5 mitochondrial replenishing triggered by insulin receptor deficiency is inhibited in the  
6 absence of DAF-16. Consistent with the key role of DAF-16 in supporting metabolic  
7 homeostasis of *daf-2(e1370)* mutants, the *daf-2(e1370); daf-16(mu86)* double mutants  
8 demonstrated strong impairments of baseline ATP synthesis already at young age  
9 (Figure S7C).

10  
11 ***Metformin rapidly activates diverse longevity assurance pathways in young but***  
12 ***not old animals.*** To test if other metformin responses, in addition to ATP synthesis,  
13 become altered in late life we performed an unbiased proteomics analysis of animals  
14 treated with metformin on days 1 and 10 of adulthood for 24 and 48 hours, and  
15 compared these to age- and time point-matched untreated controls. The abundance of  
16 only a restricted proportion of protein groups was affected by metformin at both ages  
17 and at both times of treatment (seen by comparing numbers of altered proteins (circled)  
18 and non-altered proteins (outer box) in Figures 5A and S9A), highlighting the specificity  
19 of the response elicited by the drug treatment. By comparing the protein expression  
20 profiles obtained (4572 protein groups were quantified in total, Table S3), we  
21 determined that global responses to metformin at young and old age were largely  
22 distinct, as indicated by a limited overlap between commonly affected proteins at both  
23 24 and 48 hours of treatment (Figure 5A and S9A), and a modest correlation between  
24 induced protein changes (Figure 5B and S9B). Interestingly, the similarity between  
25 young and old responses was stronger at 48 hours of treatment, which could be  
26 explained either by a delay of old animals in responding to the drug or by an enrichment  
27 of the 48h old age metformin-exposed sample with animals that were most competent in  
28 their adaptation to metformin treatment (based on our survival analyses a significant  
29 proportion of metformin sensitive old animals died between 24 and 48h of treatment).

30 By analyzing pathways regulated by metformin at distinct age points, we  
31 detected a rapid activation of adaptive stress responses and longevity assurance  
32 pathways such as downregulation of the ribosome (MacInnes, 2016) and induction of  
33 oxidative stress response (Honda and Honda, 1999), immune response (Xia et al.,  
34 2019) and heat stress response (Baldi et al., 2017) in young animals (Figure 5C-E and  
35 S9C). General autophagy (Hansen et al., 2018) was also comparably regulated albeit to  
36 a smaller extent (Figure S9D). These data are consistent with previous studies  
37 suggesting that metformin extends life span by inducing stress adaptations such as  
38 oxidative stress response (De Haes et al., 2014; Onken and Driscoll, 2010). Unlike  
39 previous reports, however, our data demonstrates for the first time that metformin  
40 simultaneously triggers a complex array of diverse stress responses which likely all

1 contribute to life extension by this drug. Strikingly, the induction of stress adaptations by  
2 metformin was either inhibited or delayed in old animals (Figure 5C-E, Figure S9C-D)  
3 suggesting that, in addition to metformin-triggered ATP exhaustion, also the longevity  
4 assurance component of the metformin response is impaired in late life.

5 To investigate the age specificity of metformin-triggered stress responses by an  
6 independent method, we measured the induction of general autophagy by metformin in  
7 a transgenic strain expressing the LGG-1::mCherry fusion protein (Gosai et al., 2010).  
8 LGG-1 is a *C. elegans* LC3 orthologue that gets recruited to autophagosome  
9 membranes during the autophagy process, giving rise (in a reporter setting) to distinct  
10 puncta which can be quantified microscopically (Figure S10A). Autophagy was chosen  
11 for the validation test because of its known antagonistic effect on longevity depending  
12 on age (Wilhelm et al., 2017) and mitochondrial integrity (Zhou et al., 2019). By treating  
13 young and old transgenic animals with metformin, we could indeed observe a  
14 substantial induction of autophagosome formation in young but not old metformin-  
15 exposed animals (Figure S10B-C) with effects size comparable to the proteomics data  
16 (Figure S9D). Interestingly, the absolute numbers of autophagy puncta in control  
17 untreated animals were significantly higher at old age (Figure S10D-E) consistent with  
18 the previously observed inhibition of autophagy flux during late life (Wilhelm et al.,  
19 2017). The specificity of observed puncta to the autophagy process was confirmed by  
20 exposing transgenic animals to RNAi against key autophagy mediator beclin 1 (*bec-1*)  
21 (Figure S10F).

22 In summary, we uncovered that metformin treatment exerts an array of stress  
23 adaptation responses in young animals while old animals fail to activate these signals to  
24 a comparable extent in line with previous hints of impaired stress resilience at old age  
25 (Haigis and Yankner, 2010). To probe the contribution of early life adaptive events to  
26 the pro-longevity effect of metformin we exposed nematodes to the drug during early  
27 adulthood and indeed found that metformin treatment restricted to young age is  
28 sufficient to confer *in vivo* life span benefits (Figure S10G).

29  
30 ***Old age specific metformin response is enriched in distinct mediators of lipid***  
31 ***metabolism.*** We next screened the proteomics data for pathways activated by  
32 metformin predominantly in old animals. We found that peroxisomal components along  
33 with mitochondrial and peroxisomal enzymes implicated in fatty acid  $\beta$ -oxidation (such  
34 as *acs-1*, *acs-2*, *acox-2*) (Zhang et al., 2011) were upregulated in old stronger than in  
35 young animals (Figure 5F, H). Also proteins associated with lipid droplets, serving as  
36 key lipid storage units in *C. elegans*, (vitellogenins, dehydrogenases) (Vrablik et al.,  
37 2015; Zhang et al., 2012) were upregulated in old while they were downregulated in  
38 young metformin treated animals (Figure 5G, Figure S9E). In addition, ribosomal  
39 components found to be part of the lipid droplet proteome (Vrablik et al., 2015; Zhang et  
40 al., 2012) were downregulated in young but not in old metformin exposed nematodes

1 (Figure S9C). Collectively, our data indicated that metformin treatment leads to an  
2 increase in peroxisomal content, which is stronger at old compared to young age, while  
3 lipid droplet components are downregulated in young and upregulated in old animals.  
4 Interestingly, the downregulation of lipid droplets and the upregulation of peroxisomes  
5 by metformin in young animals were recently reported by an independent study (Pryor  
6 et al., 2019) which however didn't address the age specificity of these phenotypes.

7  
8 ***Metformin treatment leads to distinct lipid turnover responses in young and old***  
9 ***animals.*** Because proteomics analysis revealed the age-specific regulation of lipid  
10 turnover mediators by metformin, we asked if metformin affects systemic lipid deposition  
11 in an age-dependent manner. By performing Oil Red O whole body lipid staining in *C.*  
12 *elegans* we detected a significant decline of lipid levels in young animals exposed to  
13 metformin while no such decline could be observed in old animals (Figure 6A, Figure  
14 S12A). Importantly, a reduction of whole body lipid content by metformin is consistent  
15 with its role as a dietary restriction (DR) mimetic (Onken and Driscoll, 2010) which was  
16 recently found to be essential for the longevity extension by this drug (Pryor et al.,  
17 2019). Our data in old animals demonstrates that this beneficial DR effect of metformin  
18 is abolished during aging.

19 We next performed lipidomics analysis by mass spectrometry in young and old  
20 nematodes exposed to metformin to characterize the age-specific lipid turnover  
21 phenotype induced by this drug in a greater detail. By comparing lipid abundancies in  
22 untreated young and old worms we observed a significant exhaustion of phospholipids  
23 (PLs), free fatty acids (FFAs), lysophospholipids and polyunsaturated fatty acid (PUFA)-  
24 rich lysophospholipids which occurred due to aging (Figure S13A-B and Table S4). Of  
25 note, these observations are consistent with a recent lipidomics report characterizing  
26 basal lipid changes in aging *C. elegans* (Gao et al., 2017). Interestingly, the levels of  
27 triglycerides (TAGs) were markedly increased in old animals compared to young worms  
28 (Figure 6B, D and Table S4), in contrast to other lipid classes measured and  
29 reminiscent of the aberrant accumulation of triglycerides observed in human aging  
30 (Cree et al., 2004) and upon mitochondrial insufficiency (Vankoningsloo et al., 2006).  
31 Importantly, the accumulation of TAGs during aging correlated with the elevated whole  
32 body lipid content detected by Oil Red O staining in old untreated nematodes (Figure  
33 6A).

34 We next compared lipid responses to metformin in young and old animals and  
35 found that in young nematodes metformin lowered the abundance of diverse lipid  
36 subclasses including free fatty acids and triglycerides, consistent with the DR-like  
37 phenotype (Figure 6B-D, Figure S13C-E, Table S4). Strikingly, the levels of  
38 triglycerides, including TAGs containing highly unsaturated PUFAs, were further  
39 elevated in old metformin exposed animals (Figure 6B, D and Figure S13E), contrary to  
40 the response of young nematodes and consistent with the loss of the metformin DR

1 effect at old age. The opposite changes in triglyceride content in young and old animals  
2 exposed to metformin were also consistent with the opposite dynamics of lipid droplet-  
3 associated proteins observed in these animals by proteomics (Figure 5G, Figure S9C,  
4 E): triglycerides are the key components of lipid droplets, and lipid droplet turnover  
5 supports the engagement of TAGs during fasting and DR (Lee et al., 2014). Along with  
6 the increase in triglycerides and highly unsaturated PUFA-rich triglycerides (Figure  
7 S13E), metformin triggered a reduction of long-chain and PUFA-rich lysophospholipids  
8 and free fatty acids in old animals (Figure S14A-C and Table S4), similar to aberrant  
9 lipid rearrangements observed during persistent metabolic stress (Markel et al., 1985;  
10 Nguyen et al., 2017; Steinhäuser et al., 2018) and in line with the differential abundance  
11 of distinct lipid turnover mediators detected in metformin-exposed old nematodes by  
12 proteomics. In summary, old animals failed to develop a DR mimetic lipid turnover  
13 phenotype in response to metformin, contrary to young worms, and rather showed an  
14 exacerbation of pre-existing aging-associated lipid abnormalities upon metformin  
15 treatment. Given the recently reported key importance of lipid turnover, resembling DR,  
16 for life extension by metformin (Pryor et al., 2019), the reversal of this DR response  
17 during aging likely contributes to the lack of metformin benefits in late life.

18  
19 ***Metformin-triggered lipid changes are driven by distinct mechanisms at young***  
20 ***and old age.*** Previous studies implicated AMPK in lipid changes linked to aging and  
21 mitochondrial alterations (Gao et al., 2017; Weir et al., 2017). AMPK has also been  
22 linked to a reduction of de-novo lipid synthesis in metformin-exposed hepatocytes,  
23 muscle and liver (Boudaba et al., 2018; Collier et al., 2006; Fullerton et al., 2013; Zang  
24 et al., 2004). We next asked if lipid transformations triggered by metformin at young or  
25 old age were mediated by AMPK. Wild type and AMPK (AAK-2) deficient animals were  
26 treated with metformin at young and old age followed by Oil Red O whole body lipid  
27 staining. We found that old AMPK deficient animals accumulated additional lipids in  
28 response to metformin while no such changes were seen in wild type nematodes  
29 (Figure S11A, S12C), in line with an important role of AMPK in mitigating the aberrant  
30 lipid accumulation during late life metabolic stress. But curiously, young AMPK deficient  
31 nematodes demonstrated an even stronger lipid reduction in response to metformin  
32 compared to wild type controls (Figure 6E, S11C and S12B) indicating that AMPK is not  
33 the primary instigator of early life metformin DR response but rather plays an inhibitory  
34 role in this process.

35 Because the age-specific lipid turnover induced by metformin affected  
36 triglycerides stronger than other lipid species, we next asked if the triglyceride lipolysis  
37 pathway regulated by protein kinase A (PKA) in response to fasting (Lee et al., 2014) is  
38 the principle driver of early life metformin effect on lipid reserves. By performing Oil Red  
39 O whole body lipid staining in control nematodes and in nematodes harboring RNAi  
40 knock down of *kin-1* (the *C. elegans* orthologue of PKA) or *atgl-1* (the orthologue of the

1 adipose triglyceride lipase, the key effector of the PKA lipolysis pathway) we found that  
2 inactivation of the PKA pathway indeed suppressed the DR-like lipid turnover induced  
3 by metformin in early life (Figure 6F, S11B and S12D-E). Interestingly, AMPK was  
4 previously shown to directly modulate the activity of ATGL-1 towards a more moderate  
5 turnover of triglyceride reserves, and this inhibitory capacity of AMPK was found to be  
6 essential for the extended longevity of long-lived *C. elegans* dauer larvae (Narbonne  
7 and Roy, 2009). In our tests we observed a stronger decline of lipid content in young  
8 AMPK deficient animals exposed to metformin compared to wild type controls (Figure  
9 S11C), it is thus feasible that the modulatory effect of AMPK on the PKA lipolysis  
10 pathway is behind the known essential role of AMPK in longevity extension by  
11 metformin (Onken and Driscoll, 2010), by preventing the untimely lipid exhaustion  
12 during early life metformin exposure. Importantly, young animals exposed to metformin  
13 in the presence of HT115 *E. coli* (the RNAi vehicle), a condition previously found to be  
14 deprived of metformin life extension similar to AMPK mutants (Cabreiro et al., 2013),  
15 showed markedly enhanced loss of lipids at 24h of drug treatment compared to OP50  
16 *E. coli* control and similar to AMPK-deficient animals (Figure S11D and S12D-E, empty  
17 vector control); this excessive loss of lipids was clearly prevented by the inactivation of  
18 ATGL-1, the key triglyceride lipase regulated by AMPK (Kim et al., 2016)(Figure S11D  
19 and S12D). Our data thus supports the model of metformin life extension where  
20 prevention of untimely and unhealthy lipid loss is as important for improved longevity as  
21 the induction of the beneficial DR response, previously linked to metformin induced life  
22 prolongation (Onken and Driscoll, 2010; Pryor et al., 2019). We also show that AMPK  
23 has age-specific roles in metformin-triggered lipid turnover and that the PKA and not  
24 AMPK pathway instigates the DR-like lipid utilization response in young metformin  
25 treated animals.

26  
27 ***ATP exhaustion and late life metformin toxicity are alleviated by in vivo***  
28 ***rapamycin co-treatment.*** Because appropriate lipid turnover is essential for supporting  
29 the mitochondria with metabolites required for effective ATP synthesis, our molecular  
30 analysis of key metformin-modulated pathways further supported the primary role of  
31 ATP exhaustion in cellular deterioration triggered by metformin in late life. We next  
32 decided to test if accessible *in vivo* interventions which stabilize cellular ATP levels  
33 alleviate late life metformin toxicity. One known intervention that stabilizes ATP content  
34 under conditions of mitochondrial dysfunction and carbon starvation is TOR inhibitor  
35 rapamycin (Thomsson et al., 2005; Zheng et al., 2016). Interestingly TOR inhibition was  
36 previously found to be essential to support nematode development and cell survival  
37 upon treatment with toxic high doses of metformin (Wu et al., 2016). Previous studies  
38 also indicated that rapamycin co-exposure enhances longevity benefits of early life  
39 metformin treatment (Strong et al., 2016). We next exposed pre-senescent fibroblasts to  
40 metformin in the presence or absence of rapamycin and observed a clear alleviation of

1 metformin toxicity in rapamycin pre-treated cells (Figure 7A and S15A-B) accompanied  
2 by blunted ATP exhaustion and reduced loss of mitochondrial membrane potential in  
3 these cells (Figure 7B-C and S15C-D). To test if rapamycin co-exposure protects  
4 against late life metformin toxicity also *in vivo*, we pre-treated nematodes with  
5 rapamycin from adulthood day 8 (AD8) followed by metformin treatment on adulthood  
6 day 10. Consistent with our cell culture observations, rapamycin co-treatment  
7 significantly alleviated late life metformin intolerance as seen by improvement of both  
8 median and maximal life spans in rapamycin/metformin co-exposed animals (Figure  
9 7D). These *in vivo* findings confirm the decisive role of ATP exhaustion in late life  
10 metformin toxicity and suggest that interventions capable of stabilizing cellular ATP  
11 content, such as rapamycin administration, could be utilized for prevention of metformin  
12 intolerance during aging. The incomplete reversal of late life metformin toxicity by  
13 rapamycin is in line with the limited capacity of this drug to preserve cellular ATP levels.

## 14 **Discussion.**

15 This study, performed in nematodes and human cells, demonstrates for the first time  
16 that metformin treatment initiated in late life triggers a range of aging-specific metabolic  
17 failures culminating in fatal ATP exhaustion (Figure S16). We show that ETC complex I  
18 inhibitor rotenone acts comparably to metformin in inducing aging-associated metabolic  
19 decline, suggesting that metformin promotes metabolic deterioration in late life via its  
20 known capacity to directly inhibit oxidative phosphorylation (Wheaton et al., 2014). The  
21 premature induction of mitochondrial impairments, comparable to aging-induced  
22 distortions of this organelle, was sufficient to trigger metformin toxicity independently of  
23 age, in line with the primary role of aging-associated mitochondrial dysfunction in late  
24 life adverse effects of metformin. The stronger negative impact of metformin on  
25 mitochondrial integrity in old cells was also indeed detected. We demonstrate that, in  
26 addition to mitochondrial alterations, the adverse effect of metformin on energy  
27 metabolism in old cells is exacerbated by the reduced capacity of these cells to  
28 upregulate glycolysis in response to metformin and by the lack of a DR mimetic lipid  
29 turnover response in old metformin exposed animals. Consistently, old but not young  
30 animals experience persistent ATP exhaustion in response to metformin which limits  
31 their cell viability and contributes to life span shortening in these animals.

32 By gene inactivation tests we demonstrated that AMPK mitigates the aberrant  
33 lipid accumulation in old metformin exposed animals, consistent with the known function  
34 of this kinase in restricting lipid synthesis in response to metformin (Zang et al., 2004).  
35 Strikingly, the young age dietary restriction (DR) effect of metformin was not inhibited  
36 but enhanced by the loss of AMPK gene function, contrary to the previously anticipated  
37 activator role of AMPK in this longevity-assurance response. Subsequently, we found  
38 that the DR-like effect of metformin in early life is mediated by the protein kinase A and  
39 its downstream triglyceride lipase ATGL-1, similar to the lipid turnover phenotype  
40

1 induced by fasting (Lee et al., 2014). Interestingly, AMPK is known to have an inhibitory  
2 effect on ATGL-1, preventing the excessive lipid exhaustion by this lipase with critical  
3 effects on longevity (Narbonne and Roy, 2009). Our data supports the model where  
4 AMPK has a similar inhibitory function in the early life DR response to metformin (Figure  
5 S16), likely explaining the well documented importance of AMPK for life-long metformin  
6 benefits. In summary, we discovered a novel previously unknown relationship between  
7 metformin and the protein kinase A pathway in mediating the beneficial DR effect of  
8 metformin. We also obtained evidence of the previously unexplored inhibitory role of  
9 AMPK in this process, which may contribute to the key protective function of AMPK in  
10 distinct metabolic stress scenarios such as metformin exposure.

11 Because metformin doesn't show the toxicity comparable to our findings in  
12 elderly diabetes patients, we conducted metformin tests in old *daf-2(e1370)* mutant  
13 nematodes carrying the diabetes-like insufficiency of the *C. elegans* insulin receptor.  
14 The insulin receptor mutants indeed showed prolonged resilience to late life metformin  
15 toxicity, linked with their ability to sustain stable ATP synthesis during late life metformin  
16 exposure. This capacity is regulated by the DAF-16/FOXO stress response pathway  
17 and likely represents the adaptation of the mutants to persistent metabolic stress, prior  
18 to metformin treatment. Our data thus indicates that strong metabolic differences  
19 between non-diabetic and diabetic individuals may significantly hinder the extrapolation  
20 of metformin benefits observed in diabetes patients, including life span extension at old  
21 age, to healthy elderly humans.

22 Finally, we found that metformin treatment triggers a plethora of adaptive stress  
23 responses in young animals while old nematodes failed to activate these pathways to a  
24 similar extent. These data are consistent with the previously proposed key role of stress  
25 and metabolic adaptations in life extension by metformin (De Haes et al., 2014; Onken  
26 and Driscoll, 2010). The inferior induction of longevity assurance pathways, including  
27 the DR response, by metformin in old animals indicates that health extension properties  
28 of this drug may be reduced at old age in addition to metabolic failures triggered by  
29 metformin in non-diabetic old subjects. In line with the key role of early life adaptations  
30 in metformin-induced longevity extension, we found that metformin treatment restricted  
31 to early adulthood is sufficient to prolong survival (Figure S10G).

32 Collectively, we identified important age-specific effects of metformin which may  
33 limit therapeutic benefits of this drug for non-diabetic elderly patients. In fact,  
34 observations consistent with a reversal of metformin benefits at old age (Alfaras et al.,  
35 2017) and a negative impact of late life metformin exposure on adaptive, motor and  
36 cognitive abilities (Konopka et al., 2019; Thangthaeng et al., 2017) have recently  
37 emerged from descriptive studies performed in mice and humans. In this context, our  
38 work provides for the first time the definite molecular and genetic evidence linking age-  
39 specific adverse effects of metformin to reduced longevity assurance capacity and  
40 impaired metabolic plasticity of non-diabetic old subjects. This new knowledge is of key

1 importance given current proposals to use metformin for improving health span of  
2 metabolic-healthy elderly humans.

3  
4 **Acknowledgements:** We thank Prof. KL Rudolph and Prof. Helen Morrison for critical  
5 discussions that were very helpful and important throughout the study and during  
6 manuscript preparation. We also thank the Proteomics Core Facility at FLI for  
7 supporting this study. The FLI is a member of the Leibniz Association and is financially  
8 supported by the Federal Government of Germany and the State of Thuringia. AM is  
9 supported by the German Research Council (Deutsche Forschungsgemeinschaft, DFG)  
10 via the Research Training Group Adaptive Stress Responses (GRK 1715), TP is  
11 supported by the German Academic Exchange Services (Deutsche Akademische  
12 Austauschdienst, DAAD).

13  
14 **Author contribution:** ME conceptualized and designed the study; LE, AD, PC, AM, TP,  
15 AN, YS performed experiments; ME, LE, AD, PC analyzed the data; ND and NR  
16 performed sample curation for proteomics analysis; JK and AO developed proteomics  
17 analysis protocols and analyzed proteomics data; AK designed the lipidomics study; LM  
18 and AK performed the lipidomics analysis; AK, OW and ME interpreted the lipidomics  
19 data; LE, PC and AO prepared figures; AD performed statistical analysis; ME wrote the  
20 manuscript and LE, AD, PC, JK, AK and AO reviewed the manuscript.

21  
22 **Data availability:** The mass spectrometry proteomics data that support the findings of  
23 this study have been deposited to the ProteomeXchange with the data set identifier  
24 PXD011579. All other relevant data is available from the corresponding author.

25  
26 **Declaration of interests:** Authors declare no competing interests.

## 27 **References:**

28  
29 (1978). Intestinal absorption of adenosine triphosphate. *Nutr Rev* 36, 309-311.

30  
31 Alfaras, I., Mitchell, S.J., Mora, H., Lugo, D.R., Warren, A., Navas-Enamorado, I., Hoffmann, V.,  
32 Hine, C., Mitchell, J.R., Le Couteur, D.G., *et al.* (2017). Health benefits of late-onset metformin  
33 treatment every other week in mice. *NPJ Aging Mech Dis* 3, 16.

34  
35 Andrzejewski, S., Gravel, S.P., Pollak, M., and St-Pierre, J. (2014). Metformin directly acts on  
36 mitochondria to alter cellular bioenergetics. *Cancer Metab* 2, 12.

37  
38 Anisimov, V.N., Berstein, L.M., Popovich, I.G., Zabezhinski, M.A., Egormin, P.A., Piskunova,  
39 T.S., Semenchenko, A.V., Tyndyk, M.L., Yurova, M.N., Kovalenko, I.G., *et al.* (2011). If started  
40 early in life, metformin treatment increases life span and postpones tumors in female SHR mice.  
41 *Aging* 3, 148-157.



1 Arts, I.C., Coolen, E.J., Bours, M.J., Huyghebaert, N., Stuart, M.A., Bast, A., and Dagnelie, P.C.  
2 (2012). Adenosine 5'-triphosphate (ATP) supplements are not orally bioavailable: a randomized,  
3 placebo-controlled cross-over trial in healthy humans. *J Int Soc Sports Nutr* 9, 16.

4  
5 Baldi, S., Bolognesi, A., Meinema, A.C., and Barral, Y. (2017). Heat stress promotes longevity in  
6 budding yeast by relaxing the confinement of age-promoting factors in the mother cell. *eLife* 6.

7  
8 Bannister, C.A., Holden, S.E., Jenkins-Jones, S., Morgan, C.L., Halcox, J.P., Scherthaner, G.,  
9 Mukherjee, J., and Currie, C.J. (2014). Can people with type 2 diabetes live longer than those  
10 without? A comparison of mortality in people initiated with metformin or sulphonylurea  
11 monotherapy and matched, non-diabetic controls. *Diabetes, obesity & metabolism* 16, 1165-  
12 1173.

13  
14 Benedetti, C., Haynes, C.M., Yang, Y., Harding, H.P., and Ron, D. (2006). Ubiquitin-like protein  
15 5 positively regulates chaperone gene expression in the mitochondrial unfolded protein  
16 response. *Genetics* 174, 229-239.

17  
18 Boudaba, N., Marion, A., Huet, C., Pierre, R., Viollet, B., and Foretz, M. (2018). AMPK Re-  
19 Activation Suppresses Hepatic Steatosis but its Downregulation Does Not Promote Fatty Liver  
20 Development. *EBioMedicine* 28, 194-209.

21  
22 Bratic, A., and Larsson, N.G. (2013). The role of mitochondria in aging. *J Clin Invest* 123, 951-  
23 957.

24  
25 Bratic, I., and Trifunovic, A. (2010). Mitochondrial energy metabolism and ageing. *Biochim*  
26 *Biophys Acta* 1797, 961-967.

27  
28 Brys, K., Castelein, N., Matthijssens, F., Vanfleteren, J.R., and Braeckman, B.P. (2010).  
29 Disruption of insulin signalling preserves bioenergetic competence of mitochondria in ageing  
30 *Caenorhabditis elegans*. *BMC biology* 8, 91.

31  
32 Cabreiro, F., Au, C., Leung, K.Y., Vergara-Irigaray, N., Cocheme, H.M., Noori, T., Weinkove, D.,  
33 Schuster, E., Greene, N.D., and Gems, D. (2013). Metformin retards aging in *C. elegans* by  
34 altering microbial folate and methionine metabolism. *Cell* 153, 228-239.

35  
36 Cameron, A.R., Logie, L., Patel, K., Erhardt, S., Bacon, S., Middleton, P., Harthill, J., Forteach,  
37 C., Coats, J.T., Kerr, C., *et al.* (2018). Metformin selectively targets redox control of complex I  
38 energy transduction. *Redox Biol* 14, 187-197.

39  
40 Cellerino, A., and Ori, A. (2017). What have we learned on aging from omics studies? *Semin*  
41 *Cell Dev Biol* 70, 177-189.

42  
43 Chinopoulos, C., and Adam-Vizi, V. (2010). Mitochondria as ATP consumers in cellular  
44 pathology. *Biochim Biophys Acta* 1802, 221-227.

45  
46 Collier, C.A., Bruce, C.R., Smith, A.C., Lopaschuk, G., and Dyck, D.J. (2006). Metformin  
47 counters the insulin-induced suppression of fatty acid oxidation and stimulation of triacylglycerol  
48 storage in rodent skeletal muscle. *Am J Physiol Endocrinol Metab* 291, E182-189.

49

1 Cree, M.G., Newcomer, B.R., Katsanos, C.S., Sheffield-Moore, M., Chinkes, D., Aarsland, A.,  
2 Urban, R., and Wolfe, R.R. (2004). Intramuscular and liver triglycerides are increased in the  
3 elderly. *J Clin Endocrinol Metab* 89, 3864-3871.

4  
5 De Haes, W., Frooninckx, L., Van Assche, R., Smolders, A., Depuydt, G., Billen, J., Braeckman,  
6 B.P., Schoofs, L., and Temmerman, L. (2014). Metformin promotes lifespan through  
7 mitohormesis via the peroxiredoxin PRDX-2. *Proceedings of the National Academy of Sciences*  
8 *of the United States of America* 111, E2501-2509.

9  
10 Dorman, J.B., Albinder, B., Shroyer, T., and Kenyon, C. (1995). The age-1 and daf-2 genes  
11 function in a common pathway to control the lifespan of *Caenorhabditis elegans*. *Genetics* 141,  
12 1399-1406.

13  
14 Drew, B., Phaneuf, S., Dirks, A., Selman, C., Gredilla, R., Lezza, A., Barja, G., and  
15 Leeuwenburgh, C. (2003). Effects of aging and caloric restriction on mitochondrial energy  
16 production in gastrocnemius muscle and heart. *Am J Physiol Regul Integr Comp Physiol* 284,  
17 R474-480.

18  
19 Feng, J., Bussiere, F., and Hekimi, S. (2001). Mitochondrial electron transport is a key  
20 determinant of life span in *Caenorhabditis elegans*. *Dev Cell* 1, 633-644.

21  
22 Fullerton, M.D., Galic, S., Marcinko, K., Sikkema, S., Pulinilkunnil, T., Chen, Z.P., O'Neill, H.M.,  
23 Ford, R.J., Palanivel, R., O'Brien, M., *et al.* (2013). Single phosphorylation sites in Acc1 and  
24 Acc2 regulate lipid homeostasis and the insulin-sensitizing effects of metformin. *Nat Med* 19,  
25 1649-1654.

26  
27 Gao, A.W., Chatzisprou, I.A., Kamble, R., Liu, Y.J., Herzog, K., Smith, R.L., van Lenthe, H.,  
28 Vervaart, M.A.T., van Cruchten, A., Luyf, A.C., *et al.* (2017). A sensitive mass spectrometry  
29 platform identifies metabolic changes of life history traits in *C. elegans*. *Sci Rep* 7, 2408.

30  
31 Gosai, S.J., Kwak, J.H., Luke, C.J., Long, O.S., King, D.E., Kovatch, K.J., Johnston, P.A., Shun,  
32 T.Y., Lazo, J.S., Perlmutter, D.H., *et al.* (2010). Automated high-content live animal drug  
33 screening using *C. elegans* expressing the aggregation prone serpin alpha1-antitrypsin Z. *PLoS*  
34 *one* 5, e15460.

35  
36 Haigis, M.C., and Yankner, B.A. (2010). The aging stress response. *Mol Cell* 40, 333-344.  
37 Hansen, M., Rubinsztein, D.C., and Walker, D.W. (2018). Autophagy as a promoter of longevity:  
38 insights from model organisms. *Nat Rev Mol Cell Biol* 19, 579-593.

39  
40 Honda, Y., and Honda, S. (1999). The daf-2 gene network for longevity regulates oxidative  
41 stress resistance and Mn-superoxide dismutase gene expression in *Caenorhabditis elegans*.  
42 *FASEB J* 13, 1385-1393.

43  
44 Kenyon, C. (2011). The first long-lived mutants: discovery of the insulin/IGF-1 pathway for  
45 ageing. *Philos Trans R Soc Lond B Biol Sci* 366, 9-16.

46  
47 Kim, S.J., Tang, T., Abbott, M., Viscarra, J.A., Wang, Y., and Sul, H.S. (2016). AMPK  
48 Phosphorylates Desnutrin/ATGL and Hormone-Sensitive Lipase To Regulate Lipolysis and  
49 Fatty Acid Oxidation within Adipose Tissue. *Mol Cell Biol* 36, 1961-1976.

50

1 Kimura, K.D., Tissenbaum, H.A., Liu, Y., and Ruvkun, G. (1997). *daf-2*, an insulin receptor-like  
2 gene that regulates longevity and diapause in *Caenorhabditis elegans*. *Science* 277, 942-946.

3  
4 Konopka, A.R., Laurin, J.L., Schoenberg, H.M., Reid, J.J., Castor, W.M., Wolff, C.A., Musci,  
5 R.V., Safairad, O.D., Linden, M.A., Biela, L.M., *et al.* (2019). Metformin inhibits mitochondrial  
6 adaptations to aerobic exercise training in older adults. *Aging Cell* 18, e12880.

7 Kulkarni, A.S., Brutsaert, E.F., Anghel, V., Zhang, K., Bloomgarden, N., Pollak, M., Mar, J.C.,  
8 Hawkins, M., Crandall, J.P., and Barzilai, N. (2018). Metformin regulates metabolic and  
9 nonmetabolic pathways in skeletal muscle and subcutaneous adipose tissues of older adults.  
10 *Aging Cell* 17.

11  
12 Lapierre, L.R., Gelino, S., Melendez, A., and Hansen, M. (2011). Autophagy and lipid  
13 metabolism coordinately modulate life span in germline-less *C. elegans*. *Curr Biol* 21, 1507-  
14 1514.

15  
16 Lee, J.H., Kong, J., Jang, J.Y., Han, J.S., Ji, Y., Lee, J., and Kim, J.B. (2014). Lipid droplet  
17 protein LID-1 mediates ATGL-1-dependent lipolysis during fasting in *Caenorhabditis elegans*.  
18 *Mol Cell Biol* 34, 4165-4176.

19  
20 MacInnes, A.W. (2016). The role of the ribosome in the regulation of longevity and lifespan  
21 extension. *Wiley interdisciplinary reviews RNA* 7, 198-212.

22  
23 Markel, A., Brook, J.G., and Aviram, M. (1985). Increased plasma triglycerides, cholesterol and  
24 apolipoprotein E during prolonged fasting in normal subjects. *Postgrad Med J* 61, 395-400.

25  
26 Martin-Montalvo, A., Mercken, E.M., Mitchell, S.J., Palacios, H.H., Mote, P.L., Scheibye-  
27 Knudsen, M., Gomes, A.P., Ward, T.M., Minor, R.K., Blouin, M.J., *et al.* (2013). Metformin  
28 improves healthspan and lifespan in mice. *Nature communications* 4, 2192.

29  
30 Narbonne, P., and Roy, R. (2009). *Caenorhabditis elegans* dauers need LKB1/AMPK to ration  
31 lipid reserves and ensure long-term survival. *Nature* 457, 210-214.

32  
33 Nargund, A.M., Pellegrino, M.W., Fiorese, C.J., Baker, B.M., and Haynes, C.M. (2012).  
34 Mitochondrial import efficiency of ATFS-1 regulates mitochondrial UPR activation. *Science* 337,  
35 587-590.

36  
37 Nguyen, T.B., Louie, S.M., Daniele, J.R., Tran, Q., Dillin, A., Zoncu, R., Nomura, D.K., and  
38 Olzmann, J.A. (2017). DGAT1-Dependent Lipid Droplet Biogenesis Protects Mitochondrial  
39 Function during Starvation-Induced Autophagy. *Dev Cell* 42, 9-21 e25.

40  
41 Onken, B., and Driscoll, M. (2010). Metformin induces a dietary restriction-like state and the  
42 oxidative stress response to extend *C. elegans* Healthspan via AMPK, LKB1, and SKN-1. *PLoS*  
43 *one* 5, e8758.

44  
45 Palikaras, K., Lionaki, E., and Tavernarakis, N. (2015). Coordination of mitophagy and  
46 mitochondrial biogenesis during ageing in *C. elegans*. *Nature* 521, 525-528.

47  
48 Pryor, R., Norvaisas, P., Marinos, G., Best, L., Thingholm, L.B., Quintaneiro, L.M., De Haes, W.,  
49 Esser, D., Waschina, S., Lujan, C., *et al.* (2019). Host-Microbe-Drug-Nutrient Screen Identifies  
50 Bacterial Effectors of Metformin Therapy. *Cell* 178, 1299-1312 e1229.

51

1 Revtovich, A.V., Lee, R., and Kirienko, N.V. (2019). Interplay between mitochondria and diet  
2 mediates pathogen and stress resistance in *Caenorhabditis elegans*. *PLoS Genet* 15,  
3 e1008011.

4  
5 Salani, B., Del Rio, A., Marini, C., Sambuceti, G., Cordera, R., and Maggi, D. (2014). Metformin,  
6 cancer and glucose metabolism. *Endocrine-related cancer* 21, R461-471.

7 Steinhäuser, M.L., Olenchock, B.A., O'Keefe, J., Lun, M., Pierce, K.A., Lee, H., Pantano, L.,  
8 Klibanski, A., Shulman, G.I., Clish, C.B., *et al.* (2018). The circulating metabolome of human  
9 starvation. *JCI Insight* 3.

10  
11 Strong, R., Miller, R.A., Antebi, A., Astle, C.M., Bogue, M., Denzel, M.S., Fernandez, E.,  
12 Flurkey, K., Hamilton, K.L., Lamming, D.W., *et al.* (2016). Longer lifespan in male mice treated  
13 with a weakly estrogenic agonist, an antioxidant, an alpha-glucosidase inhibitor or a Nrf2-  
14 inducer. *Aging Cell* 15, 872-884.

15  
16 Sun, N., Youle, R.J., and Finkel, T. (2016). The Mitochondrial Basis of Aging. *Mol Cell* 61, 654-  
17 666.

18  
19 Taylor, R.C., and Dillin, A. (2011). Aging as an event of proteostasis collapse. *Cold Spring*  
20 *Harbor perspectives in biology* 3.

21  
22 Thangthaeng, N., Rutledge, M., Wong, J.M., Vann, P.H., Forster, M.J., and Sumien, N. (2017).  
23 Metformin Impairs Spatial Memory and Visual Acuity in Old Male Mice. *Aging Dis* 8, 17-30.

24  
25 Thomsson, E., Svensson, M., and Larsson, C. (2005). Rapamycin pre-treatment preserves  
26 viability, ATP level and catabolic capacity during carbon starvation of *Saccharomyces*  
27 *cerevisiae*. *Yeast* 22, 615-623.

28  
29 Tigges, J., Krutmann, J., Fritsche, E., Haendeler, J., Schaal, H., Fischer, J.W., Kalfalah, F.,  
30 Reinke, H., Reifenberger, G., Stuhler, K., *et al.* (2014). The hallmarks of fibroblast ageing. *Mech*  
31 *Ageing Dev* 138, 26-44.

32  
33 Tissenbaum, H.A., and Ruvkun, G. (1998). An insulin-like signaling pathway affects both  
34 longevity and reproduction in *Caenorhabditis elegans*. *Genetics* 148, 703-717.

35  
36 Trifunovic, A., Wredenberg, A., Falkenberg, M., Spelbrink, J.N., Rovio, A.T., Bruder, C.E.,  
37 Bohlooly, Y.M., Gidlof, S., Oldfors, A., Wibom, R., *et al.* (2004). Premature ageing in mice  
38 expressing defective mitochondrial DNA polymerase. *Nature* 429, 417-423.

39  
40 Vankoningsloo, S., De Pauw, A., Houbion, A., Tejerina, S., Demazy, C., de Longueville, F.,  
41 Bertholet, V., Renard, P., Remacle, J., Holvoet, P., *et al.* (2006). CREB activation induced by  
42 mitochondrial dysfunction triggers triglyceride accumulation in 3T3-L1 preadipocytes. *J Cell Sci*  
43 119, 1266-1282.

44  
45 Vrablik, T.L., Petyuk, V.A., Larson, E.M., Smith, R.D., and Watts, J.L. (2015). Lipidomic and  
46 proteomic analysis of *Caenorhabditis elegans* lipid droplets and identification of ACS-4 as a lipid  
47 droplet-associated protein. *Biochim Biophys Acta* 1851, 1337-1345.

48  
49 Weir, H.J., Yao, P., Huynh, F.K., Escoubas, C.C., Goncalves, R.L., Burkewitz, K., Laboy, R.,  
50 Hirschey, M.D., and Mair, W.B. (2017). Dietary Restriction and AMPK Increase Lifespan via  
51 Mitochondrial Network and Peroxisome Remodeling. *Cell metabolism* 26, 884-896 e885.

1  
2 Wheaton, W.W., Weinberg, S.E., Hamanaka, R.B., Soberanes, S., Sullivan, L.B., Anso, E.,  
3 Glasauer, A., Dufour, E., Mutlu, G.M., Budigner, G.S., *et al.* (2014). Metformin inhibits  
4 mitochondrial complex I of cancer cells to reduce tumorigenesis. *eLife* 3, e02242.  
5 Wilhelm, T., Byrne, J., Medina, R., Kolundzic, E., Geisinger, J., Hajduskova, M., Tursun, B., and  
6 Richly, H. (2017). Neuronal inhibition of the autophagy nucleation complex extends life span in  
7 post-reproductive *C. elegans*. *Genes & development* 31, 1561-1572.  
8  
9 Wu, L., Zhou, B., Oshiro-Rapley, N., Li, M., Paulo, J.A., Webster, C.M., Mou, F., Kacergis, M.C.,  
10 Talkowski, M.E., Carr, C.E., *et al.* (2016). An Ancient, Unified Mechanism for Metformin Growth  
11 Inhibition in *C. elegans* and Cancer. *Cell* 167, 1705-1718 e1713.  
12  
13 Xia, J., Gravato-Nobre, M., and Ligoxygakis, P. (2019). Convergence of longevity and immunity:  
14 lessons from animal models. *Biogerontology*.  
15  
16 Zang, M., Zuccollo, A., Hou, X., Nagata, D., Walsh, K., Herscovitz, H., Brecher, P., Ruderman,  
17 N.B., and Cohen, R.A. (2004). AMP-activated protein kinase is required for the lipid-lowering  
18 effect of metformin in insulin-resistant human HepG2 cells. *The Journal of biological chemistry*  
19 279, 47898-47905.  
20  
21 Zhang, J., Bakheet, R., Parhar, R.S., Huang, C.H., Hussain, M.M., Pan, X., Siddiqui, S.S., and  
22 Hashmi, S. (2011). Regulation of fat storage and reproduction by Kruppel-like transcription  
23 factor KLF3 and fat-associated genes in *Caenorhabditis elegans*. *J Mol Biol* 411, 537-553.  
24  
25 Zhang, P., Na, H., Liu, Z., Zhang, S., Xue, P., Chen, Y., Pu, J., Peng, G., Huang, X., Yang, F.,  
26 *et al.* (2012). Proteomic study and marker protein identification of *Caenorhabditis elegans* lipid  
27 droplets. *Mol Cell Proteomics* 11, 317-328.  
28  
29 Zheng, X., Boyer, L., Jin, M., Kim, Y., Fan, W., Bardy, C., Berggren, T., Evans, R.M., Gage,  
30 F.H., and Hunter, T. (2016). Alleviation of neuronal energy deficiency by mTOR inhibition as a  
31 treatment for mitochondria-related neurodegeneration. *eLife* 5.  
32  
33 Zhou, B., Kreuzer, J., Kumsta, C., Wu, L., Kamer, K.J., Cedillo, L., Zhang, Y., Li, S., Kacergis,  
34 M.C., Webster, C.M., *et al.* (2019). Mitochondrial Permeability Uncouples Elevated Autophagy  
35 and Lifespan Extension. *Cell* 177, 299-314 e216.

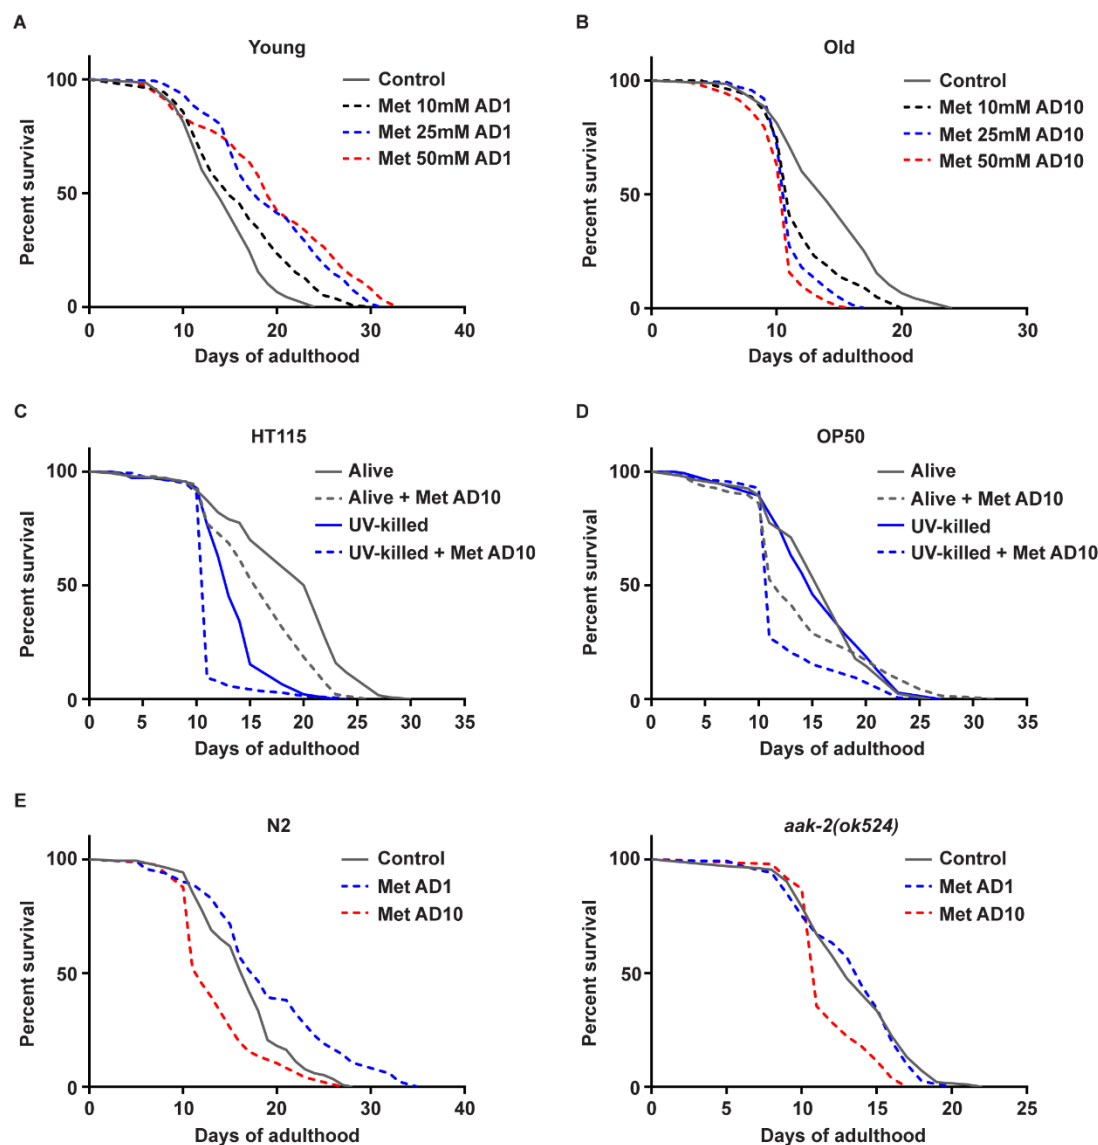

1  
2  
3 **Figure 1. Metformin treatment initiated in late life exerts toxicity and limits**  
4 **survival independently of AMPK and microbial changes.** Wild type (WT, N2 Bristol  
5 strain) nematodes were treated with indicated doses of metformin (Met) on day 1 (A)  
6 and day 10 (B) of adulthood (AD1 and AD10 respectively), survival was scored daily.  
7 WT nematodes were grown on alive and UV-killed HT115 (C) and OP50 (D) *E. coli* and  
8 treated with 50mM metformin on AD10. Survival was scored daily. WT (E, left) and  
9 AMPK deficient (E, right) nematodes were treated with 50mM metformin on AD1 and  
10 AD10, survival was scored daily. Significance was measured by log-rank test,  $n \geq 100$  in  
11 all cases, the exact  $n$  numbers and statistical values for all panels are presented in  
12 Table S1. Each experiment was repeated  $\geq 3$  times; one representative result is shown  
13 in all cases.  
14

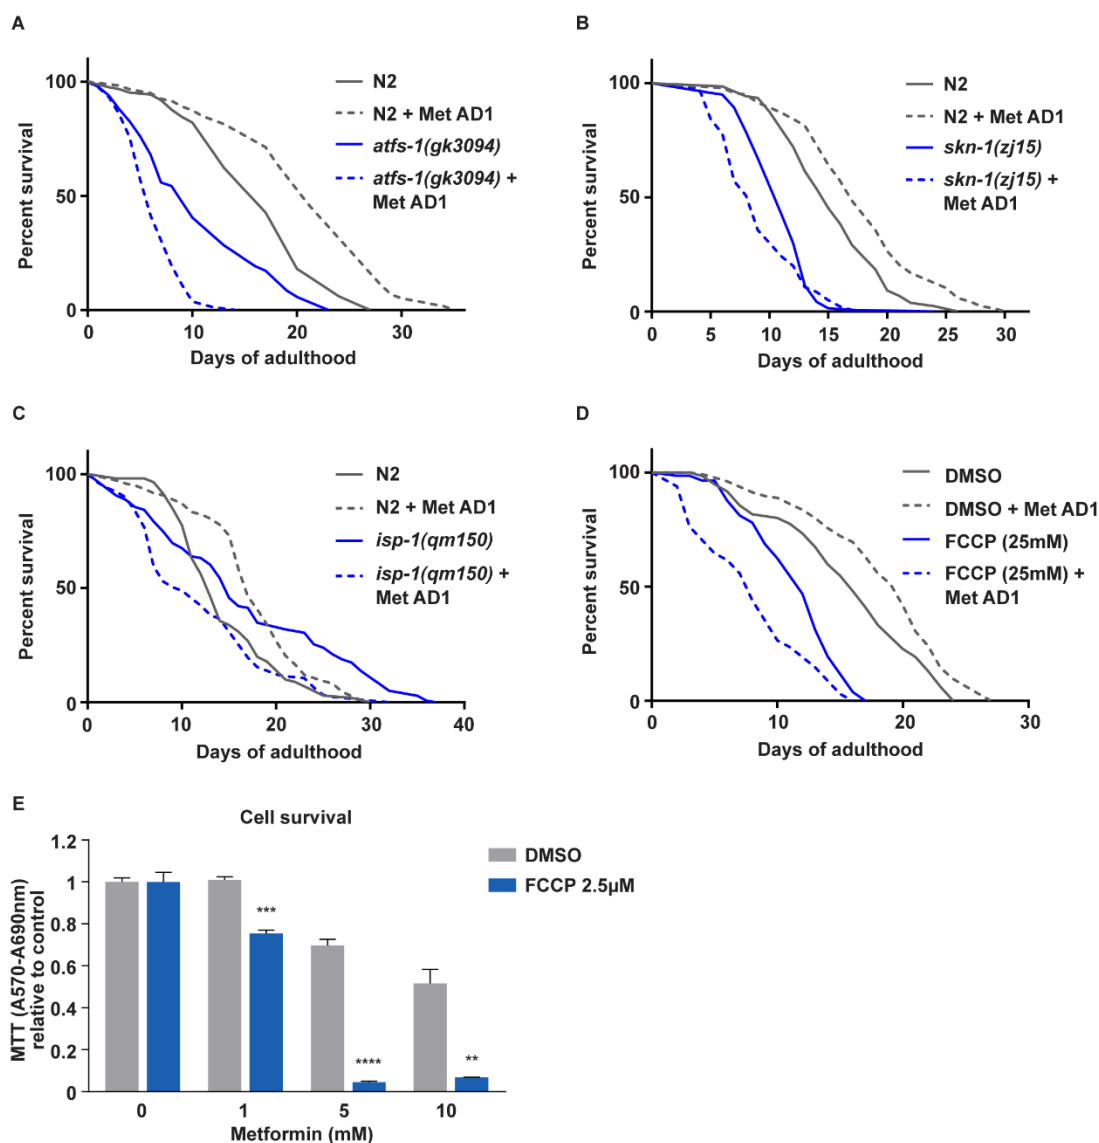

**Figure 2. Mitochondrial impairments pre-dispose nematodes and human cells to metformin toxicity.** *atfs-1(gk3094)* (A), *skn-1(zj15)* (B) and *isp-1(qm150)* (C)

nematodes were exposed to 50mM metformin on adulthood day 1 (AD1) along with age-matched WT animals, survival was scored daily. AD1 WT nematodes (D) and early passage (population doubling, PD37) human primary fibroblasts (E) were co-treated with FCCP and metformin (50mM in worms), survival was measured daily in worms and after 24h of metformin treatment in cells; DMSO was used as a vehicle control for FCCP in both cells and worms; in E all values are relative to a respective untreated (no metformin) condition (separately for vehicle and FCCP). For A-D, significance was measured by log-rank test; all n numbers (n≥100 in all cases) and statistical values are presented in Table S1. For E n=3, mean and SEM are presented, two-tailed unpaired t-

1 test was used for the statistical analysis, all statistical values are shown in Table S2; \*\*  
2 p<0,01; \*\*\* p<0,001; \*\*\*\* p<0,0001.  
3



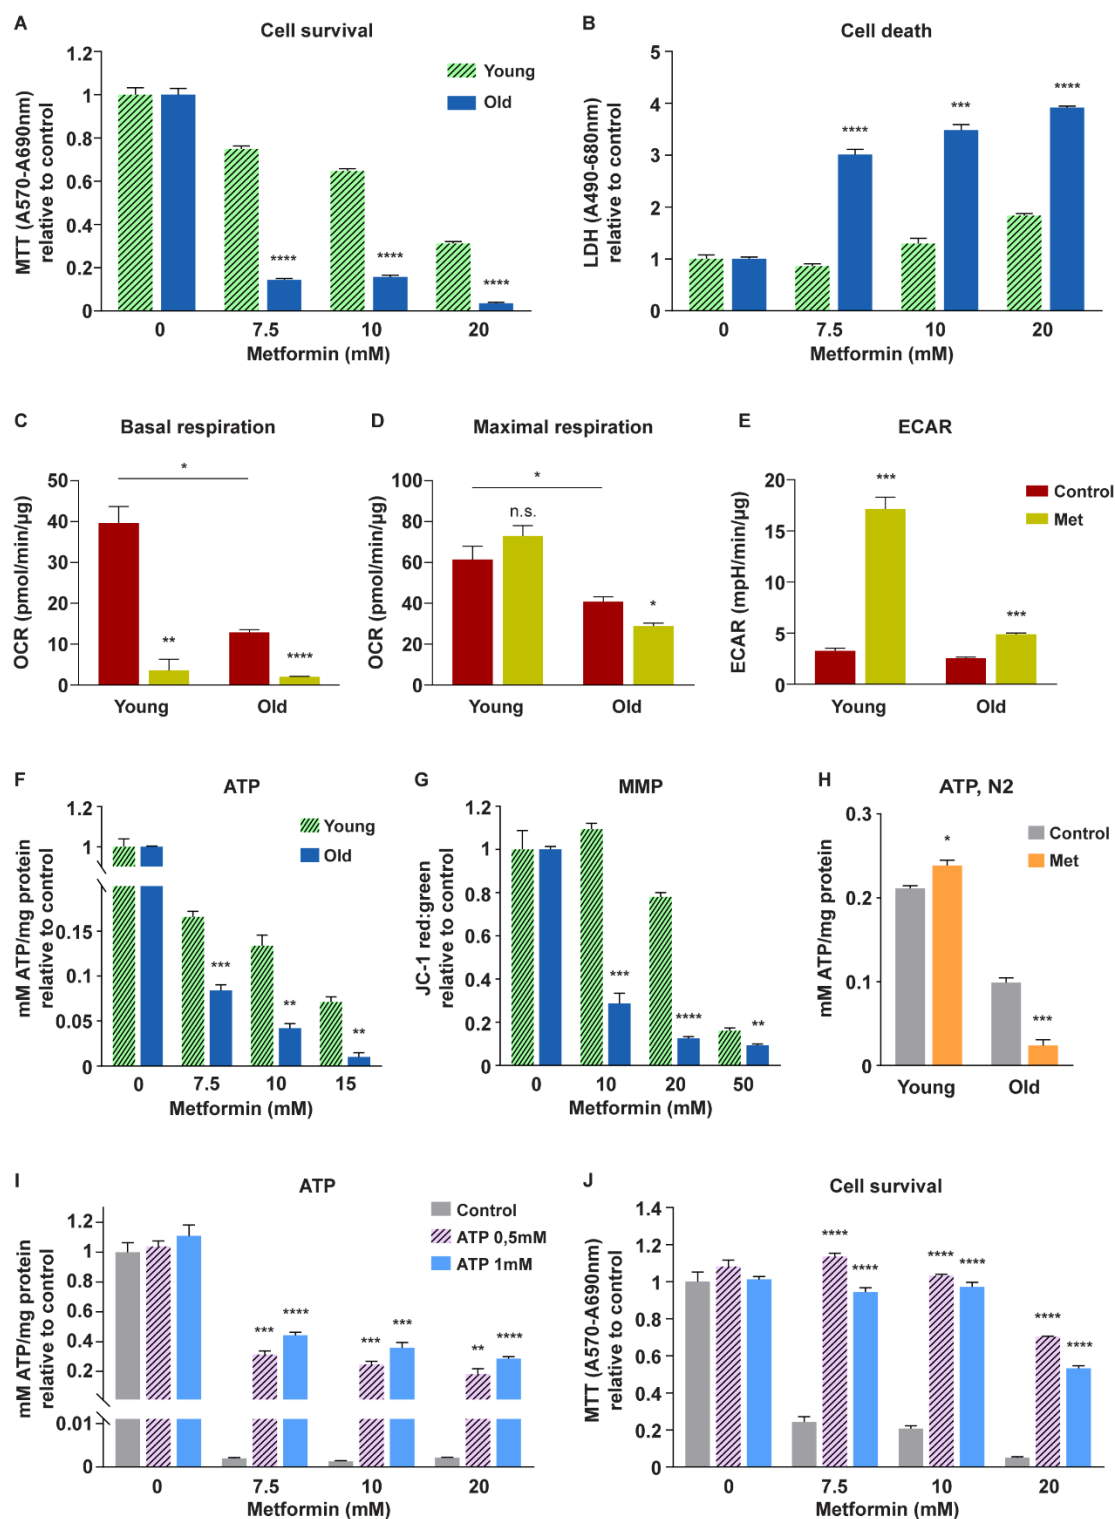

1  
2  
3  
4  
5  
6

**Figure 3. Metformin toxicity associates with loss of mitochondrial homeostasis and ATP exhaustion in human cells and nematodes.** Young (PD36) and old (PD61) human skin fibroblasts were treated with metformin for 15 (F, G) or 20 (A, B) hours; cell survival (A, MTT assay), cell death (B, LDH assay), mitochondrial membrane potential

1 (G, JC-1 assay) and ATP content (F) were measured; all values are relative to the  
2 untreated control of a given age. (C–E) Young (PD29) and old (PD61) primary human  
3 skin fibroblasts were treated with metformin for 16h, then washed and pre-incubated  
4 with media containing high glucose (10mM), glutamine (2mM) and pyruvate (1mM);  
5 continuous oxygen consumption rates (OCR) and extracellular acidification rates  
6 (ECAR) were recorded following injection of oligomycin (1 $\mu$ M), FCCP (3 $\mu$ M), antimycin-  
7 A (0,5 $\mu$ M) and rotenone (0,5 $\mu$ M) (shown in Fig S4). The recorded values were  
8 normalized to protein content, basal respiration (C), maximal respiration (D) and basal  
9 ECAR (E) were quantified. (H) Young (adulthood day 1) and old (adulthood day 10) wild  
10 type nematodes were treated with 50mM metformin, whole organism ATP levels were  
11 measured after 36h. Pre-senescent (PD44) fibroblasts were treated with metformin for  
12 24h in presence or absence of ATP; ATP content (I) and cell survival (J) were  
13 measured; all values are relative to the untreated control (no metformin, no ATP) for  
14 each assay. For H n=100, for all other panels n=3, mean and SEM are presented, two-  
15 tailed unpaired t-test was used for the statistical analysis, all statistical values are  
16 presented in Table S2; \* p<0,05; \*\* p<0,01; \*\*\* p<0,001; \*\*\*\* p<0,0001.

17

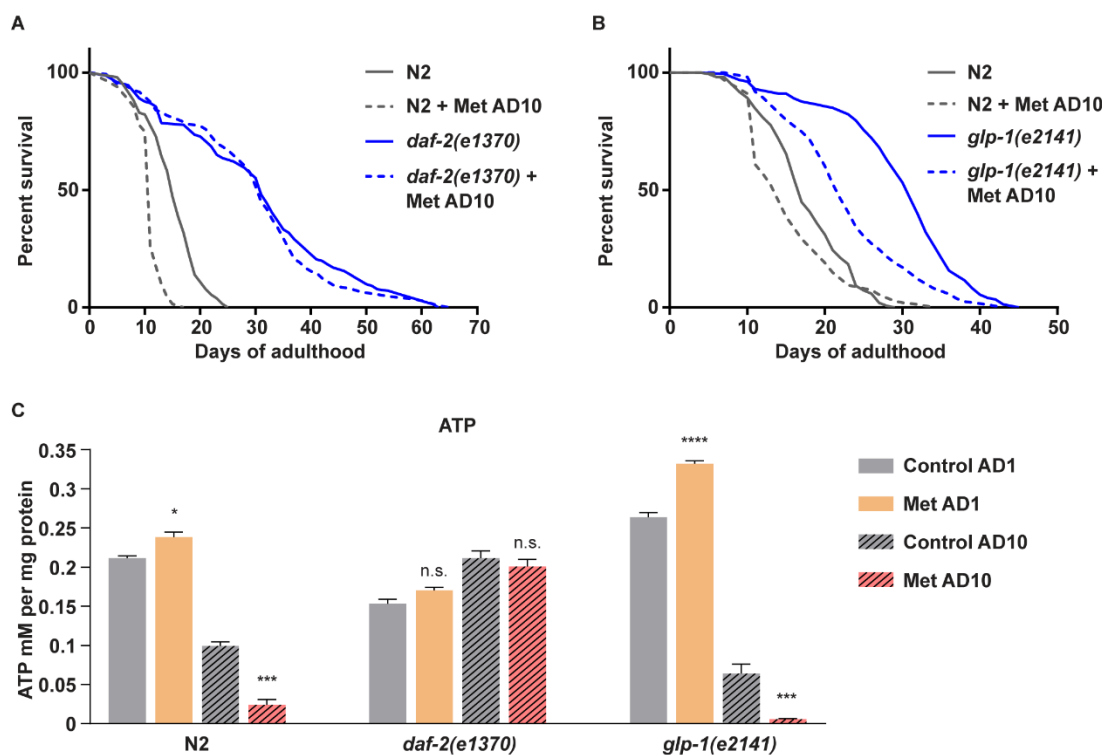

**Figure 4. Insulin receptor deficiency suspends late life metformin toxicity in *C. elegans* by preventing metformin-triggered ATP exhaustion.** *daf-2(e1370)* (A) and *glp-1(e2141)* (B) temperature sensitive mutants and corresponding wild type (N2 Bristol strain) control animals were grown at 20°C and 25°C respectively to achieve inactivation of *daf-2* and *glp-1* pathways. All animals were treated with 50mM metformin (Met) on adulthood day 10 (AD10), survival was scored daily. (C) Whole organism ATP levels were measured in wild type, *daf-2(e1370)* and *glp-1(e2141)* mutant animals treated with 50mM metformin on AD1 and AD10, the measurement was performed after 36h of metformin exposure. For A-B significance was measured by log-rank test; n numbers (n≥100 in all cases) and statistical values are presented in Table S1. For C n=100 for each condition, mean and SEM are presented, two-tailed unpaired t-test was used for the statistical analysis, all statistical values are presented in Table S2; \* p<0,05; \*\*\* p<0,001; \*\*\*\* p<0,0001.

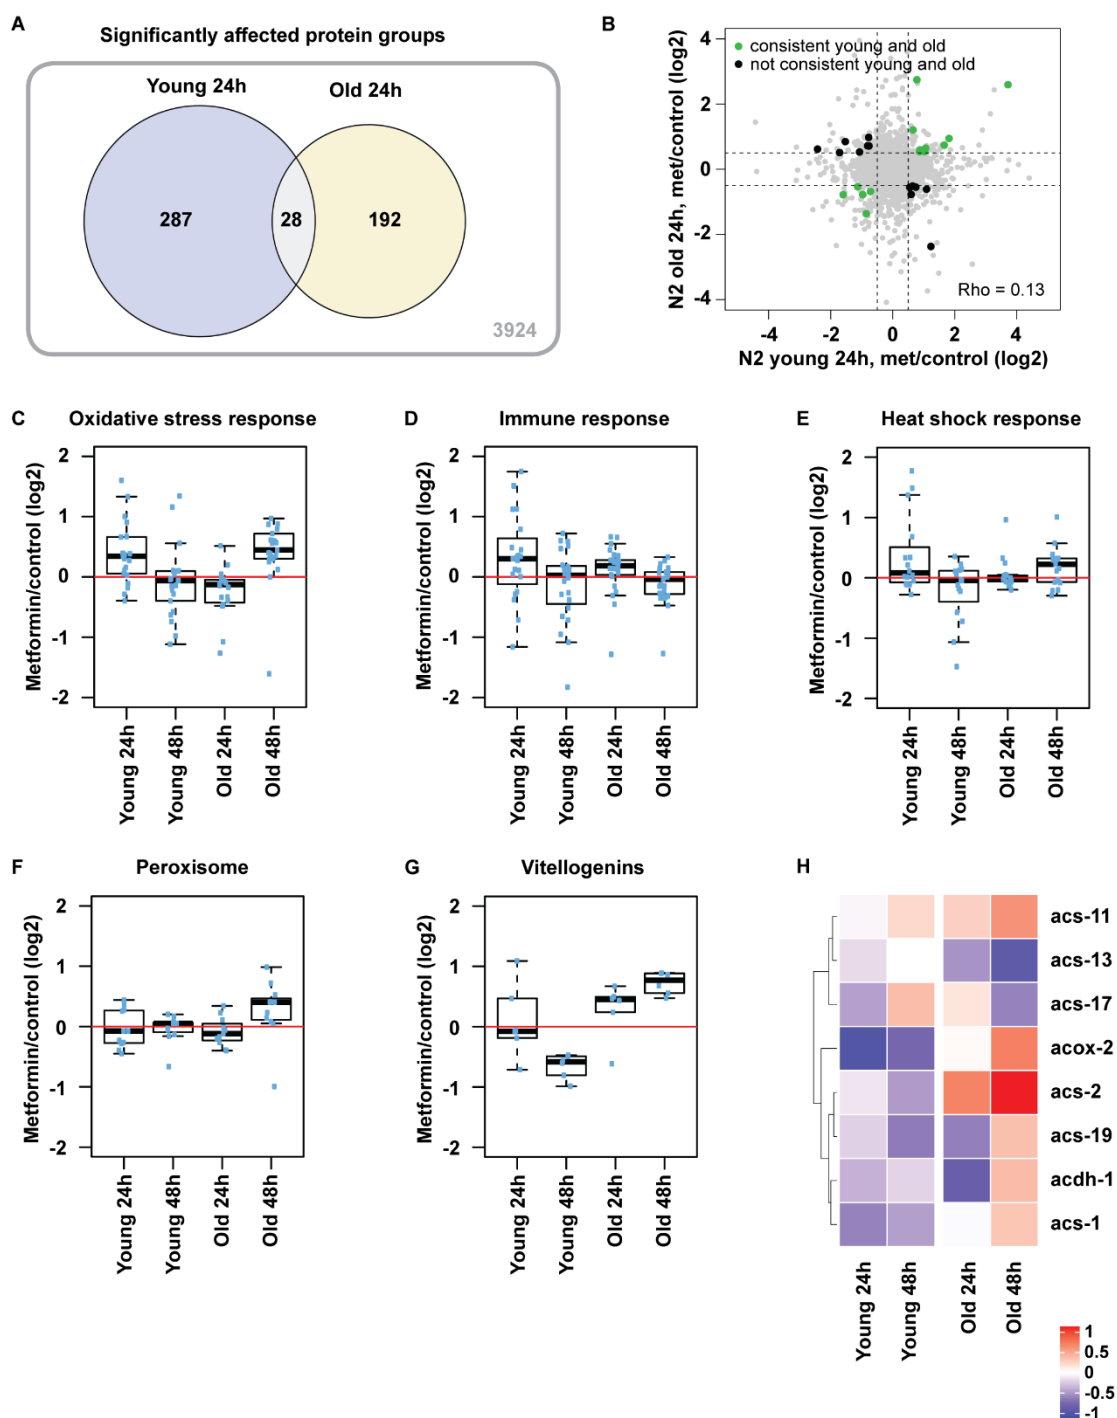

1  
2  
3  
4  
5  
6  
7  
8

**Figure 5. The induction of longevity assurance pathways and metabolic adaptations by metformin is age-dependent.** Wild type worms were treated with 50mM metformin on adulthood day 1 (young) and 10 (old). **(A)** Venn diagram showing overlap between significantly altered proteins after 24h of early and late life metformin treatment is shown; the circled values include all proteins with absolute log<sub>2</sub> fold change above 0.5 and Q value below 0.25; the number in the outside box indicates non-

1 regulated proteins detected in both young and old samples collected at 24h; fold  
2 changes were calculated against age- and time point matched untreated controls. Three  
3 independent pools of worms were analyzed for each sample group. **(B)** Scatter plot  
4 comparing log<sub>2</sub> fold changes of individual proteins (shown as dots) after 24h of  
5 metformin treatment at young and old age is shown. Proteins significantly regulated at  
6 both ages are highlighted with color: the green-highlighted proteins are consistently  
7 regulated at both ages while black-highlighted ones are regulated in the opposite  
8 direction between young and old age. The correlation coefficient (Rho) between young  
9 and old responses taking into account all regulated proteins is shown. Boxplots showing  
10 fold changes for selected proteins involved in oxidative stress response **(C)**, immune  
11 response **(D)**, heat stress response **(E)** as well as peroxisomal proteins **(F)** and  
12 vitellogenins **(G)** are presented. The median fold change of the proteins belonging to  
13 each group is shown as a bold line, the upper and lower limits of the boxplot indicate the  
14 first and third quartile, respectively, and whiskers extend 1.5 times the interquartile  
15 range from the limits of the box. **(H)** Heatmaps of selected proteins implicated in lipid  
16 metabolism are shown, only fold changes with significance in at least one age/treatment  
17 combination are depicted. n≥500 and 3 replicas were measured for each condition. The  
18 list and complete data of proteins used for each boxplot and the heatmap are reported  
19 in Table S3.

20

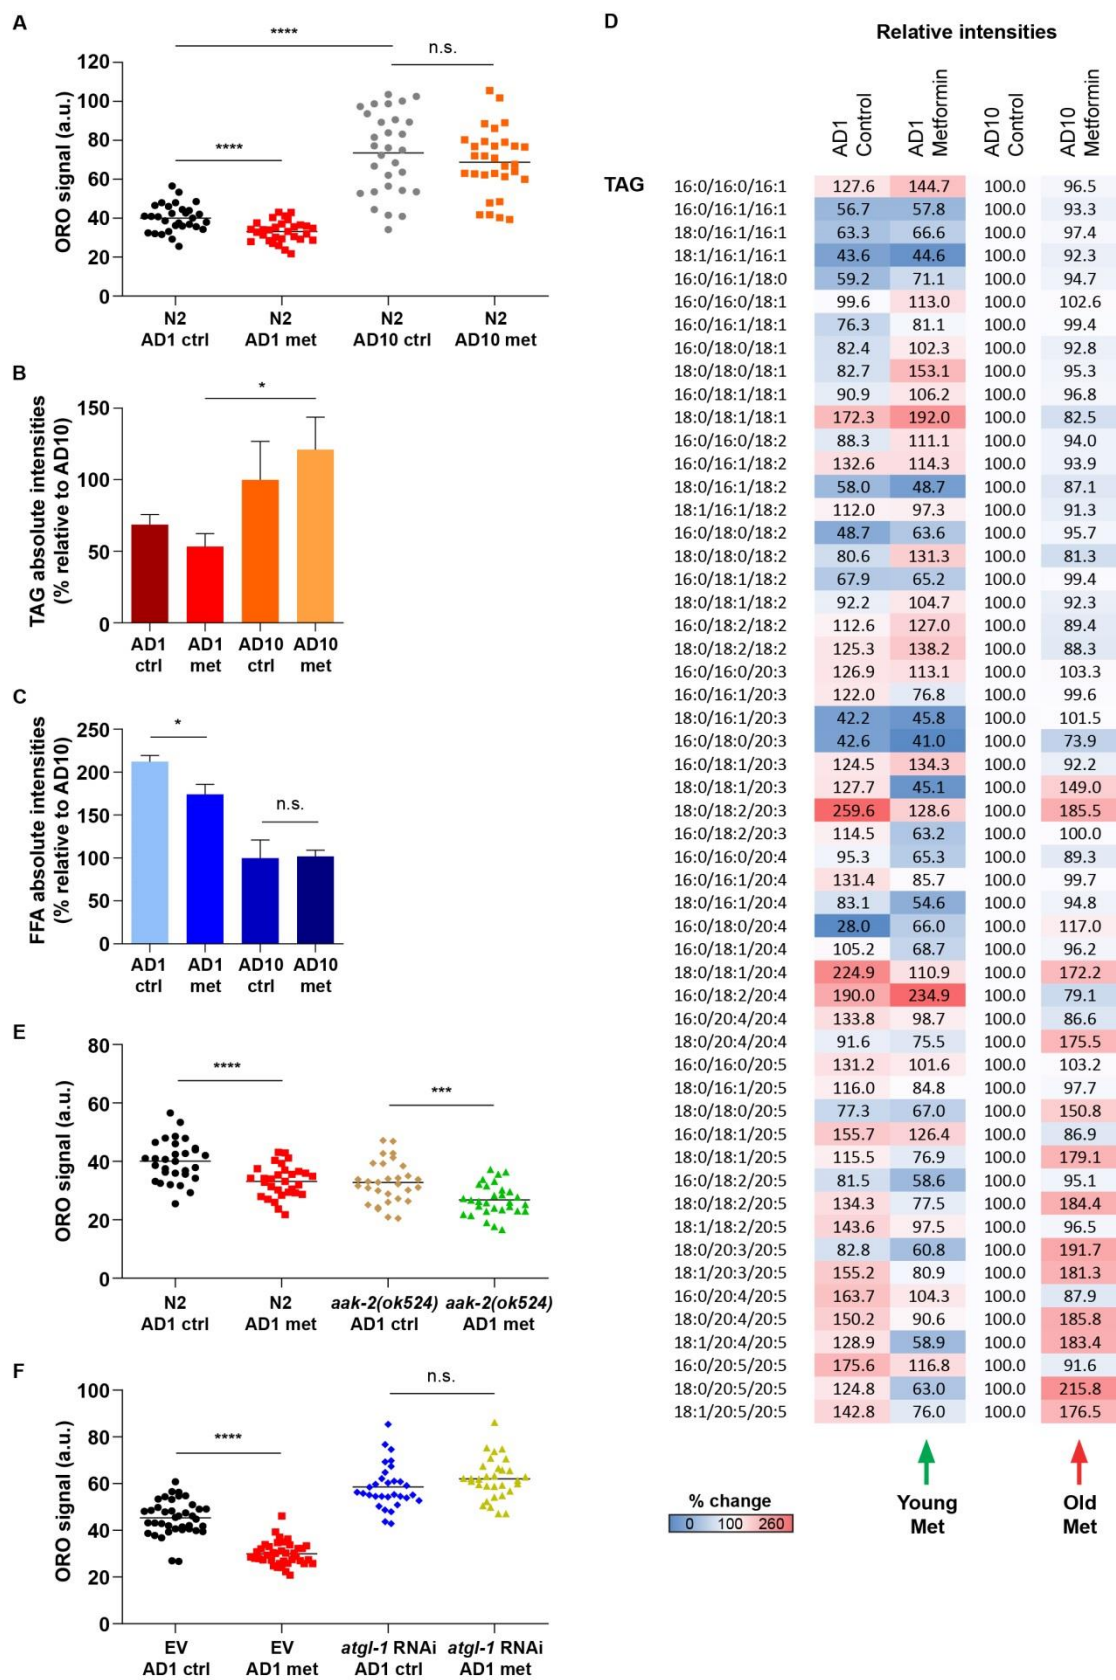

1

2

1 **Figure 6. Metformin induces a dietary restriction mimetic lipid turnover response**  
2 **via the protein kinase A pathway in young but not old animals. (A)** Whole body lipid  
3 content was detected by Oil Red O staining in young (adulthood day 1, AD1) and old  
4 (adulthood day 10, AD10) worms treated with 50mM metformin for 24h. Wild type (N2  
5 Bristol strain), AMPK deficient (**E**) and *atgl-1* RNAi knock down animals (**F**) were treated  
6 with 50mM metformin on adulthood day 1 (AD1) and whole body Oil Red O lipid staining  
7 was performed after 24h of treatment; Oil Red O mean grey values (ImageJ) are used  
8 as arbitrary units (a.u.) in all cases. Wild type animals were treated with 50mM  
9 metformin for 24h on AD1 and AD10; lipids were isolated and analyzed by UPLC-  
10 MS/MS, absolute intensities for triglycerides (TAGs) (**B**) and free fatty acids (FAAs) (**C**),  
11 and relative intensities for distinct TAGs (**D**) are shown, normalized to the AD10  
12 untreated control in all cases (chosen to highlight the late life specific effects of  
13 metformin). Definitions of absolute and relative intensities are provided in the Methods  
14 section. For **A** and **E** n=30, for **F** n≥31 and for **B-D** 700 animals were analyzed in 3  
15 replicas for each condition; mean and SEM (for **B**, **C**) are presented, two-tailed unpaired  
16 t-test was used for the statistical analysis when applicable, all statistical values are  
17 presented in Table S2; \* p<0,05; \*\*\* p<0,001; \*\*\*\* p<0,0001. All individual values for the  
18 lipidomics analysis are summarized in Table S4.

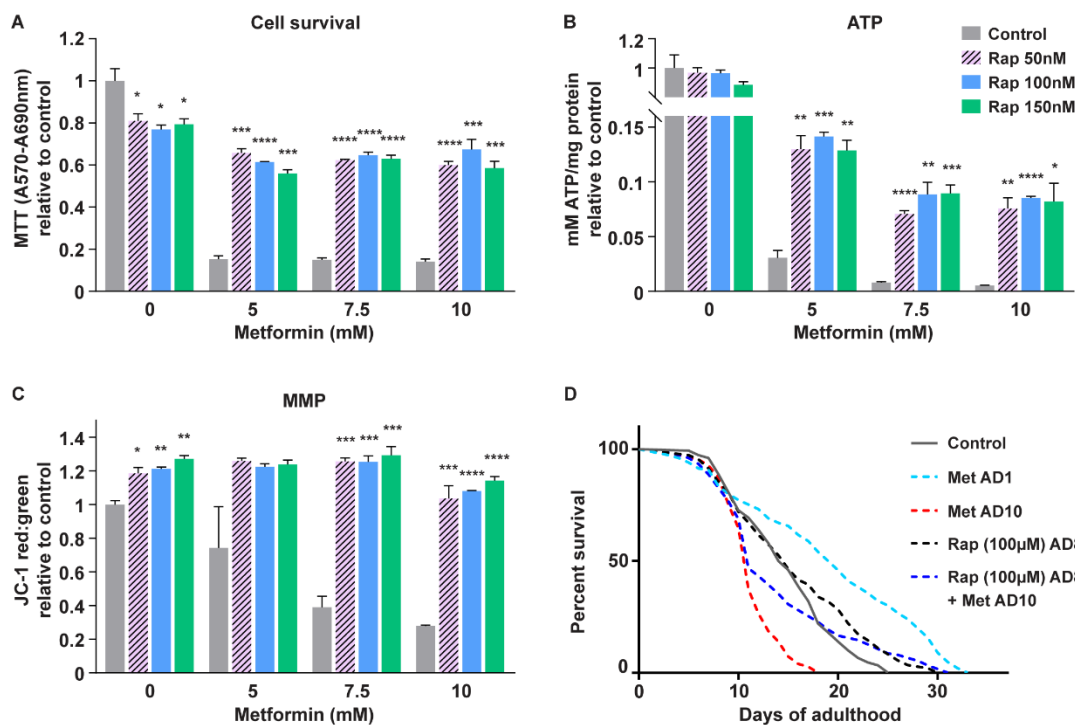

**Figure 7. Rapamycin co-treatment alleviates ATP exhaustion and toxicity triggered by metformin in late life.** Pre-senescent (PD44) primary human fibroblasts were pre-treated with indicated doses of rapamycin (Rap) for 24h followed by co-treatment with indicated doses of metformin for 24 (A) and 20 (B, C) hours; cell survival (A), ATP content (B) and mitochondrial membrane potential (C) were measured; values are relative to the respective untreated control (no rapamycin, no metformin) for each assay. (D) WT nematodes were pre-treated with 100µM rapamycin from adulthood day 8 (AD8) followed by co-treatment with 50mM metformin from AD10, survival was scored daily. For D significance was measured by log-rank test; all n numbers (n≥100 in all cases) and statistical values are presented in Table S1. For A-C, n=3 mean and SEM are presented, two-tailed unpaired t-test was used for the statistical analysis, all statistical values are presented in Table S2; \* p<0,05; \*\* p<0,01; \*\*\* p<0,001; \*\*\*\* p<0,0001.



|   |                                                              |
|---|--------------------------------------------------------------|
| 1 | <b>Supplemental Materials</b>                                |
| 2 |                                                              |
| 3 | Materials and Methods                                        |
| 4 | Figures S1-S16                                               |
| 5 | Tables S1 and S2                                             |
| 6 | Description of Tables S3 and S4 (provided as separate files) |
| 7 | Supplemental references                                      |
| 8 |                                                              |

## 1 **Materials and methods.**

2  
3 **Worm strains.** All strains were cultured according to standard conditions. Strains used  
4 were N2 Bristol (wild type), RB754 *aak-2(ok524)* X, VC3201 *afps-1(gk3094)* V, QV225  
5 *skn-1(zj15)* IV, MQ887 *isp-1(qm150)* IV, CB1370 *daf-2(e1370)* III and CB4037 *glp-*  
6 *1(e2141)* III. The following additional strains were used in the supplementary figures  
7 VC2654 *ubl-5(ok3389)* I, SJ4100 *zcls13 [hsp-6::GFP]* V, MAE10 *daf-2(e1370);daf-*  
8 *16(mu86)*, TJ356 *zls356 [daf-16p::daf-16a/b::GFP + rol-6(su1006)]* IV and VK1093  
9 *vkEx1093 [nhx-2p::mCherry::lgg-1]*.

10  
11 **Bacterial strains and growth conditions.** *E. coli* OP50 and *E. coli* HT115(DE3) were  
12 seeded on lysogeny broth (LB) agar plates and kept at 4 °C. Overnight cultures were  
13 grown at 37 °C in LB media without antibiotics and provided to worms on standard  
14 nematode growth medium (NGM) agar. The supplements were given in NGM agar:  
15 metformin (M2009 TCI), FCCP (15218 Cayman Chemical Company) and rapamycin  
16 (R0395 Sigma, R-5000 LC Laboratories). UV-killing was performed 24h after bacteria  
17 seeding by exposing the surface of the plates, without lids, to UV for 5 minutes  
18 (ChemiDOC XRS+ Bio-Rad); loss of viability was confirmed by subsequent liquid  
19 culture.

20  
21 **RNA interference treatments.** HT115 bacteria containing specific RNAi constructs  
22 were grown on lysogeny broth agar plates supplemented with ampicillin and tetracycline  
23 (Roth). Plates were kept at 4 °C. Overnight cultures were grown in lysogeny broth media  
24 containing ampicillin. RNAi expression was induced by adding 1 mM  
25 isopropylthiogalactoside (IPTG, Sigma) and incubating the cultures at 37 °C for 20 min  
26 before seeding bacteria on NGM agar supplemented with ampicillin and 3 mM IPTG.

27  
28 **Lifespan analysis.** The experiments were carried out at 20°C under standard  
29 laboratory conditions, unless stated otherwise. Synchronized L4 larvae were placed on  
30 60 mm dishes containing NGM agar and bacteria at a density of at least 70 worms per  
31 plate, two plates per condition (n≥140). Worms were transferred to new plates every  
32 other day until adulthood day 7 (AD7) and later transferred to new plates every 3 days.  
33 The number of dead animals was scored daily. Treatment with supplements including  
34 metformin was initiated by transfer of animals onto plates containing respective  
35 compounds. The analysis of the lifespan data including statistics was performed by  
36 using GraphPad Prism 7 software.

37  
38 **Sample preparation for proteomic analysis.** Approximately 500 age-synchronized  
39 worms per sample were used. Worms were collected in M9 buffer and pelleted; pellets  
40 were frozen at -80°C. Upon thawing the sample volume was adjusted to 100 µL with

1        PBS; samples were suspended in 2x lysis buffer (2x = 0.2M HEPES/pH 8; 2% SDC;  
2        0.2M DTT; 2mM EDTA) and subjected to a freeze-thaw cycle in liquid nitrogen followed  
3        by incubation at 95 °C with shaking at 500 rpm for 5 minutes. Samples were then  
4        sonicated in a Bioruptor (Diagenode, Belgium) (10 cycles with 1 minute on and 30s off  
5        with high intensity at 20°C). The lysates were clarified, and debris precipitated by  
6        centrifugation at 14000 rpm for 10 minutes. For reduction and alkylation of the proteins,  
7        the lysate supernatants were first incubated at 56 °C for 30 min with DTT (5 µL of a 100  
8        mM solution) and subsequently treated with iodacetamide (room temperature, in the  
9        dark, 20 minutes, 5 µL of a 200 mM solution). 10 % of the sample was removed to  
10        check lysis on a coomassie gel. The remaining 90% of the samples was treated with 1  
11        volume ice cold 100% TCA to 4 volumes sample and left to stand on ice for 30 minutes  
12        to precipitate the proteins. The samples were then centrifuged at 14000 rpm for 20  
13        minutes, 4 °C. After removal of the supernatant, the precipitates were washed once with  
14        1000 µL 10% TCA, vortexed, centrifuged again for 20 minutes at 4°C then washed twice  
15        (2 x 1000 µL) with ice cold (stored at -20 °C before use) acetone. Vortexing and  
16        centrifugation steps repeated as before. The pellets were then allowed to air-dry before  
17        being dissolved in digestion buffer (50 µL, 3M urea in 0.1M HEPES, pH 8; 1 µg LysC)  
18        and incubated for 4 h at 37 °C. Then the samples were diluted 1:1 with Milli-Q water (to  
19        reach 1.5 M urea) and were incubated with 1 µg trypsin for 16 h at 37 °C. The digests  
20        were then acidified with 10% trifluoroacetic acid and then desalted with Waters Oasis®  
21        HLB µElution Plate 30 µm (Waters Corporation, Milford, MA, USA) in the presence of a  
22        slow vacuum. In this process, the columns were conditioned with 3x100 µL solvent B  
23        (80% acetonitrile; 0.05% formic acid) and equilibrated with 3x 100 µL solvent A (0.05%  
24        formic acid in Milli-Q water). The samples were loaded, washed 3 times with 100 µL  
25        solvent A, and then eluted into PCR tubes with 50 µL solvent B. The eluates were dried  
26        down with the speed vacuum centrifuge and dissolved in 50 µL 5% acetonitrile, 95%  
27        Milli-Q water, with 0.1% formic acid. 20 µL was transferred to an MS vial and 1 µL of  
28        HRM kit peptides (Biognosys, Zurich, Switzerland) was spiked into each sample prior to  
29        analysis by LC-MS/MS.

30  
31        **LC-MS/MS.** Peptides were separated using the nanoAcquity UPLC system (Waters)  
32        fitted with a trapping (nanoAcquity Symmetry C<sub>18</sub>, 5µm, 180 µm x 20 mm) and an  
33        analytical column (nanoAcquity BEH C<sub>18</sub>, 1.7µm, 75µm x 250mm). The outlet of the  
34        analytical column was coupled directly to an Orbitrap Fusion Lumos (Thermo Fisher  
35        Scientific) using the Proxeon nanospray source. Solvent A was water, 0.1 % formic acid  
36        and solvent B was acetonitrile, 0.1 % formic acid. The samples (approx. 1 µg for DDA  
37        and 3 µg for DIA) were loaded with a constant flow of solvent A at 5 µL/min onto the  
38        trapping column. Trapping time was 6 minutes. Peptides were eluted via the analytical  
39        column with a constant flow of 0.3 µL/min. During the elution step, the percentage of  
40        solvent B increased in a non-linear fashion from 0 % to 40 % in 120 minutes. Total

1 runtime was 145 minutes, including clean-up and column re-equilibration. The peptides  
2 were introduced into the mass spectrometer via a Pico-Tip Emitter 360  $\mu\text{m}$  OD x 20  $\mu\text{m}$   
3 ID; 10  $\mu\text{m}$  tip (New Objective) and a spray voltage of 2.2 kV was applied. The capillary  
4 temperature was set at 300 °C. The RF lens was set to 30%. Data from each sample  
5 were first acquired in DDA mode for one of the replicates in order to create a spectral  
6 library. The conditions were as follows: Full scan MS spectra with mass range 350-1650  
7  $m/z$  were acquired in profile mode in the Orbitrap with resolution of 60000. The filling  
8 time was set at maximum of 50 ms with limitation of  $2e5$  ions. The “Top Speed” method  
9 was employed to take the maximum number of precursor ions (with an intensity  
10 threshold of  $5e4$ ) from the full scan MS for fragmentation (using HCD collision energy,  
11 30%) and quadrupole isolation (1.4 Da window) and measurement in the Orbitrap  
12 (resolution 15000, fixed first mass 120  $m/z$ ), with a cycle time of 3 seconds. The MIPS  
13 (monoisotopic precursor selection) peptide algorithm was employed but with relaxed  
14 restrictions when too few precursors meeting the criteria were found. The fragmentation  
15 was performed after accumulation of  $2e5$  ions or after filling time of 22 ms for each  
16 precursor ion (whichever occurred first). MS/MS data were acquired in centroid mode.  
17 Only multiply charged ( $2^+$  -  $7^+$ ) precursor ions were selected for MS/MS. Dynamic  
18 exclusion was employed with maximum retention period of 15 s and relative mass  
19 window of 10 ppm. Isotopes were excluded. In order to improve the mass accuracy,  
20 internal lock mass correction using a background ion ( $m/z$  445.12003) was applied. For  
21 data acquisition and processing of the raw data Xcalibur 4.0 (Thermo Scientific) and  
22 Tune version 2.1 were employed.

23  
24 For the DIA data acquisition the same gradient conditions were applied to the LC as for  
25 the DDA and the MS conditions were varied as described: Full scan MS spectra with  
26 mass range 350-1650  $m/z$  were acquired in profile mode in the Orbitrap with resolution  
27 of 120000. The filling time was set at maximum of 20 ms with limitation of  $5e5$  ions. DIA  
28 scans were acquired with 34 mass window segments of differing widths across the MS1  
29 mass range with a cycle time of 3 seconds. HCD fragmentation (30% collision energy)  
30 was applied and MS/MS spectra were acquired in the Orbitrap with a resolution of  
31 30000 over the mass range 200-2000  $m/z$  after accumulation of  $2e5$  ions or after  
32 filling time of 70 ms (whichever occurred first). Ions were injected for all available  
33 parallelizable time). Data were acquired in profile mode.

34  
35 For the second experiment (young wild-type, *daf-2(e1370)* and *daf-2(e1370); daf-*  
36 *16(mu86)* worms), the following changes were made to the data acquisition: data were  
37 acquired instead on a QE-HFX MS (Thermo), connected to an M-Class nanoacquity  
38 (Waters). Columns/solvents/gradients and source settings were all the same as for the  
39 Lumos. DDA data were acquired on a subset of samples from all conditions, with the  
40 following settings changes compared to Lumos: MS1 fill time was 20 ms, AGC target

1 3e6. Top N was used (=15) and the intensity threshold was 4e4. Normalized Collision  
2 Energy (NCE) with HCD was set to 27% and a 1.6 Da window was used for quadrupole  
3 isolation. MS2 data were acquired in profile mode from 200 – 2000 *m/z*. MS2 fill time  
4 was 25 ms or an AGC target of 2e5. Only 2-5+ charge states were selected for MS/MS.  
5 Dynamic exclusion was 20s, and the peptide match “preferred” option was selected. For  
6 the DIA data, LC conditions remained unchanged and the following changes were made  
7 for the MS: fill time for MS1 was 60ms, with an AGC target of 3e6. DIA segments in  
8 MS2 were acquired for 40ms or AGC target of 3e6 at a fixed first mass of 200 *m/z*.  
9 Stepped HCD NCEs of 25.5, 27 and 30 % were employed.

10  
11 **Proteomics data analysis.** For library creation, the DDA data was searched using  
12 MaxQuant (version 1.5.3.28; Martinsreid, Germany). The data were searched against a  
13 species specific (*C. elegans*) UniProt database with a list of common contaminants  
14 appended, as well as the HRM peptide sequences. The data were searched with the  
15 following modifications: Carbamidomethyl (C) (Fixed) and Oxidation (M)/ Acetyl (Protein  
16 N-term) (Variable). The mass error tolerance for the full scan MS and MS/MS spectra  
17 was set at 20 ppm. A maximum of 1 missed cleavage was allowed. The identifications  
18 were filtered to satisfy a false discovery rate of 1 % on peptide and protein level.

19  
20 A spectral library was created from the MaxQuant output of the DDA runs combined  
21 using Spectronaut (version 10, Biognosys, Switzerland). This library contained 58296  
22 precursors, corresponding to 4624 protein groups using Spectronaut protein inference.  
23 DIA data were then uploaded and searched against this spectral library. For the second  
24 experiment, DDA and DIA data were directly searched in Spectronaut Pulsar X, with the  
25 same database and settings applied as for MaxQuant to create a DpD library against  
26 which this data was searched. This library contained 75365 precursors corresponding to  
27 5287 protein groups.

28  
29 Relative quantification was performed in Spectronaut for each pairwise comparison  
30 (such as young 24h metformin treated versus young 24h untreated or old 48h metformin  
31 treated versus old 48h untreated) using the triplicate samples (4-5 replicates for the  
32 second experiment) from each condition. The data (candidate table with Log2 fold  
33 changes and Q values for each pairwise comparison) was then exported to Excel  
34 (presented as Table S3) and further data analyses and visualization (such as Venn  
35 diagrams, scatter plots and box plots) were performed with R-studio (version 0.99.902)  
36 using in-house pipelines and scripts.

37  
38 **Lipidomics analysis by UPLC-MS/MS.** Young and old wild type animals ( $n \geq 700$ ) were  
39 treated with 50mM metformin (or vehicle) for 24 hours. For the analysis lipids were  
40 extracted by successive addition of PBS pH 7.4, methanol, chloroform, and saline and

1 then separated on an Acquity UPLC BEH C8 column (1.7  $\mu\text{m}$ , 2.1  $\times$  100 mm) using an  
2 Acquity UPLC system (Waters). The UPLC system was coupled to a QTRAP 5500  
3 mass spectrometer (Sciex) equipped with an electrospray ionization source to detect  
4 the fatty acid anion fragments of glycerophospholipids by multiple reactions monitoring  
5 in the negative ion mode. Free fatty acids were quantified by single ion monitoring in the  
6 negative ion mode, and triacylglycerols were analyzed based on transitions of  $[\text{M}+\text{NH}_4]^+$   
7 to  $[\text{M-fatty acid anion}]^+$  fragments. Specifically, phospholipids were analyzed as  
8 described in (Koeberle et al., 2013) and triglycerides were assessed as described in  
9 (Koeberle et al., 2015). Absolute intensities are defined as summarized signal  
10 intensities of all detected species of a given lipid type (e.g. all free fatty acids)  
11 normalized to the internal standard and the number of worms. Relative intensities are  
12 defined as proportions of individual lipid signals (e.g. individual triglyceride subtypes)  
13 relative to total signal intensity for a given lipid type (e.g. total triglycerides).

14  
15 **Lipid staining.** Oil Red O (Sigma) preparation and staining was performed as  
16 previously described (Han et al., 2017). After staining the animals were mounted onto  
17 2% agar pads and imaged by using the Axio Scan.Z1 machine (Carl Zeiss) at 20x  
18 magnification coupled to the HV-F202SCL color camera (Hitachi). The same exposure  
19 and z-stack settings were used across all conditions and experiments. The images were  
20 split by using the Zen2.6 software (Carl Zeiss) and quantified by using ImageJ (NIH):  
21 each raw image was background-subtracted, greyscale-converted and inverted for  
22 quantification as previously described (Han et al., 2017), frontal anterior areas of the  
23 intestine (half the animal length) were outlined and quantified in each case.  
24 Measurement of Oil Red O mean intensity per worm was performed using the automatic  
25 “Analyze Measure” feature of the ImageJ software. For each image (animal) the  
26 background was subtracted, and mean grey values were plotted as arbitrary units (a.u.).

27  
28 **Fluorescence microscopy.** *hsp-6::GFP* worms were age-synchronized and L1 larvae  
29 were fed with bacteria containing empty vector (EV), *mip-1* RNAi (Ahringer library) or  
30 EV supplemented with 50mM metformin. Worms were incubated at 20°C and imaged  
31 on adulthood day 1 (AD1) using AxioZom\_V16 microscope (Zeiss) at 90X magnification.  
32 Worms were immobilized by exposure to ice for 20 minutes prior to imaging.  
33 *daf16a/b::GFP* reporter worms were synchronized and fed with OP50 *E. coli*. On AD1,  
34 worms were transferred onto plates supplemented with 50mM metformin or control  
35 plates. Heat stress was used as a positive control: AD1 worms were exposed to 35.7°C  
36 for 3h (BF115 incubator, Binder) and imaged at indicated times at 20°C. For the old age  
37 group, worms were transferred onto metformin or control plates on AD8 and scored on  
38 AD10. We used AxioZoom\_V16 microscope (Zeiss) for scoring and imaging (250X  
39 magnification), n=100 worms were imaged per each condition. *mCherry::lgg-1* reporter  
40 worms were treated with 50mM metformin or transferred to control plates and the

1 number of puncta per animal was scored after 6, 12 and 24h of treatment.  
2 AxioZoom\_V16 microscope (Zeiss) was used for imaging (160X magnification), n=10  
3 worms were imaged per each condition.

4  
5 **ATP content.** Systemic ATP levels in *C. elegans* were measured as previously  
6 described (Artal-Sanz and Tavernarakis, 2009), with small modifications. Briefly, 50  
7 worms per sample were collected, washed with S-basal buffer, and snap frozen in 50µl  
8 S-basal buffer using liquid nitrogen before final storage at -80°C. Two biological  
9 replicates were collected per condition. AD1 and AD10 frozen worms were boiled for 15  
10 minutes at 100°C, cooled to RT, sonicated and centrifuged to pellet debris. The  
11 supernatant was then collected to fresh tubes and diluted tenfold before measurement.  
12 50µl of each sample was transferred in triplicate to a 96 well flat bottom black plate and  
13 ATP content was determined using Roche ATP Bioluminescence Assay Kit HSII  
14 (Sigma) and a luminometer plate reader with injection system (Mithras LB940, Berthold  
15 Technologies). 50µl of luciferase reagent was injected per well and the light signal was  
16 integrated for 10s after a delay of 1s. ATP levels were normalized to total protein  
17 content (A280nm in NanoDrop (Thermo Fischer). Extraction of ATP from human cells  
18 was performed according to the kit supplier's protocol. Briefly, cells were seeded and  
19 treated in 96 well plates and, after treatment, culture media was removed and cells were  
20 washed twice with HBSS to remove any traces of FBS and lysed with 100 µl of cell lysis  
21 reagent (Roche ATP Bioluminescence Assay Kit HSII, Sigma). Lysate supernatant was  
22 diluted tenfold and measurement was done as explained above for worms. Resulting  
23 ATP levels were normalized to total protein content determined with Pierce BCA Protein  
24 Assay Kit (Thermo Fischer).

25  
26 **Cell culture.** BJ human skin fibroblasts were maintained in DMEM high glucose media  
27 with L-glutamine and pyruvate supplemented with 10% of fetal bovine serum (FBS) (all  
28 from Sigma). For cell culture assays cells were seeded in complete DMEM on 96 well  
29 plates, flat bottom, at a density of 20.000 cells per well. Cells were left overnight for  
30 proper cell attachment and the different treatments were then performed for the times  
31 indicated. For pre-treatment with rapamycin complete DMEM was used. For treatment  
32 with metformin (plus or without supplements), cells were first washed with HBSS and  
33 media was replaced with DMEM without glucose, L-glutamine or phenol red, and  
34 supplemented with 10% FBS. For FCCP (Sigma) and rapamycin co-treatments, control  
35 cells were treated with vehicle dimethylsulfoxide (DMSO, Sigma). DMSO concentrations  
36 did not exceed 0,05%. All incubations and culturing were done in a humidified 37°C, 5%  
37 CO2 incubator (BBD6220, Thermo Scientific).

38  
39 **Cell survival.** 25µl of a filtered 5mg/mL stock solution of MTT (Sigma) was added to  
40 each cell containing well to a final concentration of 1mg/mL. Plates were wrapped in

1 aluminum foil to protect from light and incubated for 2h (37 °C, 5% CO<sub>2</sub>). MTT media  
2 was then removed and replaced by MTT solubilization solution (0.1N HCL in absolute  
3 isopropanol). Absorbance of the converted dye was measured at 570nm with  
4 background subtraction at 690nm using a plate-reading spectrophotometer (Infinite  
5 M200 Pro, Tecan).

6  
7 **Cell death.** Quantification of cell death was performed with the Pierce LDH Cytotoxicity  
8 Assay kit (Thermo Scientific). After cell treatment 50µl of each sample medium was  
9 transferred to a new 96 well plate (flat bottom) and mixed with 50µl of Reaction Mixture.  
10 After 30-minute incubation at RT 50µl of Stop Solution was added. Absorbance was  
11 measured at 490nm with background subtraction at 680nm using a plate-reading  
12 spectrophotometer (Infinite M200 Pro, Tecan). % of cytotoxicity was calculated as  
13 indicated in the kit.

14  
15 **Mitochondrial membrane potential.** Drug-induced changes of mitochondrial  
16 membrane potential (MMP) were assessed using JC-1 dye (Thermo Fischer). In cells  
17 with healthy mitochondria, JC-1 forms J-aggregates with red fluorescence. However, in  
18 damaged cells with low MMP JC-1 remains in the green fluorescent monomeric form.  
19 Fluorescence intensities were measured with a plate-reading spectrophotometer  
20 (Infinite M200 Pro, Tecan) and loss of MMP was determined by calculating JC-1  
21 red:green fluorescence ratio.

22  
23 **Seahorse analysis.** Mitochondria function parameters such as the oxygen consumption  
24 rate (OCR) and extracellular acidification rate (ECAR) were measured in real time,  
25 using Agilent Seahorse XF24 Analyzer according to the protocol provided by Agilent  
26 Technologies. Briefly, cells were seeded in XF24 TC-treated cell culture microplates  
27 (Agilent Technologies) and left overnight to adhere and grow until confluence. As for the  
28 other cell assays in this manuscript, cells were seeded in complete DMEM and further  
29 treated with metformin in DMEM with 10%FBS but without glucose, L-glutamine or  
30 phenol red for the indicated time. After treatment, cells were washed 2x and incubated  
31 for 1h at 37°C in a non-CO<sub>2</sub> incubator with XF base media (Agilent Technologies)  
32 supplemented with glutamine 2mM, pyruvate 1mM and glucose 10mM (all Agilent  
33 Technologies). The sensor cartridge of the XFe24 extracellular flux assay kit (Agilent  
34 Technologies) was left hydrating in XF calibrant at 37°C in a non-CO<sub>2</sub> incubator  
35 overnight. The modulators of respiration were prepared fresh and loaded into the sensor  
36 cartridge injection ports immediately before the assay at the following concentrations:  
37 Oligomycin 1µM (port 1), FCCP 6 µM (port2) and Rotenone/Antimycin-A 0,5 µM each  
38 (port 3) (all from Sigma). Assays were run and result analyses were done using  
39 Seahorse Wave software (Agilent Technologies). Equal cell number in young and old  
40 cultures was ensured by nuclear (DAPI, Sigma) staining prior to running the tests. All



1 calculated values were normalized to total protein content of exact corresponding wells  
2 measured with Pierce BCA Protein Assay Kit (Thermo Fischer).

3  
4 **Statistical analysis.** For all lifespan experiments, median survival was calculated and  
5 statistical significance was determined by using both log-rank (Mantel-Cox) and Gehan-  
6 Breslow-Wilcoxon tests. For lipid content, ATP levels, survival, cell death and JC-1  
7 assays unpaired t-tests with two-tailed distribution were performed to evaluate statistical  
8 significance. Error bars represent standard deviation of the mean in all cases. Statistical  
9 calculations were performed by using GraphPad Prism 7 in all cases except proteomics  
10 analysis. Worms of a given genotype were randomly selected from large populations for  
11 each experiment without any preconditioning. Blinding was not applied as the  
12 experiments were carried out under highly standardized and predefined conditions such  
13 that an investigator-induced bias can be excluded.

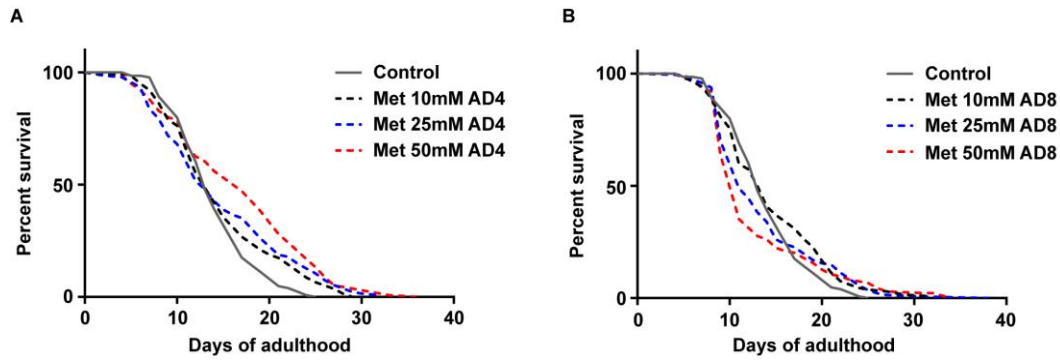

1  
2  
3  
4  
5  
6  
7  
8  
9

**Figure S1. Life extending properties of metformin deteriorate with age.** Wild type (WT, N2 Bristol strain) worms were treated with indicated doses of metformin (Met) from day 4 (**A**) and day 8 (**B**) of adulthood (AD4 and AD8 respectively), survival was scored daily. Significance was determined by log-rank test, all n numbers ( $n \geq 100$  in all cases) and statistical values are presented in Table S1. Each experiment was repeated  $\geq 3$  times; one representative result is shown in each case.

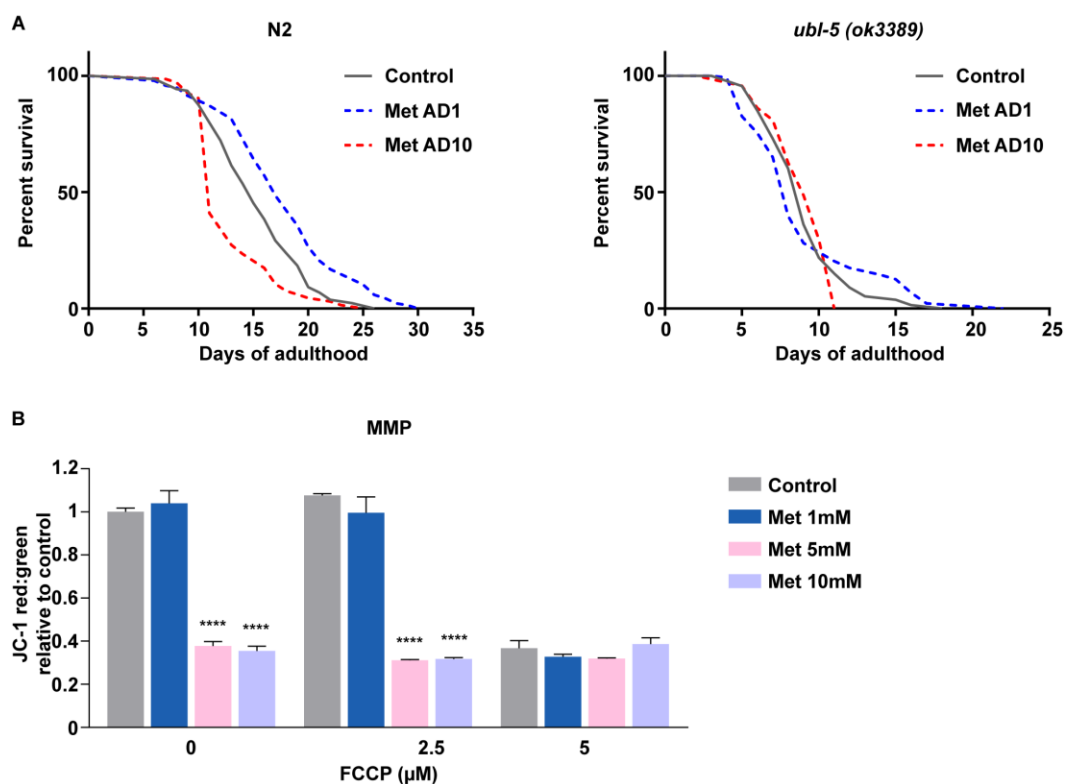

**Figure S2. Mitochondrial impairments pre-dispose nematodes and human cells to metformin toxicity.** (A) WT animals (left panel) and *ubl-5(ok3389)* mutants (right panel) were treated with 50mM metformin on days 1 and 10 of adulthood (AD1 and AD10 respectively), survival was scored daily. (B) Early passage (population doubling, PD37) fibroblasts were treated with indicated doses of metformin (Met) in absence or presence of indicated concentrations of FCCP for 24 hours; mitochondrial membrane potential was measured by JC-1 staining. All values are relative to the untreated control (no FCCP, no metformin). DMSO was used as vehicle control for FCCP, the own effect of the vehicle is seen at 0 $\mu$ M FCCP. Grey bars depict the effect of FCCP alone (metformin-independent) on the mitochondrial membrane potential (MMP), proof of concept MMP decline is seen at 5 $\mu$ M FCCP. For **A** significance was calculated by log-rank test, all n numbers (n $\geq$ 100 in all cases) and statistical values are presented in Table S1; for **B** n=3, mean and SEM are presented; two-tailed unpaired t-test was used for the statistical analysis, statistical values are shown in Table S2; \*\*\*\* p<0,0001.

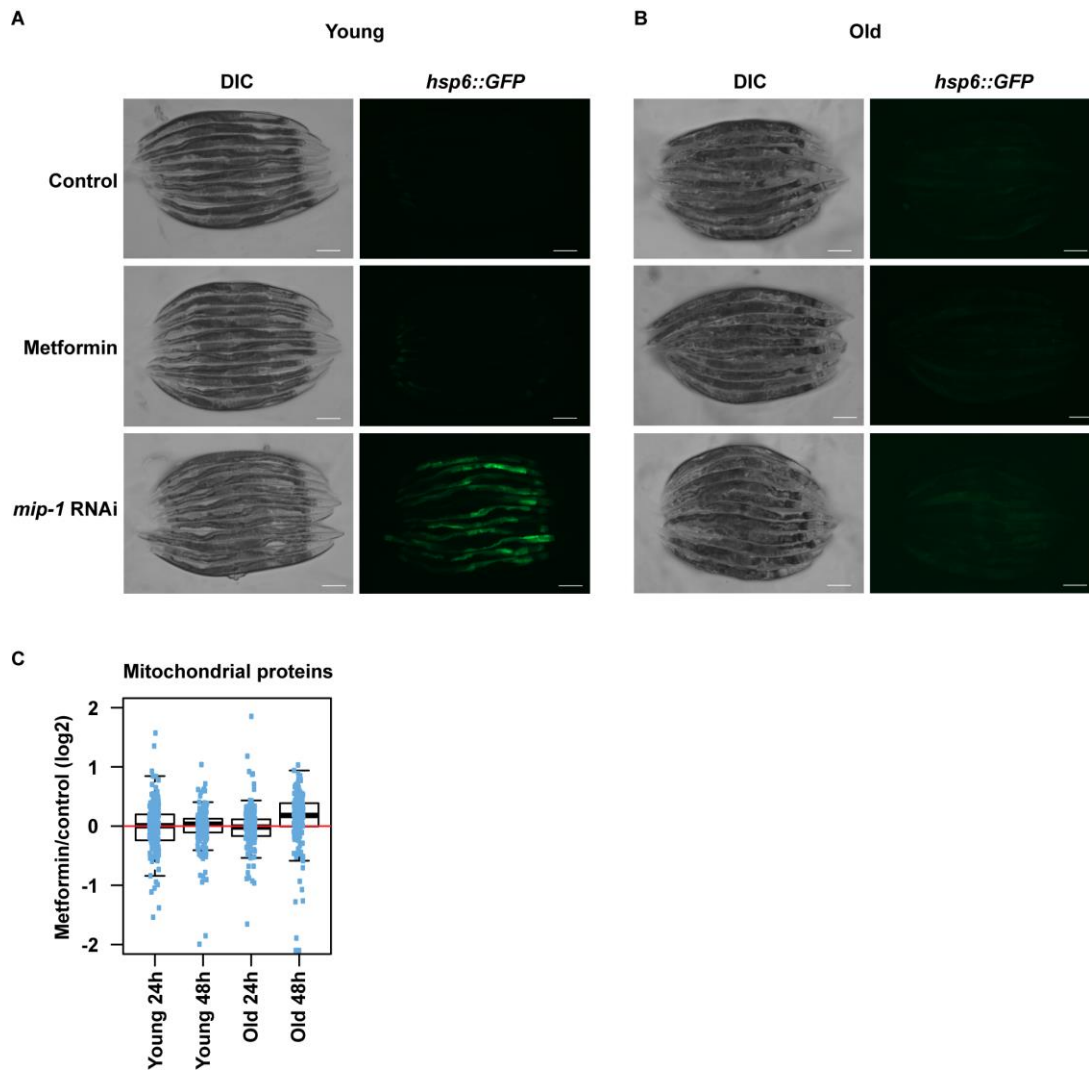

1  
2  
3 **Figure S3. Metformin treatment doesn't induce mitochondrial unfolded protein**  
4 **response or a decrease of mitochondrial content indicative of mitophagy.** Day 1  
5 (A) and day 10 (B) adult transgenic nematodes (young and old respectively) expressing  
6 GFP under control of the *hsp-6* gene promoter were treated with 50mM metformin or  
7 grown in presence of *mip-1* RNAi (positive control). GFP expression was assessed by  
8 microscopy after 24h of metformin treatment. The experiment was repeated 3 times,  
9 representative result is shown, scale bar is 200 $\mu$ m. (C) Young and old animals were  
10 treated with 50mM metformin and changes of mitochondrial protein levels were  
11 measured by mass spectrometry at 24h and 48h of treatment. Dots represent individual  
12 mitochondrial proteins, mean fold change value (taking all detected mitochondrial  
13 proteins in consideration) is shown in bold, the upper and lower limits of the boxplot  
14 indicate the first and third quartile, respectively, and whiskers extend 1.5 times the  
15 interquartile range from the limits of the box. All fold changes were calculated against  
16 age- and time point matched untreated controls (for both 24h and 48h of treatment).

- 1 The complete list of proteins used for the boxplot analysis along with individual fold
- 2 changes and statistical values is reported in Table S3.

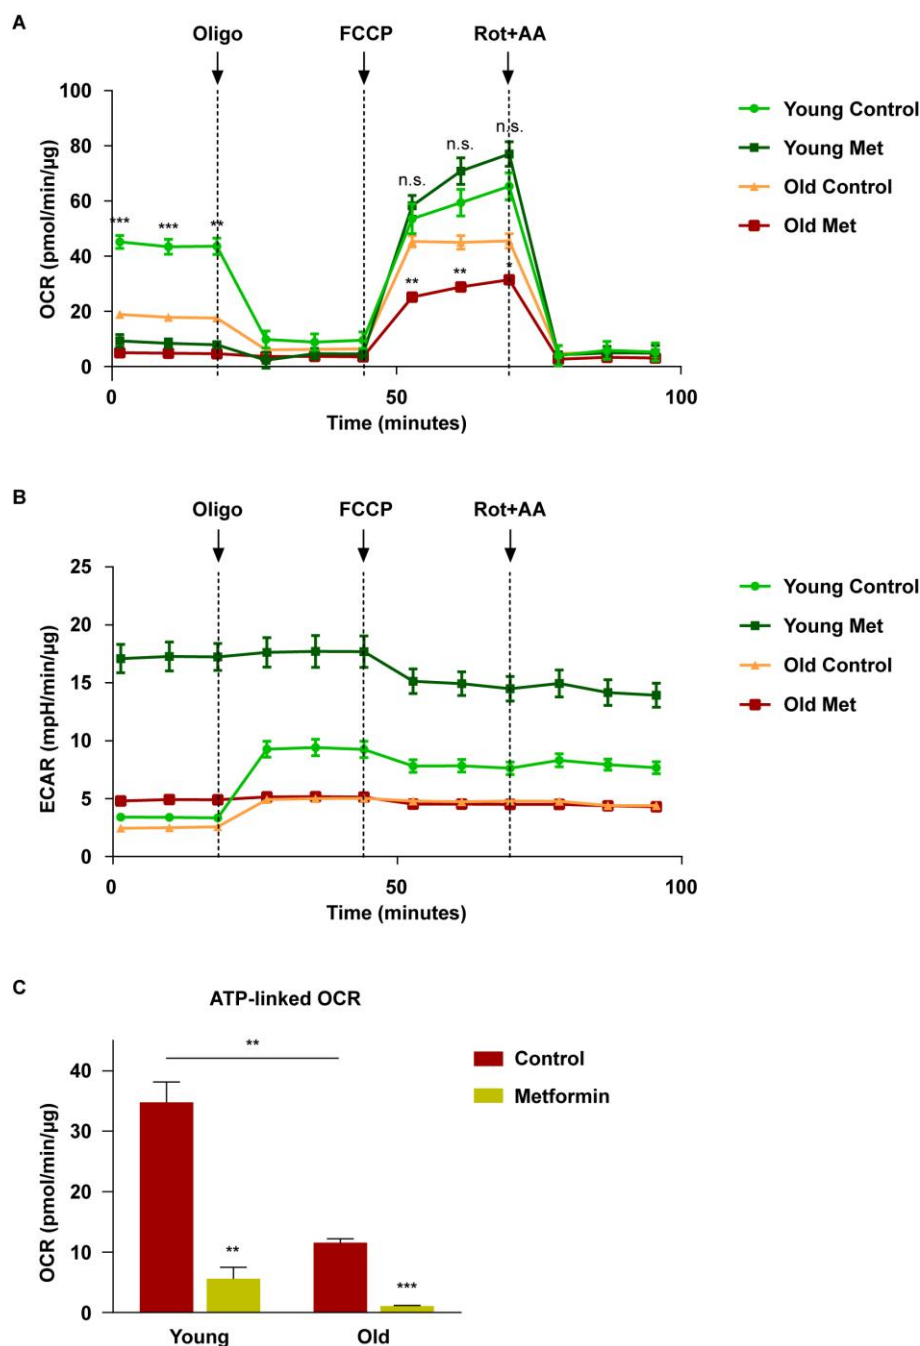

1  
2  
3  
4  
5  
6  
7  
8  
9  
10

**Figure S4. Metformin induces a distortion of energy metabolism in old human primary cells.** Young (PD29) and old (PD61) primary human skin fibroblasts were treated with metformin for 16h, then washed and pre-incubated with media containing high glucose (10mM), glutamine (2mM) and pyruvate (1mM); Seahorse analysis of OXPHOS (A) and glycolysis (B) was performed by measuring continuous oxygen consumption rates (OCR) and extracellular acidification rates (ECAR), respectively, following injection of oligomycin (1mM), FCCP (3mM), antimycin-A (0,5mM) and rotenone (0,5mM). The recorded values were normalized to protein content. (C) ATP-

1 linked OCR was calculated by comparison of basal OCR and OCR following oligomycin  
2 (ATP synthase inhibitor) injection. For **A-C** n=3, mean and SEM are presented; two-  
3 tailed unpaired t-test was used for the statistical analysis (**A**, **C**), all statistical values are  
4 presented in Table S2; \* p<0,05; \*\* p<0,01; \*\*\* p<0,001.  
5

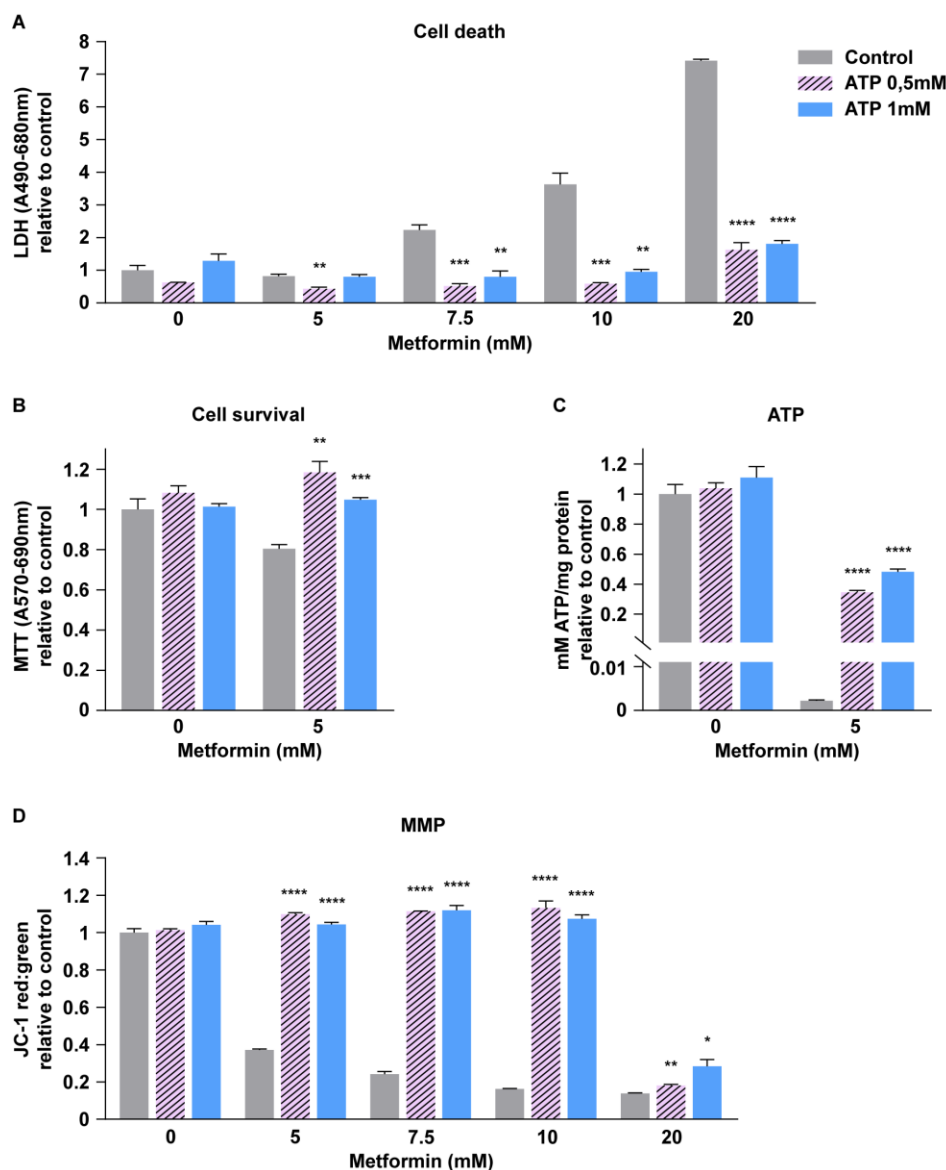

**Figure S5. Ectopic ATP supplementation alleviates metformin toxicity in human primary fibroblasts.** Pre-senescent (PD44) primary human skin fibroblasts were treated with indicated doses of metformin in presence or absence of indicated concentrations of ATP for 24h hours; cell death (**A**, LDH assay), cell survival (**B**, MTT assay), ATP content (**C**) and mitochondrial membrane potential (**D**, JC-1 assay) were measured; the data are complementary to Fig. 3I-J; values are relative to the respective untreated control (no ATP, no metformin) for each assay. The data from cells treated with 5mM metformin demonstrates that ATP exhaustion and loss of mitochondrial membrane potential precede metformin-triggered cell death. n=3, mean and SEM are presented, two-tailed unpaired t-test was used for the statistical analysis, statistical values are shown in Table S2; \* p<0,05; \*\* p<0,01; \*\*\* p<0,001; \*\*\*\* p<0,0001.



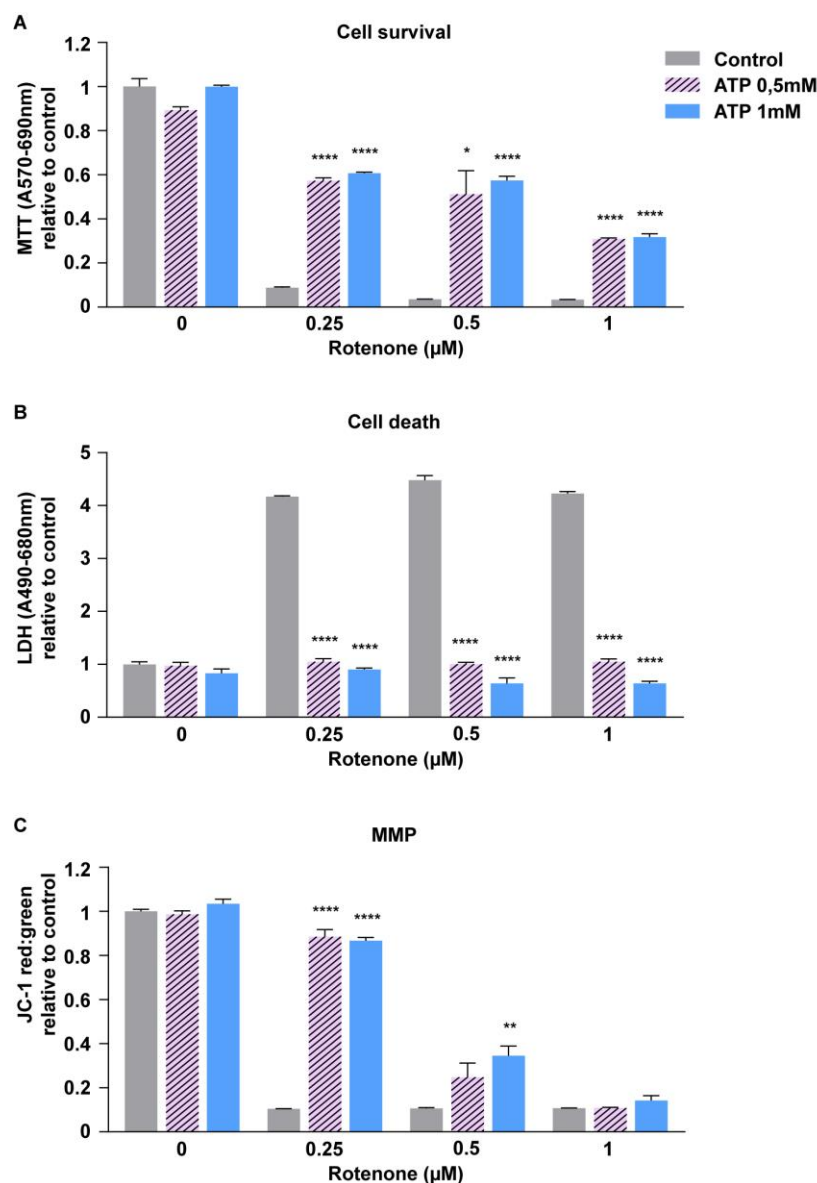

1  
2  
3 **Figure S6. Ectopic ATP supplementation alleviates the toxicity of ETC complex I**  
4 **inhibitor rotenone in human primary fibroblasts.** Pre-senescent primary human skin  
5 fibroblasts were treated with indicated doses of rotenone for 21 hours; cell survival (A,  
6 MTT assay), cell death (B, LDH assay), and mitochondrial membrane potential (C, JC-1  
7 assay) were measured. Values relative to the respective untreated control (no ATP, no  
8 rotenone) are shown for all assays. n=3, mean and SEM are presented, two-tailed  
9 unpaired t-test was used for the statistical analysis, statistical values are shown in Table  
10 S2; \* p<0,05; \*\* p<0,01; \*\*\*\* p<0,0001.  
11

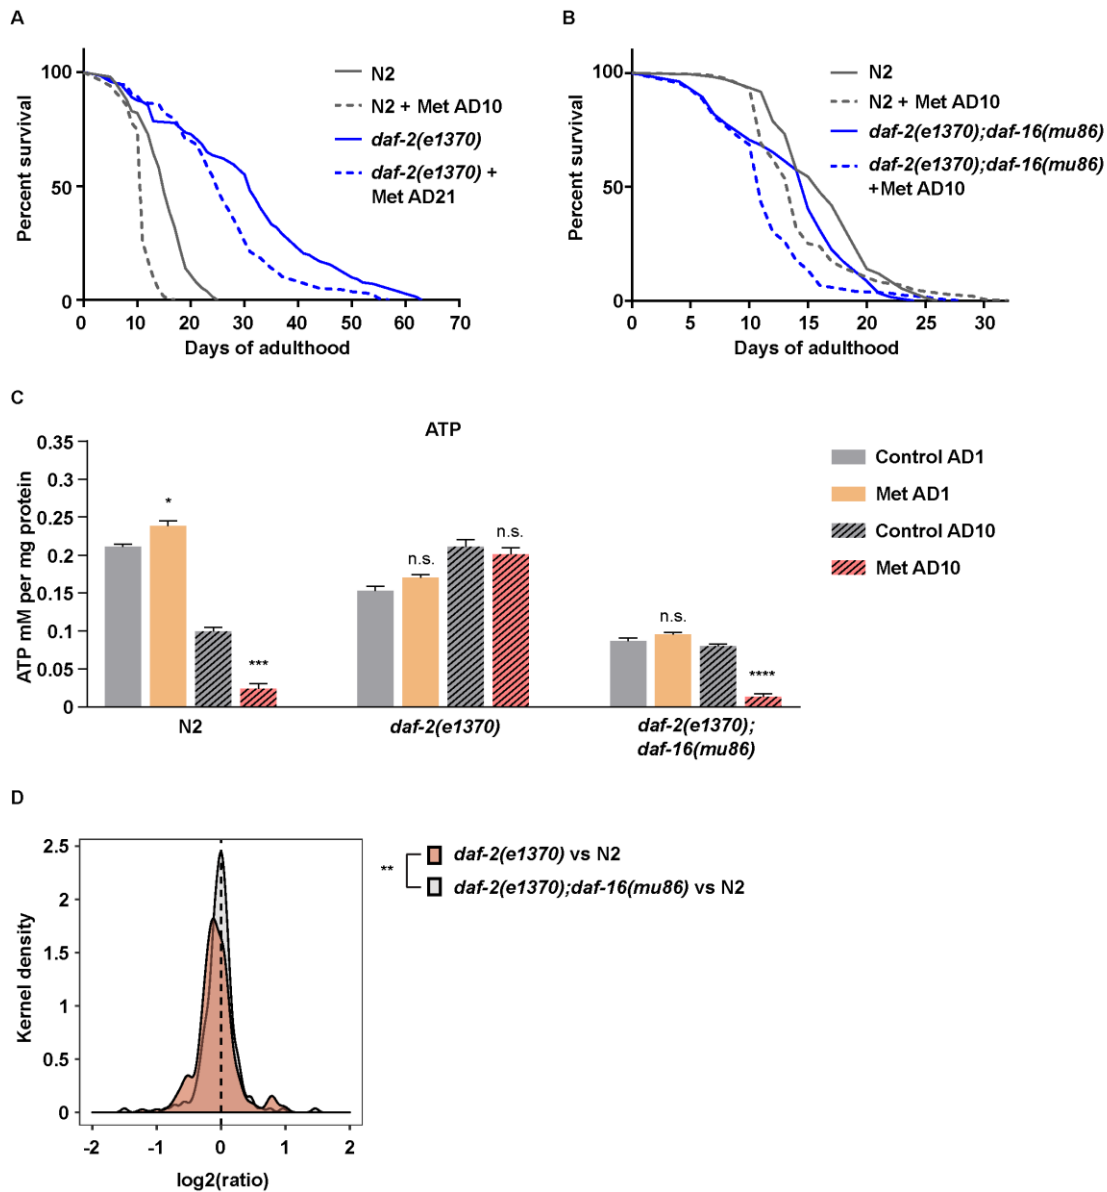

**Figure S7. DAF-16/FOXO is required for the enhanced resistance of insulin receptor deficient animals to late life metformin toxicity.** (A) *daf-2(e1370)* mutant animals were treated with 50mM metformin (Met) on adulthood day 21 (AD21) along with AD10 wild type (N2 Bristol strain) control animals, survival was scored daily. (B) *daf-2(e1370);daf-16(mu86)* mutant animals were treated with 50mM metformin on adulthood day 10 (AD10) along with age-matched wild type controls, survival was scored daily. (C) Whole organism ATP levels were measured in wild type, *daf-2(e1370)* and *daf-2(e1370);daf-16(mu86)* mutant animals treated with 50mM metformin on AD1 and AD10, the measurement was performed after 36h of metformin exposure; the data are complementary to Fig. 4C, all presented whole animal ATP measurements were performed in parallel to ensure comparability. (D) The proteome of young (AD2) wild

1 type, *daf-2(e1370)* and *daf-2(e1370);daf-16(mu86)* animals was analyzed by mass  
2 spectrometry; log<sub>2</sub> fold changes (relative to wild type) of mitochondrial proteins (214 in  
3 total) were compared between the *daf-2(e1370)* and *daf-2(e1370);daf-16(mu86)* mutant  
4 strains. The distribution of log<sub>2</sub> fold changes shows reduced abundance of mitochondrial  
5 proteins in *daf-2(e1370)* mutants, while *daf-2(e1370);daf-16(mu86)* mutants show  
6 mitochondrial protein levels comparable to wild type. For **A-B** significance was  
7 measured by log-rank test; n numbers (n≥100 in all cases) and statistical values are  
8 presented in Table S1. For **C** n=100, mean and SEM are presented, two-tailed unpaired  
9 t-test was used for the statistical analysis, all statistical values are presented in Table  
10 S2. For **D** 5 independent pools of worms (n≥500 in each) were measured for each  
11 strain, the complete data is presented in Table S3. The Wilcoxon rank sum test was  
12 used to assess significance between the log<sub>2</sub> fold change distributions. \* p<0.05; \*\*\*  
13 p<0.001; \*\*\*\* p<0.0001.

14 .

15

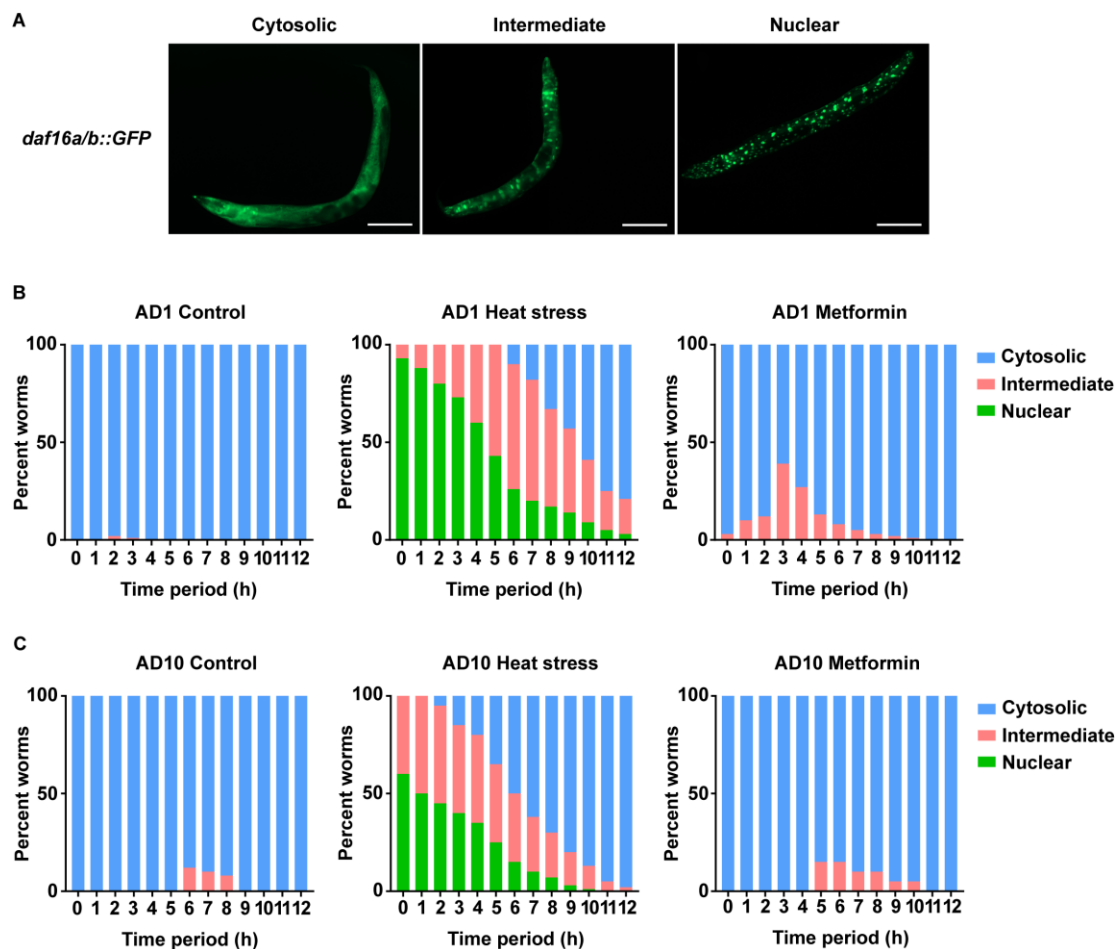

**Figure S8. Metformin doesn't induce DAF-16/FOXO nuclear translocation.** Young (AD1) (**B**) and old (AD10) (**C**) transgenic nematodes expressing DAF-16::GFP fusion protein were treated with 50mM metformin or transient heat stress and DAF-16 sub-cellular localization was assessed by microscopy every hour; % of worms with specific localizations were quantified, n=100 for each condition, 4 independent tests were done and one representative result is shown. (**A**) representative images of DAF-16::GFP sub-cellular localizations used for the assessment in **B** and **C** are shown, scale bar is 100µm.

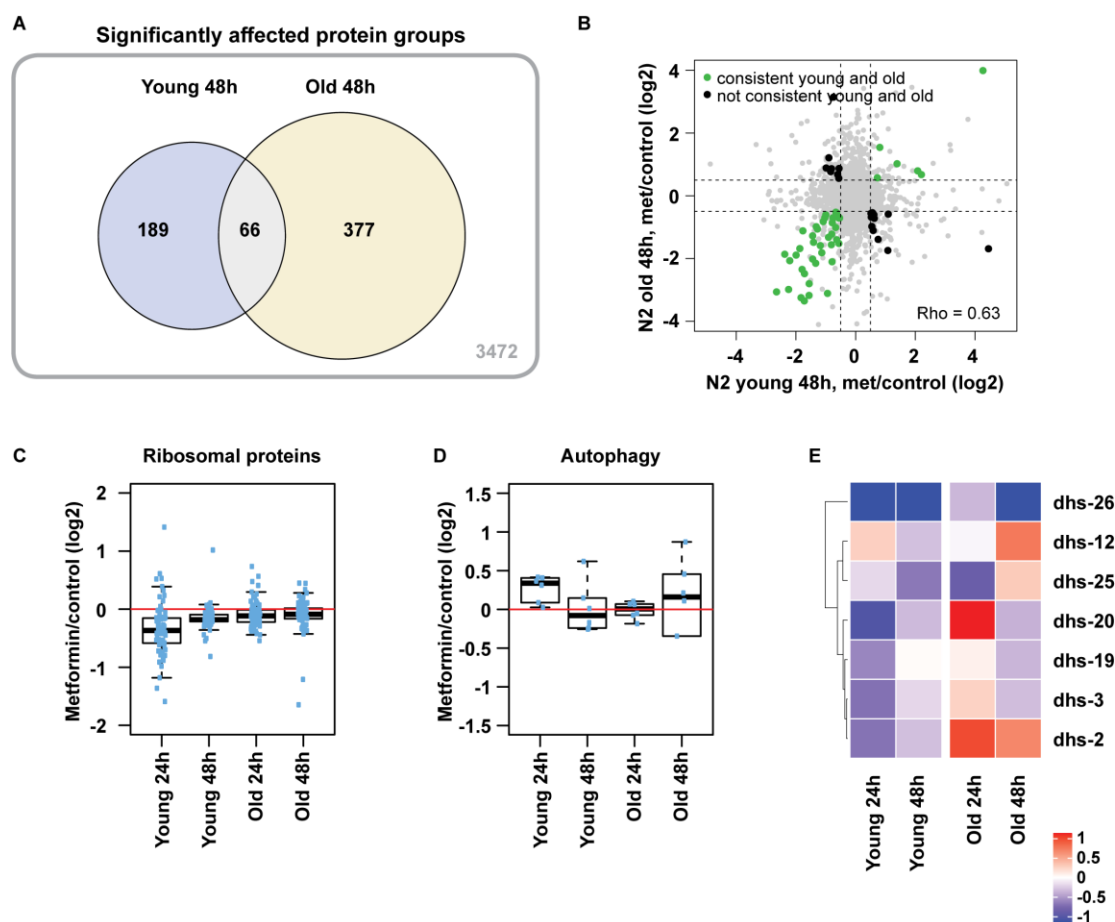

1  
 2  
 3  
 4 **Figure S9. The induction of longevity assurance pathways and metabolic**  
 5 **adaptations by metformin is age-dependent.** Wild type worms were treated with  
 6 50mM metformin on adulthood day 1 (young) and 10 (old). **(A)** Venn diagram showing  
 7 overlap between significantly altered proteins after 48h of early and late life metformin  
 8 treatment is shown; the circled values include all proteins with absolute log2 fold change  
 9 above 0.5 and Q value below 0.25; the number in the outside box indicates non-  
 10 regulated proteins detected in both young and old samples collected at 48h; fold  
 11 changes were calculated against age- and time point matched untreated controls. Three  
 12 independent pools of worms were analyzed for each sample group. **(B)** Scatter plot  
 13 comparing log2 fold changes of individual proteins (shown as dots) after 48h of  
 14 metformin treatment at young and old age is shown. Proteins significantly regulated at  
 15 both ages are highlighted with color: the green-highlighted proteins are consistently  
 16 regulated at both ages while black-highlighted ones are regulated in the opposite  
 17 direction between young and old age. The correlation coefficient (Rho) between young  
 18 and old responses taking into account all regulated proteins is shown. Boxplots showing  
 19 fold changes for selected ribosomal proteins **(C)** and proteins involved in general  
 20 autophagy **(D)** are presented. The median fold change of the proteins belonging to each  
 group is shown as a bold line, the upper and lower limits of the boxplot indicate the first

1 and third quartile, respectively, and whiskers extend 1.5 times the interquartile range  
2 from the limits of the box. **(H)** Heatmaps of selected dehydrogenases are shown; only  
3 fold changes with significance in at least one age/treatment combination are depicted.  
4  $n \geq 500$  per replica and 3 replicas were measured for each condition. The list and  
5 complete data of proteins used for each boxplot and the heatmap are reported in Table  
6 S3.

7

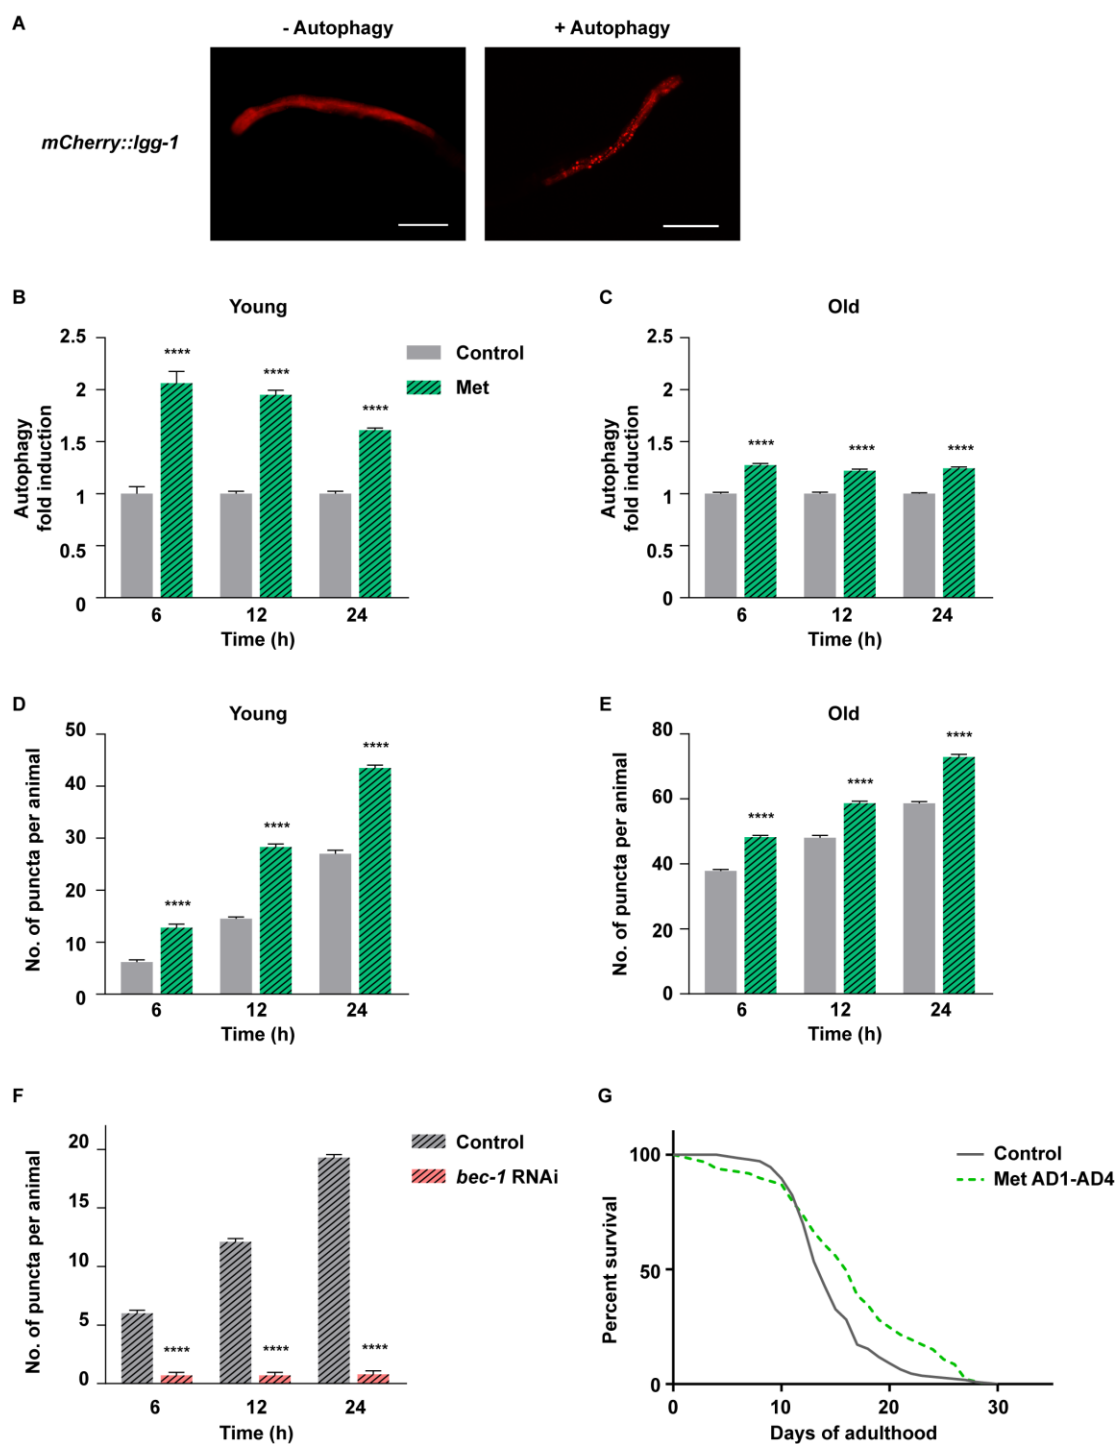

1  
2  
3  
4  
5  
6  
7

**Figure S10. Induction of autophagy by metformin is impaired in late life.** (A) Representative images of baseline diffused mCherry::LGG-1 expression (**left panel**) and autophagy puncta (**right panel**) are shown, scale bar is 100µm. Young (adulthood day 1, AD1) and old (AD10) transgenic animals were treated with 50mM metformin (Met), the number of puncta per animal was quantified, **B** and **C** show autophagy fold

1 induction relative to time point matched untreated control in each case; **D** and **E** show  
2 absolute numbers of puncta per animal used for the calculation of values shown in B-C.  
3 The baseline elevation of autophagy over time is likely due to fresh plate transfer in all  
4 cases. (**F**) Transgenic animals were exposed to *bec-1* or control RNAi from the L4 larval  
5 stage; number of puncta was quantified over time. (**G**) Wild type nematodes were  
6 treated with 50mM metformin from day 1 (AD1) till day 4 (AD4) of adulthood, survival  
7 was scored daily. For **G**  $n \geq 100$ , significance was measured by log-rank test, the exact  $n$   
8 numbers and statistical values are presented in Table S1. For **B-F**  $n=10$ , mean and  
9 SEM are presented, two-tailed unpaired t-test was used for the statistical analysis, all  
10 statistical values are presented in Table S2; \*\*\*\*  $p < 0,0001$ .

1  
2  
3  
4  
5  
6  
7  
8  
9  
10  
11



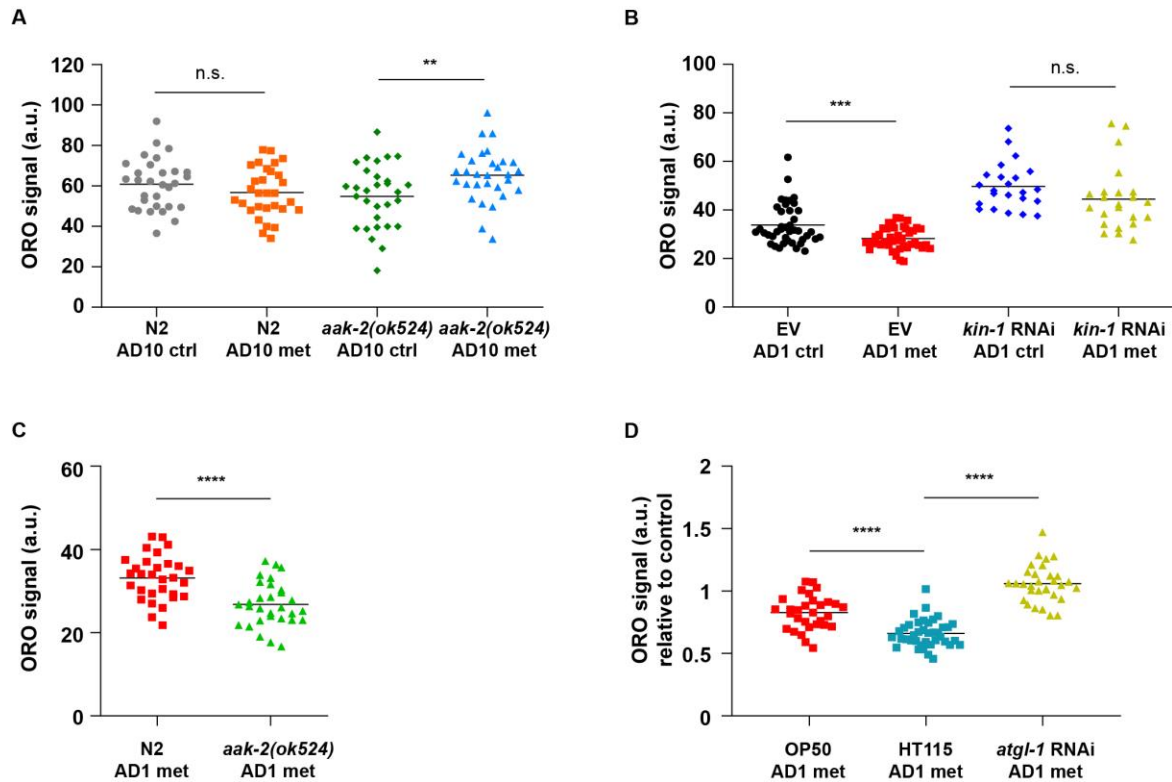

**Figure S11. The age-specific effects of metformin on lipid reserves are regulated by PKA and AMPK pathways.**

(A) Wild type (N2, Bristol strain) and AMPK deficient *aak-2(ok524)* animals were treated with 50mM metformin on adulthood day 10 (AD10), whole body Oil Red O lipid staining was performed after 24h of treatment. (B) Pre-adult (larval stage 4) wild type animals were exposed to empty vector RNAi (EV) or *kin-1* RNAi for 12h prior to treatment with 50mM metformin. The limited RNAi exposure was necessary because early age *kin-1* RNAi treatment had a strong effect on nematode development. Oil red O whole body lipid staining was performed after 24h of metformin exposure. (C) Wild type and AMPK deficient animals were treated with 50mM metformin on adulthood day 1 (AD1) and whole body Oil Red O lipid staining was performed after 24h of treatment. The absolute difference between metformin exposed mutant and control animals is presented (complementary to Fig 6E), demonstrating a stronger metformin-triggered decline of lipid content in AMPK deficient animals. (D) Young wild type animals were treated with 50mM metformin in the presence of OP50 *E. coli*, HT115 *E. coli* containing the empty vector and *atgl-1* RNAi provided in HT115 bacteria; whole body Oil Red O lipid staining was performed after 24h of treatment, presented values were normalized to respective metformin free control in each case. Oil Red O mean grey values were taken as arbitrary units (a.u.) in all cases. For A and C n=30, for B n≥23 and for D n≥30; in all cases mean value is presented, two-tailed unpaired t-test was used for the statistical analysis, all statistical values are presented in Table S2; \*\* p<0,01; \*\*\* p<0,001; \*\*\*\* p<0,0001.

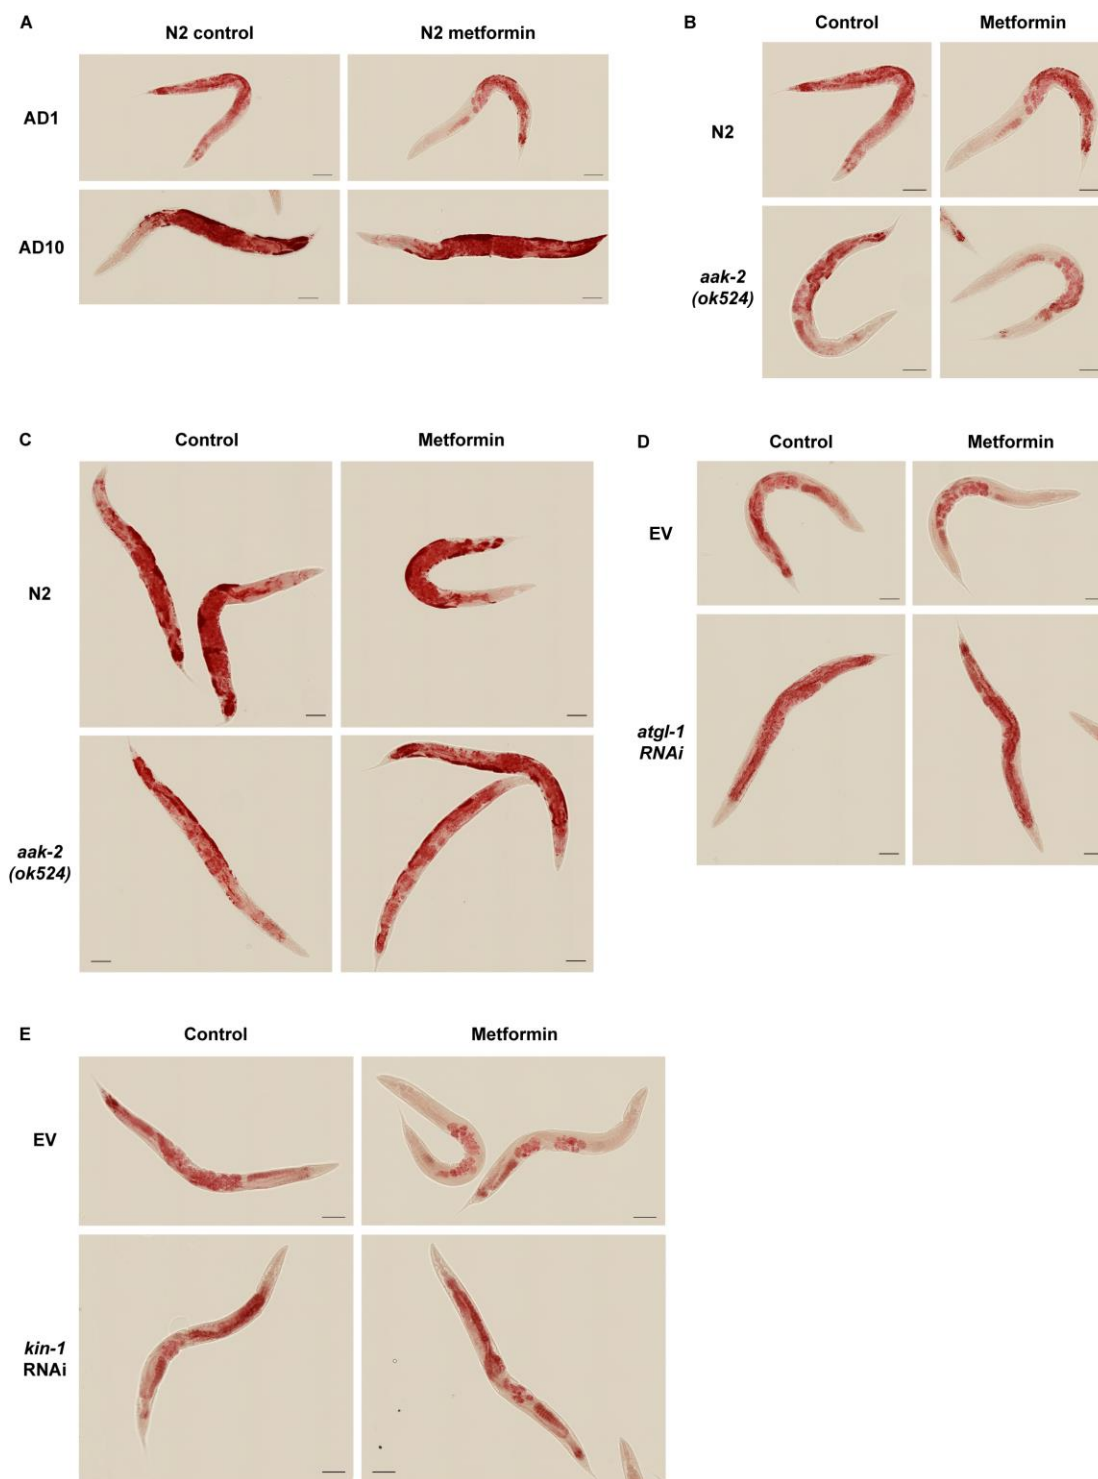

1  
2  
3  
4  
5  
6  
7

**Figure S12. Lipid levels were assessed by whole body Oil Red O staining in nematodes.** Representative images corresponding to Figures 6A (young and old wild type animals) (A), 6E (young animals) (B), S11A (old animals) (C), 6F (young animals) (D) and S11B (young animals) (E) are shown. For (A-E) scale bar is 100µm. For A-C n=30, for D n≥31 and for E n≥23.

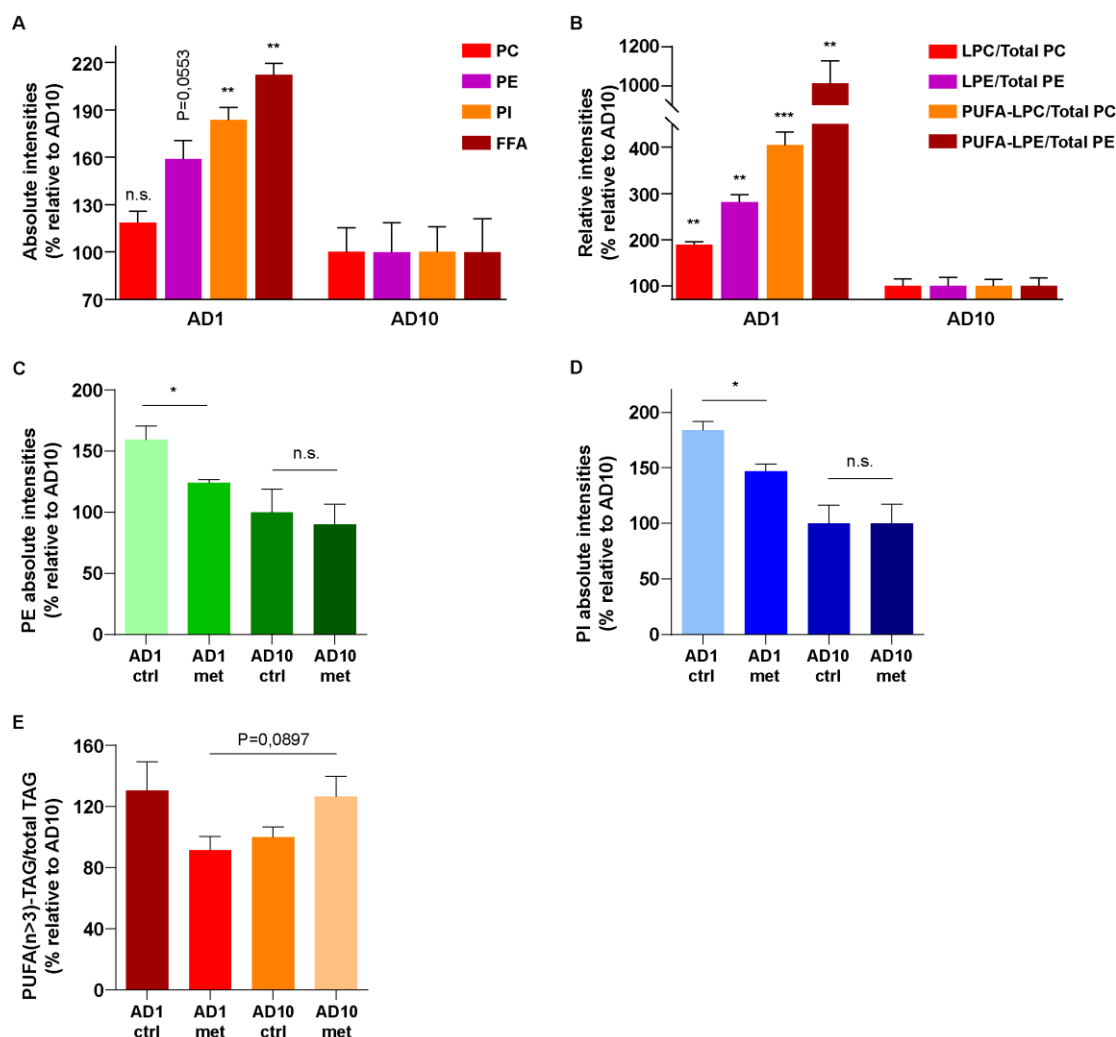

1  
2  
3 **Figure S13. The dietary restriction mimetic lipid turnover response to metformin**  
4 **is blunted in late life.** Wild type animals were treated with 50mM metformin for 24h on  
5 AD1 and AD10; lipids were isolated and analyzed by UPLC-MS/MS. Absolute intensities  
6 for phosphatidylethanolamines (PEs) (C) and phosphatidylinositols (PIs) (D) are shown  
7 for treated and untreated animals, and absolute intensities of PEs, PIs, free fatty acids  
8 (FFAs) and phosphatidylcholines (PC) are shown for untreated young and old animals  
9 (A). (B) Relative intensities of lyso-phosphatidylcholines (LPCs) and lyso-  
10 phosphatidylethanolamines (LPEs) as well as of polyunsaturated fatty acid (PUFA)  
11 containing LPCs and LPEs are shown for untreated young and old animals. (E) Relative  
12 intensities of triglycerides with PUFAs containing more than 3 double bonds (PUFA n>3  
13 TAGs) are shown for young and old treated and untreated animals. All values are  
14 normalized to the AD10 untreated control. Definitions of absolute and relative intensities  
15 are provided in the Methods section. For A-E 700 animals were analyzed in 3 replicas  
16 for each condition, all individual lipid values are presented in Table S4, mean and SEM

1 are depicted, two-tailed unpaired t-test was used for the statistical analysis, all statistical  
2 values are presented in Table S2; \*  $p < 0,05$ ; \*\*  $p < 0,01$ ; \*\*\*  $p < 0,001$ .

3

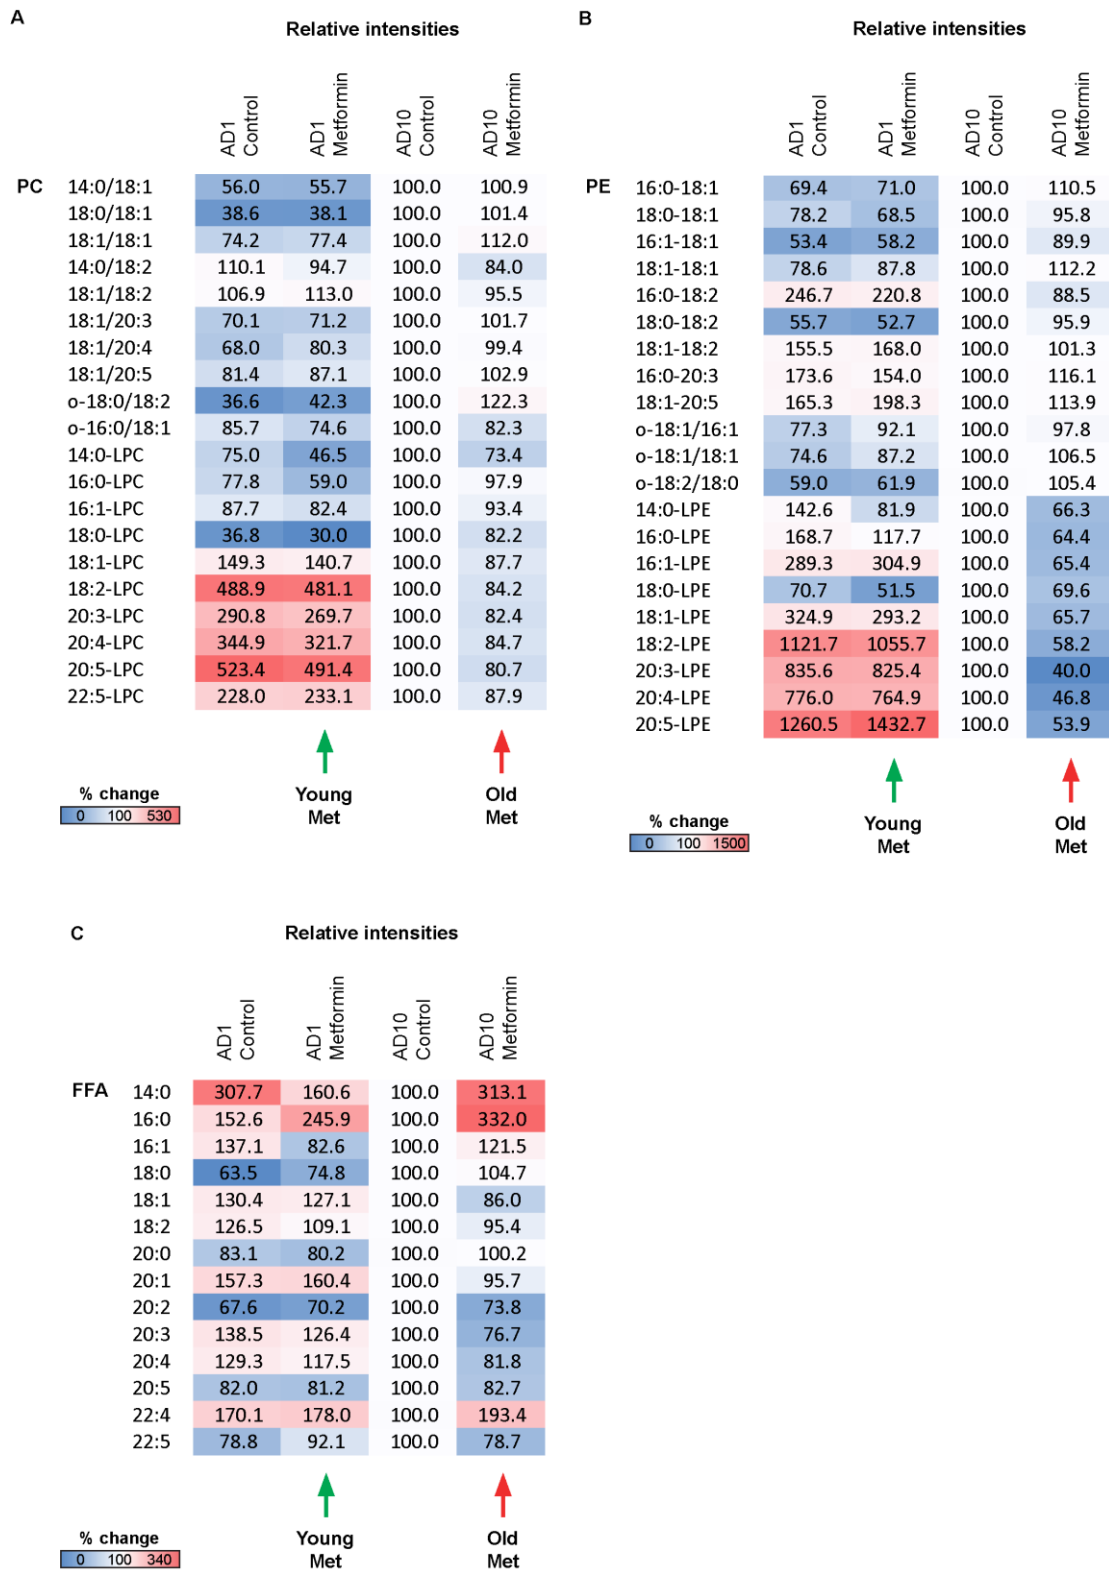

**Figure S14. Metformin treatment triggers age specific patterns of lipid utilization.** Wild type animals were treated with 50mM metformin for 24h on AD1 and AD10; lipids

1 were isolated and analyzed by UPLC-MS/MS. Mean relative intensities of distinct  
2 phosphatidylcholines (PC) (**A**), phosphatidylethanolamines (PEs) (**B**), and free fatty  
3 acids (**C**) are presented. All values are normalized to the AD10 untreated control. For **A-**  
4 **C** 700 animals were analyzed in 3 replicas for each condition, all individual lipid values  
5 are presented in Table S4.  
6

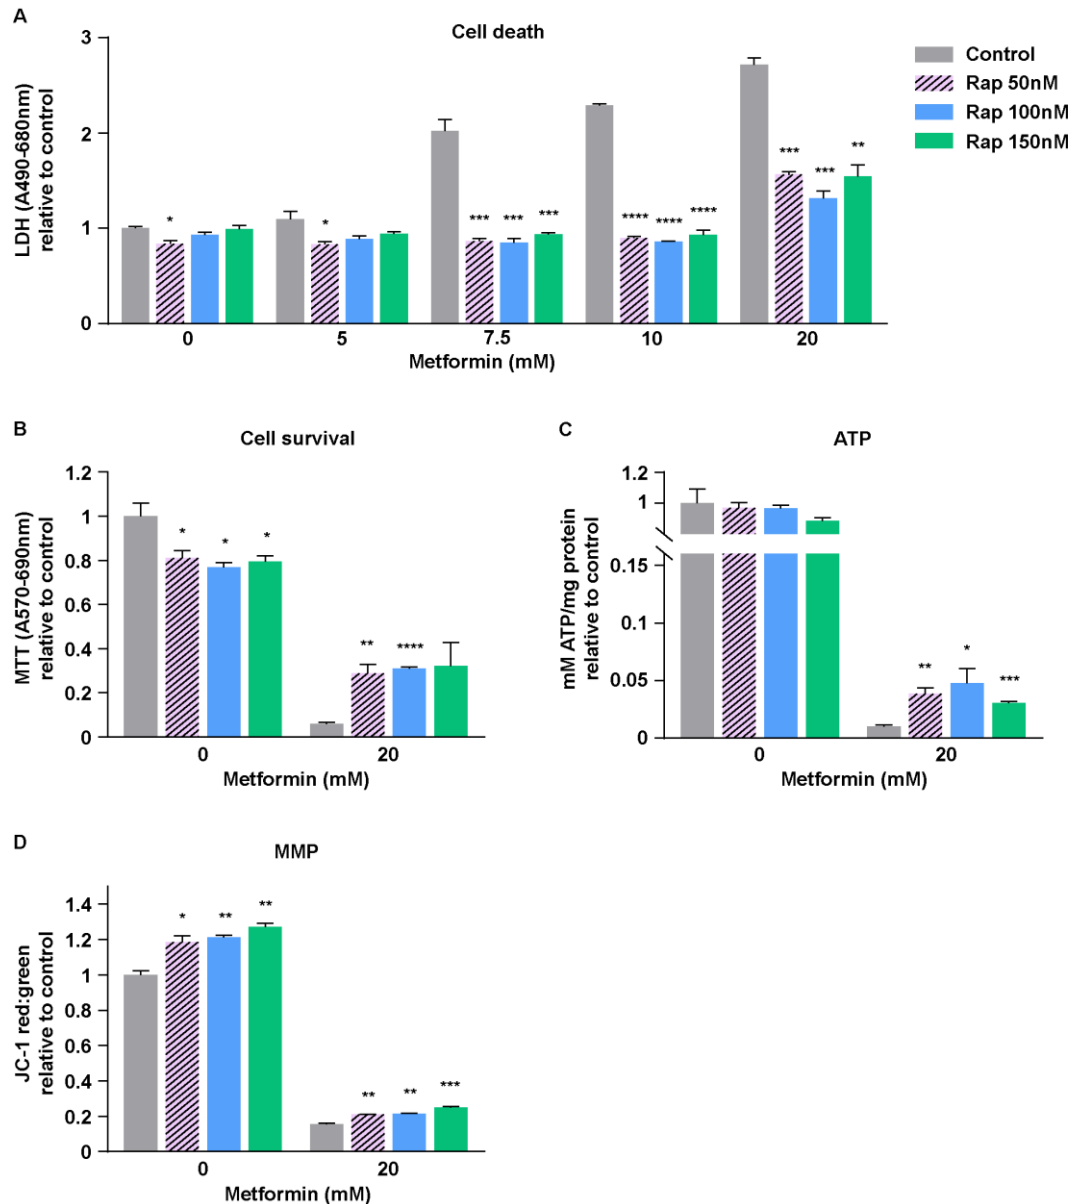

**Figure S15. Rapamycin co-treatment alleviates metformin toxicity in human primary cells.** Pre-senescent (PD44) primary human skin fibroblasts were treated with indicated doses of metformin in presence or absence of indicated concentrations of rapamycin (Rap) for 24 (A, B) and 20 (C, D) hours. Cell death (A, LDH assay), cell survival (B, MTT assay), ATP content (C) and mitochondrial membrane potential (D, JC-1 staining) were measured; the data are complementary to Fig. 7A-C; values are relative to the respective untreated control (no rapamycin, no metformin) for each assay. n=3, mean and SEM are presented, two-tailed unpaired t-test was used for the statistical analysis, statistical values are shown in Table S2; \* p<0,05; \*\* p<0,01; \*\*\* p<0,001; \*\*\*\* p<0,0001.

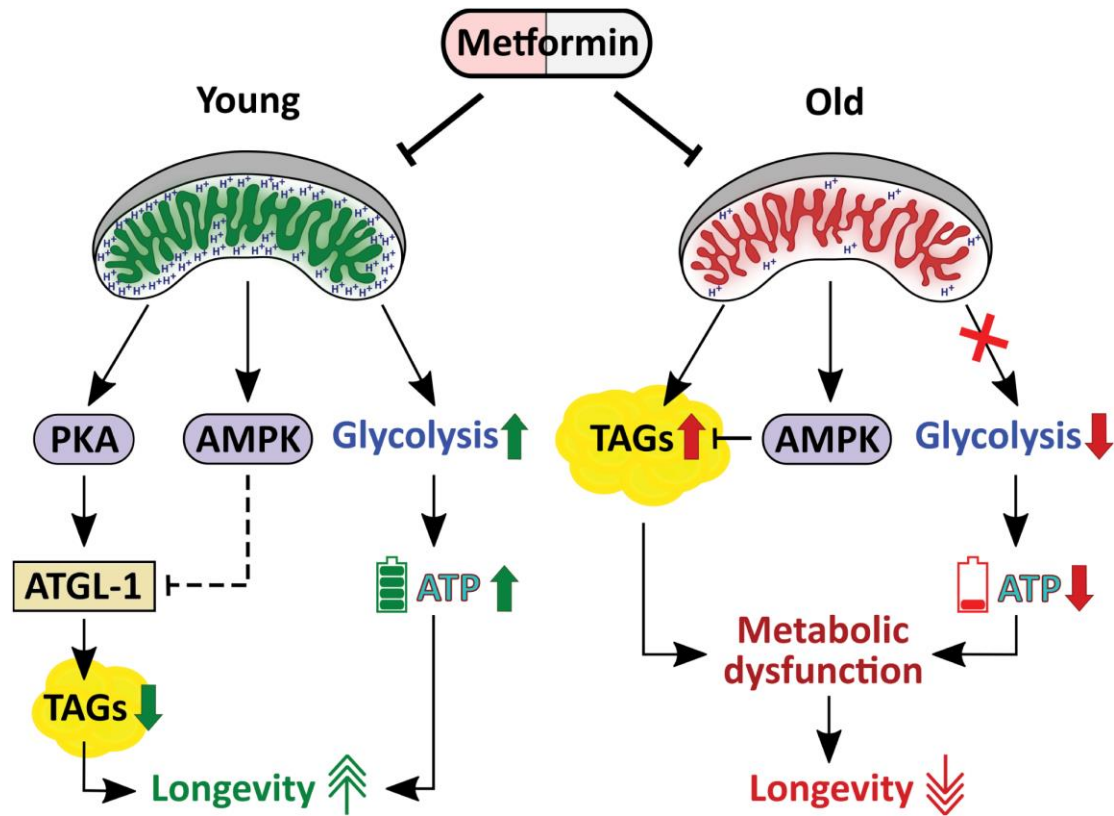

1  
2  
3  
4  
5  
6  
7  
8  
9  
10  
11

**Figure S16. Metformin exerts age-specific effects on energy metabolism and instigates a severe energetics failure in late life.** While early life metformin treatment triggers metabolic adaptations, such as elevated glycolysis and the DR-like utilization of lipids, which support the longevity benefits of this drug, late life metformin exposure acts in concert with aging-associated metabolic distortions to trigger a severe metabolic failure culminating in ATP exhaustion incompatible with cell viability. Importantly, the early life DR effect of metformin is executed by the PKA pathway while AMPK likely prevents the untimely lipid expenditure by this pathway to ensure long-term longevity benefits of metformin.



1 **Table S1. Statistics for lifespan experiments (log rank test).**

|                     | Condition                       | Median survival | Death events | Censored objects | P value | P value sum |
|---------------------|---------------------------------|-----------------|--------------|------------------|---------|-------------|
| <b>Fig 1A</b>       | N2                              | 14              | 137          | 3                | -       | -           |
|                     | N2 + Met 10mM AD1               | 15              | 121          | 19               | 0.0002  | ***         |
|                     | N2 + Met 25mM AD1               | 18              | 129          | 11               | <0.0001 | ****        |
|                     | N2 + Met 50mM AD1               | 19              | 127          | 13               | <0.0001 | ****        |
| <b>Fig 1B</b>       | N2                              | 14              | 137          | 3                | -       | -           |
|                     | N2 + Met 10mM AD10              | 11              | 125          | 15               | <0.0001 | ****        |
|                     | N2 + Met 25mM AD10              | 11              | 130          | 10               | <0.0001 | ****        |
|                     | N2 + Met 50mM AD10              | 11              | 134          | 6                | <0.0001 | ****        |
| <b>Fig 1C</b>       | HT115                           | 21              | 125          | 15               | -       | -           |
|                     | HT115 + Met AD10                | 16              | 140          | 3                | <0.0001 | ****        |
|                     | HT115 UV-killed                 | 13              | 137          | 4                | -       | -           |
|                     | HT115 UV-killed + Met AD10      | 11              | 138          | 3                | <0.0001 | ****        |
| <b>Fig 1D</b>       | OP50                            | 16              | 125          | 15               | -       | -           |
|                     | OP50 + Met AD10                 | 12              | 135          | 5                | 0.3222  | n.s.        |
|                     | OP50 UV-killed                  | 15              | 140          | 10               | -       | -           |
|                     | OP50 UV-killed + Met AD10       | 11              | 137          | 3                | <0.0001 | ****        |
| <b>Fig 1E left</b>  | N2                              | 17              | 121          | 23               | -       | -           |
|                     | N2 + Met AD1                    | 18              | 89           | 37               | 0.0002  | ***         |
|                     | N2 + Met AD10                   | 12              | 104          | 18               | <0.0001 | ****        |
| <b>Fig 1E right</b> | <i>aak-2(ok524)</i>             | 13              | 100          | 32               | -       | -           |
|                     | <i>aak-2(ok524)</i> + Met AD1   | 14              | 110          | 26               | 0.6585  | n.s.        |
|                     | <i>aak-2(ok524)</i> + Met AD10  | 11              | 121          | 20               | <0.0001 | ****        |
| <b>Fig 2A</b>       | N2                              | 16              | 118          | 7                | -       | -           |
|                     | N2 + Met AD1                    | 21              | 118          | 2                | <0.0001 | ****        |
|                     | <i>atfs-1(gk3094)</i>           | 9               | 108          | 25               | -       | -           |
|                     | <i>atfs-1(gk3094)</i> + Met AD1 | 6               | 104          | 16               | <0.0001 | ****        |
| <b>Fig 2B</b>       | N2                              | 15              | 131          | 9                | -       | -           |
|                     | N2 + Met AD1                    | 17              | 139          | 1                | <0.0001 | ****        |
|                     | <i>skn-1(zj15)</i>              | 11              | 140          | 0                | -       | -           |
|                     | <i>skn-1(zj15)</i> + Met AD1    | 9               | 140          | 0                | 0.0026  | **          |
| <b>Fig 2C</b>       | N2                              | 13              | 111          | 40               | -       | -           |
|                     | N2 + Met AD1                    | 17              | 110          | 35               | 0.0003  | ***         |
|                     | <i>isp-1(qm150)</i>             | 15              | 141          | 19               | -       | -           |
|                     | <i>isp-1(qm150)</i> + Met AD1   | 10              | 131          | 37               | <0.0001 | ****        |
| <b>Fig 2D</b>       | DMSO                            | 16              | 119          | 21               | -       | -           |
|                     | DMSO + Met 50mM AD1             | 20              | 88           | 49               | 0.0001  | ***         |
|                     | FCCP 25mM                       | 12              | 32           | 110              | -       | -           |
|                     | FCCP 25mM + Met 50mM AD1        | 8               | 40           | 91               | 0.0006  | ***         |
| <b>Fig 4A</b>       | N2                              | 15              | 131          | 19               | -       | -           |
|                     | N2 + Met AD10                   | 11              | 134          | 16               | <0.0001 | ****        |
|                     | <i>daf-2(e1370)</i>             | 31              | 142          | 8                | -       | -           |
|                     | <i>daf-2(e1370)</i> + Met AD10  | 31              | 137          | 13               | 0.4935  | n.s.        |
| <b>Fig 4B</b>       | N2                              | 17              | 153          | 8                | -       | -           |
|                     | N2 + Met AD10                   | 14              | 150          | 10               | 0.0219  | *           |
|                     | <i>glp-1(e2141)</i>             | 31              | 148          | 12               | -       | -           |
|                     | <i>glp-1(e2141)</i> + Met AD10  | 22              | 158          | 4                | <0.0001 | ****        |

|                      | Condition                                   | Median survival | Death events | Cen.s.ored objects | P value | P value sum |
|----------------------|---------------------------------------------|-----------------|--------------|--------------------|---------|-------------|
| <b>Fig 7D</b>        | N2                                          | 14.5            | 150          | 0                  | -       | -           |
|                      | N2 + Met 50mM AD1                           | 19              | 147          | 3                  | <0.0001 | ****        |
|                      | N2 + Met 50mM AD10                          | 11              | 150          | 0                  | <0.0001 | ****        |
|                      | N2 + Rap 100µM AD8                          | 15              | 146          | 4                  | -       | -           |
|                      | N2 + Rap 100µM AD8 + Met 50mM AD10          | 11              | 150          | 0                  | 0.2262  | n.s.        |
| <b>Fig S1A</b>       | N2                                          | 13              | 127          | 13                 | -       | -           |
|                      | N2 + Met 10mM AD4                           | 13              | 138          | 4                  | 0.0442  | *           |
|                      | N2 + Met 25mM AD4                           | 13              | 133          | 6                  | 0.0147  | *           |
|                      | N2 + Met 50mM AD4                           | 17              | 137          | 5                  | <0.0001 | ****        |
| <b>Fig S1B</b>       | N2                                          | 13              | 127          | 13                 | -       | -           |
|                      | N2 + Met 10mM AD8                           | 13              | 132          | 9                  | 0.0828  | n.s.        |
|                      | N2 + Met 25mM AD8                           | 11              | 142          | 1                  | 0.7546  | n.s.        |
|                      | N2 + Met 50mM AD8                           | 10              | 132          | 8                  | 0.3371  | n.s.        |
| <b>Fig S2A left</b>  | N2                                          | 15              | 131          | 9                  | -       | -           |
|                      | N2 + Met AD1                                | 17              | 139          | 1                  | <0.0001 | ****        |
|                      | N2 + Met AD10                               | 11              | 132          | 8                  | <0.0001 | ****        |
| <b>Fig S2A right</b> | <i>ubl-5(ok3389)</i>                        | 9               | 132          | 8                  | -       | -           |
|                      | <i>ubl-5(ok3389)</i> + Met AD1              | 8               | 106          | 34                 | 0.9668  | n.s.        |
|                      | <i>ubl-5(ok3389)</i> + Met AD10             | 9               | 123          | 17                 | 0.9292  | n.s.        |
| <b>Fig S7A</b>       | N2                                          | 15              | 131          | 19                 | -       | -           |
|                      | N2 + Met AD10                               | 11              | 134          | 16                 | <0.0001 | ****        |
|                      | <i>daf-2(e1370)</i>                         | 31              | 142          | 8                  | -       | -           |
|                      | <i>daf-2(e1370)</i> + Met AD21              | 25              | 137          | 13                 | <0.0001 | ****        |
| <b>Fig S7B</b>       | N2                                          | 16              | 157          | 14                 | -       | -           |
|                      | N2 + Met AD10                               | 14              | 153          | 13                 | 0.0024  | **          |
|                      | <i>daf-2(e1370);daf-16(mu86)</i>            | 15              | 131          | 33                 | -       | -           |
|                      | <i>daf-2(e1370);daf-16(mu86)</i> + Met AD10 | 11              | 127          | 30                 | <0.0001 | ****        |
| <b>Fig S10G</b>      | N2                                          | 14              | 112          | 35                 | -       | -           |
|                      | N2 + Met AD1-AD4                            | 16              | 112          | 36                 | 0.002   | **          |

1 **Table S2. Statistics for all data analyzed by t-test.**

|               |                 | Mean ± SEM, n           | Mean ± SEM, n           |                |                    |
|---------------|-----------------|-------------------------|-------------------------|----------------|--------------------|
| <b>Fig 2E</b> | <b>Met (mM)</b> | <b>DMSO</b>             | <b>FCCP (2.5µM)</b>     | <b>P value</b> | <b>P value sum</b> |
|               | 0               | 1 ± 0.01928, n=3        | 1 ± 0.04559, n=3        | -              | -                  |
|               | 1               | 1.009 ± 0.01554, n=3    | 0.7538 ± 0.0167, n=3    | 0.0004         | ***                |
|               | 5               | 0.6975 ± 0.02913, n=3   | 0.04597 ± 0.003619, n=3 | <0.0001        | ****               |
|               | 10              | 0.5153 ± 0.06724, n=3   | 0.06811 ± 0.001803, n=3 | 0.0027         | **                 |
| <b>Fig 3A</b> | <b>Met (mM)</b> | <b>Young</b>            | <b>Old</b>              | <b>P value</b> | <b>P value sum</b> |
|               | 0               | 1 ± 0.03216, n=3        | 1 ± 0.02902, n=3        | -              | -                  |
|               | 7.5             | 0.7495 ± 0.01389, n=3   | 0.1439 ± 0.007043, n=3  | <0.0001        | ****               |
|               | 10              | 0.6478 ± 0.0108, n=3    | 0.1575 ± 0.007882, n=3  | <0.0001        | ****               |
|               | 20              | 0.3123 ± 0.008869, n=3  | 0.03532 ± 0.004905, n=3 | <0.0001        | ****               |
| <b>Fig 3B</b> | <b>Met (mM)</b> | <b>Young</b>            | <b>Old</b>              | <b>P value</b> | <b>P value sum</b> |
|               | 0               | 1 ± 0.07751, n=3        | 1 ± 0.03572, n=3        | -              | -                  |
|               | 7.5             | 0.8663 ± 0.03863, n=3   | 3.016 ± 0.09238, n=3    | <0.0001        | ****               |
|               | 10              | 1.296 ± 0.1005, n=3     | 3.482 ± 0.1081, n=3     | 0.0001         | ***                |
|               | 20              | 1.836 ± 0.03644, n=3    | 3.918 ± 0.02459, n=3    | <0.0001        | ****               |
| <b>Fig 3C</b> | <b>Met (mM)</b> | <b>Young</b>            | <b>Old</b>              | <b>P value</b> | <b>P value sum</b> |
|               | 0               | 39.66 ± 4.046, n=3      | 12.9 ± 0.6323, n=3      | 0.0028         | **                 |
|               | <b>Age</b>      | <b>Control</b>          | <b>Met (2mM)</b>        | <b>P value</b> | <b>P value sum</b> |
|               | Young           | 39.66 ± 4.046, n=3      | 3.603 ± 2.719, n=3      | 0.0018         | **                 |
|               | Old             | 12.9 ± 0.6323, n=3      | 2.037 ± 0.1049, n=3     | <0.0001        | ****               |
| <b>Fig 3D</b> | <b>Met (mM)</b> | <b>Young</b>            | <b>Old</b>              | <b>P value</b> | <b>P value sum</b> |
|               | 0               | 61.39 ± 6.597, n=3      | 40.78 ± 2.423, n=3      | 0.0427         | *                  |
|               | <b>Age</b>      | <b>Control</b>          | <b>Met (2mM)</b>        | <b>P value</b> | <b>P value sum</b> |
|               | Young           | 61.39 ± 6.597, n=3      | 72.84 ± 5.119, n=3      | 0.2423         | n.s.               |
|               | Old             | 40.78 ± 2.423, n=3      | 28.9 ± 1.371, n=3       | 0.013          | *                  |
| <b>Fig 3E</b> | <b>Age</b>      | <b>Control</b>          | <b>Met (2mM)</b>        | <b>P value</b> | <b>P value sum</b> |
|               | Young           | 3.283 ± 0.2502, n=3     | 17.14 ± 1.156, n=3      | 0.0003         | ***                |
|               | Old             | 2.55 ± 0.1093, n=3      | 4.892 ± 0.1258, n=3     | 0.0001         | ***                |
| <b>Fig 3F</b> | <b>Met (mM)</b> | <b>Young</b>            | <b>Old</b>              | <b>P value</b> | <b>P value sum</b> |
|               | 0               | 1 ± 0.03818, n=3        | 1 ± 0.002839, n=3       | -              | -                  |
|               | 7.5             | 0.1659 ± 0.006438, n=3  | 0.08412 ± 0.006205, n=3 | 0.0008         | ***                |
|               | 10              | 0.1337 ± 0.01194, n=3   | 0.04221 ± 0.004959, n=3 | 0.0021         | **                 |
|               | 15              | 0.07134 ± 0.005807, n=3 | 0.01024 ± 0.00463, n=3  | 0.0012         | **                 |
| <b>Fig 3G</b> | <b>Met (mM)</b> | <b>Young</b>            | <b>Old</b>              | <b>P value</b> | <b>P value sum</b> |
|               | 0               | 1 ± 0.08711, n=3        | 1 ± 0.01307, n=3        | -              | -                  |
|               | 10              | 1.094 ± 0.02722, n=3    | 0.2878 ± 0.04623, n=3   | 0.0001         | ***                |
|               | 20              | 0.7805 ± 0.01969, n=3   | 0.1267 ± 0.006331, n=3  | <0.0001        | ****               |
|               | 50              | 0.1618 ± 0.01189, n=3   | 0.09396 ± 0.005892, n=3 | 0.0069         | **                 |

2

|        |                       | Mean ± SEM, n                      | Mean ± SEM, n                         |                |                    |
|--------|-----------------------|------------------------------------|---------------------------------------|----------------|--------------------|
| Fig 3H | <b>Age</b>            | <b>Control</b>                     | <b>Met (50mM)</b>                     | <b>P value</b> | <b>P value sum</b> |
|        | Young                 | 0.2114 ± 0.002911, n=3             | 0.2383 ± 0.006518, n=6                | 0.0282         | *                  |
|        | Old                   | 0.09924 ± 0.005356, n=3            | 0.02404 ± 0.006823, n=6               | 0.0002         | ***                |
| Fig 3I | <b>Met (mM)</b>       | <b>Control</b>                     | <b>ATP (0.5mM)</b>                    | <b>P value</b> | <b>P value sum</b> |
|        | 0                     | 1 ± 0.06479, n=3                   | 1.039 ± 0.03647, n=3                  | 0.6245         | n.s.               |
|        | 7.5                   | 0.001964 ± 0.000187, n=3           | 0.313 ± 0.0237, n=3                   | 0.0002         | ***                |
|        | 10                    | 0.001296 ± 0.0001649, n=3          | 0.2475 ± 0.02031, n=3                 | 0.0003         | ***                |
|        | 20                    | 0.002155 ± 7.775e-005, n=3         | 0.1814 ± 0.03631, n=3                 | 0.0078         | **                 |
|        | <b>Met (mM)</b>       | <b>Control</b>                     | <b>ATP (1mM)</b>                      | <b>P value</b> | <b>P value sum</b> |
|        | 0                     | 1 ± 0.06479, n=3                   | 1.111 ± 0.07265, n=3                  | 0.3179         | n.s.               |
|        | 7.5                   | 0.001964 ± 0.000187, n=3           | 0.4433 ± 0.01919, n=3                 | <0.0001        | ****               |
|        | 10                    | 0.001296 ± 0.0001649, n=3          | 0.3588 ± 0.03428, n=3                 | 0.0005         | ***                |
|        | 20                    | 0.002155 ± 7.775e-005, n=3         | 0.2856 ± 0.0129, n=3                  | <0.0001        | ****               |
| Fig 3J | <b>Met (mM)</b>       | <b>Control</b>                     | <b>ATP (0.5mM)</b>                    | <b>P value</b> | <b>P value sum</b> |
|        | 0                     | 1 ± 0.05224, n=3                   | 1.083 ± 0.03507, n=3                  | 0.2600         | n.s.               |
|        | 7.5                   | 0.2434 ± 0.02794, n=3              | 1.136 ± 0.01765, n=3                  | <0.0001        | ****               |
|        | 10                    | 0.2075 ± 0.01508, n=3              | 1.033 ± 0.006746, n=3                 | <0.0001        | ****               |
|        | 20                    | 0.05069 ± 0.005113, n=3            | 0.7031 ± 0.002359, n=3                | <0.0001        | ****               |
|        | <b>Met (mM)</b>       | <b>Control</b>                     | <b>ATP (1mM)</b>                      | <b>P value</b> | <b>P value sum</b> |
|        | 0                     | 1 ± 0.05224, n=3                   | 1.014 ± 0.01534, n=3                  | 0.8145         | n.s.               |
|        | 7.5                   | 0.2434 ± 0.02794, n=3              | 0.9445 ± 0.02285, n=3                 | <0.0001        | ****               |
|        | 10                    | 0.2075 ± 0.01508, n=3              | 0.9728 ± 0.02418, n=3                 | <0.0001        | ****               |
|        | 20                    | 0.05069 ± 0.005113, n=3            | 0.533 ± 0.01381, n=3                  | <0.0001        | ****               |
| Fig 4C | <b>Age</b>            | <b>N2 Control</b>                  | <b>N2 Met (50mM)</b>                  | <b>P value</b> | <b>P value sum</b> |
|        | AD1                   | 0.2114 ± 0.002911, n=3             | 0.2383 ± 0.006518, n=6                | 0.0282         | *                  |
|        | AD10                  | 0.09924 ± 0.005356, n=3            | 0.02404 ± 0.006823, n=6               | 0.0002         | ***                |
|        | <b>Age</b>            | <b><i>daf-2(e1370)</i> Control</b> | <b><i>daf-2(e1370)</i> Met (50mM)</b> | <b>P value</b> | <b>P value sum</b> |
|        | AD1                   | 0.153 ± 0.005777, n=6              | 0.1702 ± 0.003683, n=3                | 0.0922         | n.s.               |
|        | AD10                  | 0.2114 ± 0.009389, n=6             | 0.2009 ± 0.008984, n=3                | 0.5057         | n.s.               |
|        | <b>Age</b>            | <b><i>glp-1(e2141)</i> Control</b> | <b><i>glp-1(e2141)</i> Met (50mM)</b> | <b>P value</b> | <b>P value sum</b> |
|        | AD1                   | 0.2637 ± 0.005843, n=3             | 0.3321 ± 0.003534, n=6                | <0.0001        | ****               |
| AD10   | 0.0639 ± 0.01218, n=6 | 0.005644 ± 0.00102, n=6            | 0.0008                                | ***            |                    |
| Fig 6A | <b>Met (mM)</b>       | <b>AD1</b>                         | <b>AD10</b>                           | <b>P value</b> | <b>P value sum</b> |
|        | 0                     | 40.08 ± 1.292, n=30                | 73.51 ± 3.784, n=30                   | <0.0001        | ****               |
|        | <b>Age</b>            | <b>Control</b>                     | <b>Met (50mM)</b>                     | <b>P value</b> | <b>P value sum</b> |
|        | AD1                   | 40.08 ± 1.292, n=30                | 33.15 ± 0.9861, n=30                  | <0.0001        | ****               |
|        | AD10                  | 73.51 ± 3.784, n=30                | 68.74 ± 3.123, n=30                   | 0.3353         | n.s.               |

|                 |                                  | Mean ± SEM, n             | Mean ± SEM, n          |                   |                    |
|-----------------|----------------------------------|---------------------------|------------------------|-------------------|--------------------|
| <b>Fig 6B</b>   | <b>Met (mM)</b>                  | <b>AD1</b>                | <b>AD10</b>            | <b>P value</b>    | <b>P value sum</b> |
|                 | 0                                | 68.66 ± 6.964, n=3        | 100 ± 26.75, n=3       | 0.3203            | n.s.               |
|                 | 50                               | 53.31 ± 8.963, n=3        | 121 ± 22.68, n=3       | 0.05              | *                  |
| <b>Fig 6C</b>   | <b>Age</b>                       | <b>Control</b>            | <b>Met (50mM)</b>      | <b>P value</b>    | <b>P value sum</b> |
|                 | AD1                              | 212.2 ± 7.167, n=3        | 174.1 ± 11.72, n=3     | 0.05              | *                  |
|                 | AD10                             | 100 ± 20.98, n=3          | 101.7 ± 7.351, n=3     | 0.9413            | n.s.               |
| <b>Fig 6E</b>   | <b>Strain</b>                    | <b>Control</b>            | <b>Met (50mM)</b>      | <b>P value</b>    | <b>P value sum</b> |
|                 | N2                               | 40.08 ± 1.292, n=30       | 33.15 ± 0.9861, n=30   | <0.0001           | ****               |
|                 | <i>aak-2</i><br>( <i>ok524</i> ) | 32.79 ± 1.299, n=30       | 26.81 ± 0.9728, n=30   | 0.0005            | ***                |
| <b>Fig 6F</b>   | <b>RNAi</b>                      | <b>Control</b>            | <b>Met (50mM)</b>      | <b>P value</b>    | <b>P value sum</b> |
|                 | EV                               | 45.37 ± 1.186, n=39       | 29.95 ± 0.7875, n=39   | <0.0001           | ****               |
|                 | <i>atgl-1</i>                    | 58.58 ± 1.695, n=31       | 62.07 ± 1.569, n=31    | 0.1359            | n.s.               |
| <b>Fig 7A</b>   | <b>Met (mM)</b>                  | <b>Control</b>            | <b>Rap (50nM)</b>      | <b>P value</b>    | <b>P value sum</b> |
|                 | 0                                | 1 ± 0.05884, n=3          | 0.8101 ± 0.03397, n=3  | 0.049             | *                  |
|                 | 5                                | 0.1536 ± 0.01521, n=2     | 0.6571 ± 0.02061, n=3  | 0.0004            | ***                |
|                 | 7.5                              | 0.1499 ± 0.008537, n=3    | 0.6239 ± 0.003473, n=3 | <0.0001           | ****               |
|                 | 10                               | 0.1415 ± 0.01161, n=3     | 0.6003 ± 0.01701, n=3  | <0.0001           | ****               |
|                 | <b>Met (mM)</b>                  | <b>Control</b>            | <b>Rap (100nM)</b>     | <b>P value</b>    | <b>P value sum</b> |
|                 | 0                                | 1 ± 0.05884, n=3          | 0.7697 ± 0.02058, n=3  | 0.021             | *                  |
|                 | 5                                | 0.1536 ± 0.01521, n=2     | 0.6149 ± 0.00197, n=3  | <0.0001           | ****               |
|                 | 7.5                              | 0.1499 ± 0.008537, n=3    | 0.6466 ± 0.01463, n=3  | <0.0001           | ****               |
|                 | 10                               | 0.1415 ± 0.01161, n=3     | 0.6744 ± 0.04838, n=3  | 0.0004            | ***                |
|                 | <b>Met (mM)</b>                  | <b>Control</b>            | <b>Rap (150nM)</b>     | <b>P value</b>    | <b>P value sum</b> |
|                 | 0                                | 1 ± 0.05884, n=3          | 0.7933 ± 0.02631, n=3  | 0.0327            | *                  |
|                 | 5                                | 0.1536 ± 0.01521, n=2     | 0.5601 ± 0.01744, n=3  | 0.0005            | ***                |
|                 | 7.5                              | 0.1499 ± 0.008537, n=3    | 0.6293 ± 0.01798, n=3  | <0.0001           | ****               |
|                 | 10                               | 0.1415 ± 0.01161, n=3     | 0.5859 ± 0.03221, n=3  | 0.0002            | ***                |
|                 | <b>Fig 7B</b>                    | <b>Met (mM)</b>           | <b>Control</b>         | <b>Rap (50nM)</b> | <b>P value</b>     |
| 0               |                                  | 1 ± 0.09015, n=3          | 0.9685 ± 0.03405, n=3  | 0.7603            | n.s.               |
| 5               |                                  | 0.03059 ± 0.0068, n=3     | 0.1302 ± 0.01223, n=3  | 0.0021            | **                 |
| 7.5             |                                  | 0.007937 ± 0.0009625, n=3 | 0.07088 ± 0.00288, n=3 | <0.0001           | ****               |
| 10              |                                  | 0.0052 ± 0.0004337, n=3   | 0.07577 ± 0.00976, n=3 | 0.0019            | **                 |
| <b>Met (mM)</b> |                                  | <b>Control</b>            | <b>Rap (100nM)</b>     | <b>P value</b>    | <b>P value sum</b> |
| 0               |                                  | 1 ± 0.09015, n=3          | 0.9646 ± 0.02229, n=3  | 0.7224            | n.s.               |
| 5               |                                  | 0.03059 ± 0.0068, n=3     | 0.1415 ± 0.003949, n=3 | 0.0001            | ***                |
| 7.5             |                                  | 0.007937 ± 0.0009625, n=3 | 0.08858 ± 0.01104, n=3 | 0.0019            | **                 |
| 10              | 0.0052 ± 0.0004337, n=3          | 0.08531 ± 0.001427, n=3   | <0.0001                | ****              |                    |

|                       |                       |                           |                         |                  |                    |
|-----------------------|-----------------------|---------------------------|-------------------------|------------------|--------------------|
|                       |                       | <b>Mean ± SEM, n</b>      | <b>Mean ± SEM, n</b>    |                  |                    |
| <b>Fig 7B (cont.)</b> | <b>Met (mM)</b>       | <b>Control</b>            | <b>Rap (150nM)</b>      | <b>P value</b>   | <b>P value sum</b> |
|                       | 0                     | 1 ± 0.09015, n=3          | 0.8859 ± 0.0194, n=3    | 0.2836           | n.s.               |
|                       | 5                     | 0.03059 ± 0.0068, n=3     | 0.1287 ± 0.009468, n=3  | 0.0011           | **                 |
|                       | 7.5                   | 0.007937 ± 0.0009625, n=3 | 0.08952 ± 0.007791, n=3 | 0.0005           | ***                |
|                       | 10                    | 0.0052 ± 0.0004337, n=3   | 0.0821 ± 0.01688, n=3   | 0.0104           | *                  |
| <b>Fig 7C</b>         | <b>Met (mM)</b>       | <b>Control</b>            | <b>Rap (50nM)</b>       | <b>P value</b>   | <b>P value sum</b> |
|                       | 0                     | 1 ± 0.02445, n=3          | 1.187 ± 0.03374, n=3    | 0.0109           | *                  |
|                       | 5                     | 0.7426 ± 0.2458, n=2      | 1.261 ± 0.01567, n=3    | 0.0671           | n.s.               |
|                       | 7.5                   | 0.3904 ± 0.06532, n=3     | 1.256 ± 0.02154, n=3    | 0.0002           | ***                |
|                       | 10                    | 0.2796 ± 0.004469, n=3    | 1.037 ± 0.07701, n=3    | 0.0006           | ***                |
|                       | <b>Met (mM)</b>       | <b>Control</b>            | <b>Rap (100nM)</b>      | <b>P value</b>   | <b>P value sum</b> |
|                       | 0                     | 1 ± 0.02445, n=3          | 1.213 ± 0.01183, n=3    | 0.0014           | **                 |
|                       | 5                     | 0.7426 ± 0.2458, n=2      | 1.224 ± 0.01917, n=3    | 0.08             | n.s.               |
|                       | 7.5                   | 0.3904 ± 0.06532, n=3     | 1.254 ± 0.03499, n=3    | 0.0003           | ***                |
|                       | 10                    | 0.2796 ± 0.004469, n=3    | 1.081 ± 0.004239, n=3   | <0.0001          | ****               |
|                       | <b>Met (mM)</b>       | <b>Control</b>            | <b>Rap (150nM)</b>      | <b>P value</b>   | <b>P value sum</b> |
|                       | 0                     | 1 ± 0.02445, n=3          | 1.271 ± 0.01996, n=3    | 0.001            | **                 |
|                       | 5                     | 0.7426 ± 0.2458, n=2      | 1.239 ± 0.02619, n=3    | 0.0761           | n.s.               |
|                       | 7.5                   | 0.3904 ± 0.06532, n=3     | 1.293 ± 0.05149, n=3    | 0.0004           | ***                |
|                       | 10                    | 0.2796 ± 0.004469, n=3    | 1.144 ± 0.02261, n=3    | <0.0001          | ****               |
|                       | <b>Fig S2B</b>        | <b>FCCP (µM)</b>          | <b>Control</b>          | <b>Met (1mM)</b> | <b>P value</b>     |
| 0                     |                       | 1 ± 0.0175, n=3           | 1.039 ± 0.05895, n=3    | 0.5586           | n.s.               |
| 2.5                   |                       | 1.077 ± 0.007498, n=3     | 0.9959 ± 0.07316, n=3   | 0.333            | n.s.               |
| 5                     |                       | 0.3677 ± 0.03445, n=3     | 0.3278 ± 0.01216, n=3   | 0.3362           | n.s.               |
| <b>FCCP (µM)</b>      |                       | <b>Control</b>            | <b>Met (5mM)</b>        | <b>P value</b>   | <b>P value sum</b> |
| 0                     |                       | 1 ± 0.0175, n=3           | 0.3779 ± 0.02111, n=3   | <0.0001          | ****               |
| 2.5                   |                       | 1.077 ± 0.007498, n=3     | 0.3117 ± 0.002758, n=3  | <0.0001          | ****               |
| 5                     |                       | 0.3677 ± 0.03445, n=3     | 0.3193 ± 0.003502, n=3  | 0.2342           | n.s.               |
| <b>FCCP (µM)</b>      |                       | <b>Control</b>            | <b>Met (10mM)</b>       | <b>P value</b>   | <b>P value sum</b> |
| 0                     |                       | 1 ± 0.0175, n=3           | 0.354 ± 0.02229, n=3    | <0.0001          | ****               |
| 2.5                   |                       | 1.077 ± 0.007498, n=3     | 0.3177 ± 0.005681, n=3  | <0.0001          | ****               |
| 5                     |                       | 0.3677 ± 0.03445, n=3     | 0.3863 ± 0.02957, n=3   | 0.7034           | n.s.               |
| <b>Fig S4A</b>        | <b>Time (min)</b>     | <b>Young Control</b>      | <b>Old Control</b>      | <b>P value</b>   | <b>P value sum</b> |
|                       | 1,3813                | 45,1941 ± 2,4046, n=3     | 18,8840 ± 0,8791, n=3   | 0,0005           | ***                |
|                       | 9,9139                | 43,4339 ± 2,6707, n=3     | 17,8757 ± 0,7617, n=3   | 0,0008           | ***                |
|                       | 18,4451               | 43,6502 ± 2,9946, n=3     | 17,6177 ± 0,8188, n=3   | 0,0011           | **                 |
|                       | <b>Time (min)</b>     | <b>Young Control</b>      | <b>Young Met (2mM)</b>  | <b>P value</b>   | <b>P value sum</b> |
|                       | 52,7848               | 53,5973 ± 5,4696, n=3     | 58,3179 ± 3,8061, n=3   | 0,5178           | n.s.               |
|                       | 61,3125               | 59,3852 ± 4,8636, n=3     | 70,8732 ± 4,7706, n=3   | 0,167            | n.s.               |
| 69,8366               | 65,3852 ± 4,9323, n=3 | 77,0953 ± 4,4812, n=3     | 0,1537                  | n.s.             |                    |

|                        |                          | Mean ± SEM, n            | Mean ± SEM, n          |                |                    |
|------------------------|--------------------------|--------------------------|------------------------|----------------|--------------------|
| <b>Fig S4A (cont.)</b> | <b>Time (min)</b>        | <b>Old Control</b>       | <b>Old Met (2mM)</b>   | <b>P value</b> | <b>P value sum</b> |
|                        | 52,7848                  | 45,3742 ± 1,9937, n=3    | 25,1720 ± 1,5858, n=3  | 0,0014         | **                 |
|                        | 61,3125                  | 44,9785 ± 2,6183, n=3    | 28,8569 ± 1,5600, n=3  | 0,0055         | **                 |
|                        | 69,8366                  | 45,4986 ± 2,6238, n=3    | 31,5116 ± 1,6559, n=3  | 0,0108         | *                  |
| <b>Fig S4C</b>         | <b>Met (mM)</b>          | <b>Young</b>             | <b>Old</b>             | <b>P value</b> | <b>P value sum</b> |
|                        | 0                        | 34.78 ± 3.368, n=3       | 11.56 ± 0.6648, n=3    | 0.0025         | **                 |
|                        | <b>Age</b>               | <b>Control</b>           | <b>Met (2mM)</b>       | <b>P value</b> | <b>P value sum</b> |
|                        | Young                    | 34.78 ± 3.368, n=3       | 5.6 ± 1.893, n=3       | 0.0016         | **                 |
|                        | Old                      | 11.56 ± 0.6648, n=3      | 1.08 ± 0.1193, n=3     | 0.0001         | ***                |
| <b>Fig S5A</b>         | <b>Met (mM)</b>          | <b>Control</b>           | <b>ATP (0.5mM)</b>     | <b>P value</b> | <b>P value sum</b> |
|                        | 0                        | 1 ± 0.1476, n=3          | 0.6293 ± 0.008813, n=3 | 0.0662         | n.s.               |
|                        | 5                        | 0.8243 ± 0.06052, n=3    | 0.4386 ± 0.04517, n=3  | 0.0069         | **                 |
|                        | 7.5                      | 2.239 ± 0.1476, n=3      | 0.5185 ± 0.07227, n=3  | 0.0005         | ***                |
|                        | 10                       | 3.627 ± 0.347, n=3       | 0.588 ± 0.03765, n=3   | 0.0010         | ***                |
|                        | 20                       | 7.418 ± 0.04364, n=3     | 1.629 ± 0.2204, n=3    | <0.0001        | ****               |
|                        | <b>Met (mM)</b>          | <b>Control</b>           | <b>ATP (1mM)</b>       | <b>P value</b> | <b>P value sum</b> |
|                        | 0                        | 1 ± 0.1476, n=3          | 1.293 ± 0.2129, n=3    | 0.3209         | n.s.               |
|                        | 5                        | 0.8243 ± 0.06052, n=3    | 0.8062 ± 0.06257, n=3  | 0.8458         | n.s.               |
|                        | 7.5                      | 2.239 ± 0.1476, n=3      | 0.8029 ± 0.1826, n=3   | 0.0036         | **                 |
|                        | 10                       | 3.627 ± 0.347, n=3       | 0.9559 ± 0.07688, n=3  | 0.0017         | **                 |
|                        | 20                       | 7.418 ± 0.04364, n=3     | 1.807 ± 0.1059, n=3    | <0.0001        | ****               |
| <b>Fig S5B</b>         | <b>Met (mM)</b>          | <b>Control</b>           | <b>ATP (0.5mM)</b>     | <b>P value</b> | <b>P value sum</b> |
|                        | 0                        | 1 ± 0.05224, n=3         | 1.083 ± 0.03507, n=3   | 0.2600         | n.s.               |
|                        | 5                        | 0.8041 ± 0.02062, n=3    | 1.184 ± 0.05484, n=3   | 0.0029         | **                 |
|                        | <b>Met (mM)</b>          | <b>Control</b>           | <b>ATP (1mM)</b>       | <b>P value</b> | <b>P value sum</b> |
|                        | 0                        | 1 ± 0.05224, n=3         | 1.014 ± 0.01534, n=3   | 0.8145         | n.s.               |
| 5                      | 0.8041 ± 0.02062, n=3    | 1.049 ± 0.01003, n=3     | 0.0004                 | ***            |                    |
| <b>Fig S5C</b>         | <b>Met (mM)</b>          | <b>Control</b>           | <b>ATP (0.5mM)</b>     | <b>P value</b> | <b>P value sum</b> |
|                        | 0                        | 1 ± 0.06479, n=3         | 1.039 ± 0.03647, n=3   | 0.6245         | n.s.               |
|                        | 5                        | 0.002212 ± 0.000181, n=3 | 0.3455 ± 0.01279, n=3  | <0.0001        | ****               |
|                        | <b>Met (mM)</b>          | <b>Control</b>           | <b>ATP (1mM)</b>       | <b>P value</b> | <b>P value sum</b> |
|                        | 0                        | 1 ± 0.06479, n=3         | 1.111 ± 0.07265, n=3   | 0.3179         | n.s.               |
| 5                      | 0.002212 ± 0.000181, n=3 | 0.4814 ± 0.01979, n=3    | <0.0001                | ****           |                    |
| <b>Fig S5D</b>         | <b>Met (mM)</b>          | <b>Control</b>           | <b>ATP (0.5mM)</b>     | <b>P value</b> | <b>P value sum</b> |
|                        | 0                        | 1 ± 0.02092, n=3         | 1.013 ± 0.006901, n=3  | 0.588          | n.s.               |
|                        | 5                        | 0.3715 ± 0.004891, n=3   | 1.099 ± 0.007811, n=3  | <0.0001        | ****               |
|                        | 7.5                      | 0.2425 ± 0.01301, n=3    | 1.115 ± 0.001279, n=3  | <0.0001        | ****               |
|                        | 10                       | 0.1631 ± 0.001828, n=3   | 1.133 ± 0.0368, n=3    | <0.0001        | ****               |
|                        | 20                       | 0.1386 ± 0.00302, n=3    | 0.1809 ± 0.00672, n=3  | 0.0045         | **                 |

|                        |                 | Mean ± SEM, n               | Mean ± SEM, n                  |                |                    |
|------------------------|-----------------|-----------------------------|--------------------------------|----------------|--------------------|
| <b>Fig S5D (cont.)</b> | <b>Met (mM)</b> | <b>Control</b>              | <b>ATP (1mM)</b>               | <b>P value</b> | <b>P value sum</b> |
|                        | 0               | 1 ± 0.02092, n=3            | 1.041 ± 0.01864, n=3           | 0.2152         | n.s.               |
|                        | 5               | 0.3715 ± 0.004891, n=3      | 1.043 ± 0.01169, n=3           | <0.0001        | ****               |
|                        | 7.5             | 0.2425 ± 0.01301, n=3       | 1.12 ± 0.0247, n=3             | <0.0001        | ****               |
|                        | 10              | 0.1631 ± 0.001828, n=3      | 1.074 ± 0.02106, n=3           | <0.0001        | ****               |
|                        | 20              | 0.1386 ± 0.00302, n=3       | 0.2841 ± 0.03561, n=3          | 0.0152         | *                  |
| <b>Fig S6A</b>         | <b>Rot (µM)</b> | <b>Control</b>              | <b>ATP (0.5mM)</b>             | <b>P value</b> | <b>P value sum</b> |
|                        | 0               | 1 ± 0.03648, n=3            | 0.8933 ± 0.0156, n=3           | 0.0546         | n.s.               |
|                        | 0.25            | 0.08754 ± 0.003735, n=3     | 0.5736 ± 0.01327, n=3          | <0.0001        | ****               |
|                        | 0.5             | 0.03568 ± 0.0005971, n=3    | 0.5129 ± 0.1059, n=3           | 0.0108         | *                  |
|                        | 1               | 0.03354 ± 0.001033, n=3     | 0.309 ± 0.004552, n=3          | <0.0001        | ****               |
|                        | <b>Rot (µM)</b> | <b>Control</b>              | <b>ATP (1mM)</b>               | <b>P value</b> | <b>P value sum</b> |
|                        | 0               | 1 ± 0.03648, n=3            | 0.9991 ± 0.007009, n=3         | 0.9818         | n.s.               |
|                        | 0.25            | 0.08754 ± 0.003735, n=3     | 0.6074 ± 0.00535, n=3          | <0.0001        | ****               |
|                        | 0.5             | 0.03568 ± 0.0005971, n=3    | 0.5745 ± 0.01922, n=3          | <0.0001        | ****               |
|                        | 1               | 0.03354 ± 0.001033, n=3     | 0.3177 ± 0.01474, n=3          | <0.0001        | ****               |
| <b>Fig S6B</b>         | <b>Rot (µM)</b> | <b>Control</b>              | <b>ATP (0.5mM)</b>             | <b>P value</b> | <b>P value sum</b> |
|                        | 0               | 1 ± 0.04807, n=3            | 0.9791 ± 0.05964, n=3          | 0.7985         | n.s.               |
|                        | 0.25            | 4.168 ± 0.01838, n=3        | 1.05 ± 0.058, n=3              | <0.0001        | ****               |
|                        | 0.5             | 4.483 ± 0.08535, n=3        | 1.007 ± 0.03383, n=3           | <0.0001        | ****               |
|                        | 1               | 4.226 ± 0.03997, n=3        | 1.053 ± 0.05121, n=3           | <0.0001        | ****               |
|                        | <b>Rot (µM)</b> | <b>Control</b>              | <b>ATP (1mM)</b>               | <b>P value</b> | <b>P value sum</b> |
|                        | 0               | 1 ± 0.04807, n=3            | 0.8322 ± 0.08069, n=3          | 0.1485         | n.s.               |
|                        | 0.25            | 4.168 ± 0.01838, n=3        | 0.9028 ± 0.02978, n=3          | <0.0001        | ****               |
|                        | 0.5             | 4.483 ± 0.08535, n=3        | 0.6386 ± 0.1045, n=3           | <0.0001        | ****               |
|                        | 1               | 4.226 ± 0.03997, n=3        | 0.6405 ± 0.03946, n=3          | <0.0001        | ****               |
| <b>Fig S6C</b>         | <b>Rot (µM)</b> | <b>Control</b>              | <b>ATP (0.5mM)</b>             | <b>P value</b> | <b>P value sum</b> |
|                        | 0               | 1 ± 0.009384, n=3           | 0.9875 ± 0.01524, n=3          | 0.522          | n.s.               |
|                        | 0.25            | 0.1042 ± 0.0008257, n=3     | 0.8854 ± 0.03241, n=3          | <0.0001        | ****               |
|                        | 0.5             | 0.1069 ± 0.003512, n=3      | 0.2486 ± 0.06354, n=3          | 0.0899         | n.s.               |
|                        | 1               | 0.1074 ± 0.00153, n=3       | 0.1084 ± 0.003344, n=3         | 0.7906         | n.s.               |
|                        | <b>Rot (µM)</b> | <b>Control</b>              | <b>ATP (1mM)</b>               | <b>P value</b> | <b>P value sum</b> |
|                        | 0               | 1 ± 0.009384, n=3           | 1.035 ± 0.02022, n=3           | 0.1932         | n.s.               |
|                        | 0.25            | 0.1042 ± 0.0008257, n=3     | 0.8671 ± 0.01397, n=3          | <0.0001        | ****               |
|                        | 0.5             | 0.1069 ± 0.003512, n=3      | 0.3455 ± 0.04381, n=3          | 0.0056         | **                 |
|                        | 1               | 0.1074 ± 0.00153, n=3       | 0.1424 ± 0.0222, n=3           | 0.1903         | n.s.               |
| <b>Fig S7C</b>         | <b>Age</b>      | <b>N2 Control</b>           | <b>N2 Met (50mM)</b>           | <b>P value</b> | <b>P value sum</b> |
|                        | AD1             | 0.2114 ± 0.002911, n=3      | 0.2383 ± 0.006518, n=6         | 0.0282         | *                  |
|                        | AD10            | 0.09924 ± 0.005356, n=3     | 0.02404 ± 0.006823, n=6        | 0.0002         | ***                |
|                        | <b>Age</b>      | <b>daf-2(e1370) Control</b> | <b>daf-2(e1370) Met (50mM)</b> | <b>P value</b> | <b>P value sum</b> |
|                        | AD1             | 0.153 ± 0.005777, n=6       | 0.1702 ± 0.003683, n=3         | 0.0922         | n.s.               |
|                        | AD10            | 0.2114 ± 0.009389, n=6      | 0.2009 ± 0.008984, n=3         | 0.5057         | n.s.               |



|                    |                                  | Mean ± SEM, n                               | Mean ± SEM, n                                  |         |                |
|--------------------|----------------------------------|---------------------------------------------|------------------------------------------------|---------|----------------|
| Fig S7C<br>(cont.) | Age                              | <i>daf-2(e1370);daf-16(mu86)</i><br>Control | <i>daf-2(e1370);daf-16(mu86)</i><br>Met (50mM) | P value | P value<br>sum |
|                    | AD1                              | 0.08711 ± 0.003383, n=6                     | 0.09554 ± 0.002473, n=6                        | 0.0722  | n.s.           |
|                    | AD10                             | 0.08019 ± 0.002696, n=6                     | 0.01352 ± 0.003483, n=6                        | <0.0001 | ****           |
| Fig S10B           | Time (h)                         | Control                                     | Met (50mM)                                     | P value | P value<br>sum |
|                    | 6                                | 1 ± 0.06715, n=10                           | 2.065 ± 0.1123, n=10                           | <0.0001 | ****           |
|                    | 12                               | 1 ± 0.02356, n=10                           | 1.952 ± 0.04245, n=10                          | <0.0001 | ****           |
|                    | 24                               | 1 ± 0.02469, n=10                           | 1.611 ± 0.02156, n=10                          | <0.0001 | ****           |
| Fig S10C           | Time (h)                         | Control                                     | Met (50mM)                                     | P value | P value<br>sum |
|                    | 6                                | 1 ± 0.01355, n=10                           | 1.275 ± 0.01568, n=10                          | <0.0001 | ****           |
|                    | 12                               | 1 ± 0.01584, n=10                           | 1.223 ± 0.01282, n=10                          | <0.0001 | ****           |
|                    | 24                               | 1 ± 0.009242, n=10                          | 1.244 ± 0.01333, n=10                          | <0.0001 | ****           |
| Fig S10D           | Time (h)                         | Control                                     | Met (50mM)                                     | P value | P value<br>sum |
|                    | 6                                | 6.2 ± 0.4163, n=10                          | 12.8 ± 0.696, n=10                             | <0.0001 | ****           |
|                    | 12                               | 14.5 ± 0.3416, n=10                         | 28.3 ± 0.6155, n=10                            | <0.0001 | ****           |
|                    | 24                               | 27 ± 0.6667, n=10                           | 43.5 ± 0.5821, n=10                            | <0.0001 | ****           |
| Fig S10E           | Time (h)                         | Control                                     | Met (50mM)                                     | P value | P value<br>sum |
|                    | 6                                | 37.8 ± 0.5121, n=10                         | 48.2 ± 0.5925, n=10                            | <0.0001 | ****           |
|                    | 12                               | 48 ± 0.7601, n=10                           | 58.7 ± 0.6155, n=10                            | <0.0001 | ****           |
|                    | 24                               | 58.6 ± 0.5416, n=10                         | 72.9 ± 0.781, n=10                             | <0.0001 | ****           |
| Fig S10F           | Time (h)                         | Control                                     | Met (50mM)                                     | P value | P value<br>sum |
|                    | 6                                | 6 ± 0.2582, n=10                            | 0.7 ± 0.2603, n=10                             | <0.0001 | ****           |
|                    | 12                               | 12.1 ± 0.2769, n=10                         | 0.7 ± 0.2603, n=10                             | <0.0001 | ****           |
|                    | 24                               | 19.3 ± 0.2603, n=10                         | 0.8 ± 0.2906, n=10                             | <0.0001 | ****           |
| Fig S11A           | Strain                           | Control                                     | Met (50mM)                                     | P value | P value<br>sum |
|                    | N2                               | 60.83 ± 2.288, n=30                         | 56.71 ± 2.228, n=30                            | 0.202   | n.s.           |
|                    | <i>aak-2</i><br>( <i>ok524</i> ) | 54.89 ± 2.842, n=30                         | 65.3 ± 2.378, n=30                             | 0.0067  | **             |
| Fig S11B           | RNAi                             | Control                                     | Met (50mM)                                     | P value | P value<br>sum |
|                    | EV                               | 33.77 ± 1.303, n=41                         | 28.22 ± 0.709, n=41                            | 0.0003  | ***            |
|                    | <i>kin-1</i>                     | 49.69 ± 1.969, n= 23                        | 44.43 ± 2.74, n=23                             | 0.1268  | n.s.           |
| Fig S11C           | Met (mM)                         | N2                                          | <i>aak-2 (ok524)</i>                           | P value | P value<br>sum |
|                    | 50                               | 33.15 ± 0.9861, n=30                        | 26.81 ± 0.9728, n=30                           | <0.0001 | ****           |
| Fig S11D           | Met (mM)                         | N2                                          | EV                                             | P value | P value<br>sum |
|                    | 50                               | 0.83 ± 0.0246, n=30                         | 0.66 ± 0.0166, n=39                            | <0.0001 | ****           |
|                    | Met (mM)                         | EV                                          | <i>atgl-1</i>                                  | P value | P value<br>sum |
|                    | 50                               | 0.66 ± 0.0166, n=39                         | 1.06 ± 0.268, n=31                             | <0.0001 | ****           |
| Fig S13A           | Lipid                            | AD1                                         | AD10                                           | P value | P value<br>sum |
|                    | PC                               | 118.5 ± 7.322, n=3                          | 100 ± 15.21, n=3                               | 0.3342  | n.s.           |
|                    | PE                               | 159 ± 11.6, n=3                             | 100 ± 18.72, n=3                               | 0.0553  | n.s.           |
|                    | PI                               | 183.6 ± 7.835, n=3                          | 100 ± 16.22, n=3                               | 0.0097  | **             |
|                    | FFA                              | 212.2 ± 7.167, n=3                          | 100 ± 20.98, n=3                               | 0.0072  | **             |

|                 |                      | Mean ± SEM, n           | Mean ± SEM, n          |                |                    |
|-----------------|----------------------|-------------------------|------------------------|----------------|--------------------|
| <b>Fig S13B</b> | <b>Lipid</b>         | <b>AD1</b>              | <b>AD10</b>            | <b>P value</b> | <b>P value sum</b> |
|                 | LPC /total PC        | 189.2 ± 6.208, n=3      | 100 ± 14.32, n=3       | 0.0046         | **                 |
|                 | LPE /total PE        | 281 ± 16.27, n=3        | 100 ± 17.51, n=3       | 0.0016         | **                 |
|                 | PUFA-LPC /total PC   | 405.2 ± 27.68, n=3      | 100 ± 13.36, n=3       | 0.0006         | ***                |
|                 | PUFA-LPE /total PE   | 1012 ± 116, n=3         | 100 ± 16.91, n=3       | 0.0015         | **                 |
| <b>Fig S13C</b> | <b>Age</b>           | <b>Control</b>          | <b>Met (50mM)</b>      | <b>P value</b> | <b>P value sum</b> |
|                 | AD1                  | 159 ± 11.6, n=3         | 124.1 ± 2.606, n=3     | 0.0425         | *                  |
|                 | AD10                 | 100 ± 18.72, n=3        | 90.16 ± 16.33, n=3     | 0.7123         | n.s.               |
| <b>Fig S13D</b> | <b>Age</b>           | <b>Control</b>          | <b>Met (50mM)</b>      | <b>P value</b> | <b>P value sum</b> |
|                 | AD1                  | 183.6 ± 7.835, n=3      | 146.7 ± 6.461, n=3     | 0.0221         | *                  |
|                 | AD10                 | 100 ± 16.22, n=3        | 99.84 ± 17.56, n=3     | 0.9951         | n.s.               |
| <b>Fig S13E</b> | <b>Met (mM)</b>      | <b>AD1</b>              | <b>AD10</b>            | <b>P value</b> | <b>P value sum</b> |
|                 | 0                    | 130.239 ± 18.714, n=3   | 100 ± 6.269, n=3       | 0.2002         | n.s.               |
|                 | 50                   | 91.188 ± 8.954, n=3     | 126.449 ± 13.040, n=3  | 0.0897         | n.s.               |
| <b>Fig S15A</b> | <b>Met (mM)</b>      | <b>Control</b>          | <b>Rap (50nM)</b>      | <b>P value</b> | <b>P value sum</b> |
|                 | 0                    | 1 ± 0.0188, n=3         | 0.8397 ± 0.03229, n=3  | 0.0127         | *                  |
|                 | 5                    | 1.099 ± 0.07941, n=3    | 0.8304 ± 0.02766, n=3  | 0.033          | *                  |
|                 | 7.5                  | 2.02 ± 0.1199, n=3      | 0.8699 ± 0.02726, n=3  | 0.0007         | ***                |
|                 | 10                   | 2.289 ± 0.01671, n=3    | 0.9019 ± 0.01359, n=3  | <0.0001        | ****               |
|                 | 20                   | 2.713 ± 0.07355, n=3    | 1.563 ± 0.02978, n=3   | 0.0001         | ***                |
|                 | <b>Met (mM)</b>      | <b>Control</b>          | <b>Rap (100nM)</b>     | <b>P value</b> | <b>P value sum</b> |
|                 | 0                    | 1 ± 0.0188, n=3         | 0.9314 ± 0.02885, n=3  | 0.1172         | n.s.               |
|                 | 5                    | 1.099 ± 0.07941, n=3    | 0.8873 ± 0.03309, n=3  | 0.0695         | n.s.               |
|                 | 7.5                  | 2.02 ± 0.1199, n=3      | 0.8521 ± 0.04219, n=3  | 0.0008         | ***                |
|                 | 10                   | 2.289 ± 0.01671, n=3    | 0.8591 ± 0.007147, n=3 | <0.0001        | ****               |
|                 | 20                   | 2.713 ± 0.07355, n=3    | 1.317 ± 0.07431, n=3   | 0.0002         | ***                |
|                 | <b>Met (mM)</b>      | <b>Control</b>          | <b>Rap (150nM)</b>     | <b>P value</b> | <b>P value sum</b> |
|                 | 0                    | 1 ± 0.0188, n=3         | 0.992 ± 0.03835, n=3   | 0.8605         | n.s.               |
|                 | 5                    | 1.099 ± 0.07941, n=3    | 0.9436 ± 0.01888, n=3  | 0.1295         | n.s.               |
| 7.5             | 2.02 ± 0.1199, n=3   | 0.938 ± 0.01577, n=3    | 0.0009                 | ***            |                    |
| 10              | 2.289 ± 0.01671, n=3 | 0.9335 ± 0.04864, n=3   | <0.0001                | ****           |                    |
| 20              | 2.713 ± 0.07355, n=3 | 1.546 ± 0.1186, n=3     | 0.0011                 | **             |                    |
| <b>Fig S15B</b> | <b>Met (mM)</b>      | <b>Control</b>          | <b>Rap (50nM)</b>      | <b>P value</b> | <b>P value sum</b> |
|                 | 0                    | 1 ± 0.05884, n=3        | 0.8101 ± 0.03397, n=3  | 0.049          | *                  |
|                 | 20                   | 0.06039 ± 0.005007, n=3 | 0.2882 ± 0.04144, n=3  | 0.0055         | **                 |
|                 | <b>Met (mM)</b>      | <b>Control</b>          | <b>Rap (100nM)</b>     | <b>P value</b> | <b>P value sum</b> |
|                 | 0                    | 1 ± 0.05884, n=3        | 0.7697 ± 0.02058, n=3  | 0.021          | *                  |
|                 | 20                   | 0.06039 ± 0.005007, n=3 | 0.3101 ± 0.007201, n=3 | <0.0001        | ****               |

|                         |                 | Mean ± SEM, n           | Mean ± SEM, n           |                        |                    |                    |
|-------------------------|-----------------|-------------------------|-------------------------|------------------------|--------------------|--------------------|
| <b>Fig S15B (cont.)</b> | <b>Met (mM)</b> | <b>Control</b>          | <b>Rap (150nM)</b>      | <b>P value</b>         | <b>P value sum</b> |                    |
|                         | 0               | 1 ± 0.05884, n=3        | 0.7933 ± 0.02631, n=3   | 0.0327                 | *                  |                    |
|                         | 20              | 0.06039 ± 0.005007, n=3 | 0.3218 ± 0.1069, n=3    | 0.071                  | n.s.               |                    |
| <b>Fig S15C</b>         | <b>Met (mM)</b> | <b>Control</b>          | <b>Rap (50nM)</b>       | <b>P value</b>         | <b>P value sum</b> |                    |
|                         | 0               | 1 ± 0.09015, n=3        | 0.9685 ± 0.03405, n=3   | 0.7603                 | n.s.               |                    |
|                         | 20              | 0.01036 ± 0.001361, n=3 | 0.03847 ± 0.005249, n=3 | 0.0066                 | **                 |                    |
|                         | <b>Met (mM)</b> | <b>Control</b>          | <b>Rap (100nM)</b>      | <b>P value</b>         | <b>P value sum</b> |                    |
|                         | 0               | 1 ± 0.09015, n=3        | 0.9646 ± 0.02229, n=3   | 0.7224                 | n.s.               |                    |
|                         | 20              | 0.01036 ± 0.001361, n=3 | 0.04785 ± 0.01236, n=3  | 0.0394                 | *                  |                    |
|                         | <b>Met (mM)</b> | <b>Control</b>          | <b>Rap (150nM)</b>      | <b>P value</b>         | <b>P value sum</b> |                    |
|                         | 0               | 1 ± 0.09015, n=3        | 0.8859 ± 0.0194, n=3    | 0.2836                 | n.s.               |                    |
|                         | 20              | 0.01036 ± 0.001361, n=3 | 0.03054 ± 0.001553, n=3 | 0.0006                 | ***                |                    |
|                         | <b>Fig S15D</b> | <b>Met (mM)</b>         | <b>Control</b>          | <b>Rap (50nM)</b>      | <b>P value</b>     | <b>P value sum</b> |
|                         |                 | 0                       | 1 ± 0.02445, n=3        | 1.187 ± 0.03374, n=3   | 0.0109             | *                  |
|                         |                 | 20                      | 0.1539 ± 0.007738, n=3  | 0.2106 ± 0.001811, n=3 | 0.002              | **                 |
| <b>Met (mM)</b>         |                 | <b>Control</b>          | <b>Rap (100nM)</b>      | <b>P value</b>         | <b>P value sum</b> |                    |
| 0                       |                 | 1 ± 0.02445, n=3        | 1.213 ± 0.01183, n=3    | 0.0014                 | **                 |                    |
| 20                      |                 | 0.1539 ± 0.007738, n=3  | 0.2159 ± 0.00123, n=3   | 0.0014                 | **                 |                    |
| <b>Met (mM)</b>         |                 | <b>Control</b>          | <b>Rap (150nM)</b>      | <b>P value</b>         | <b>P value sum</b> |                    |
| 0                       |                 | 1 ± 0.02445, n=3        | 1.271 ± 0.01996, n=3    | 0.001                  | **                 |                    |
| 20                      |                 | 0.1539 ± 0.007738, n=3  | 0.2506 ± 0.005984, n=3  | 0.0006                 | ***                |                    |

1

1 **Table S3. Proteomics data analysis (separate file).**

2 The first tab of the table shows individual fold changes of all proteins measured in  
3 metformin treated samples relative to the age and time point matched untreated control;  
4 statistical values are included in each case and the fold changes are color-coded.  
5 Individual tabs summarize protein identities and statistical values used to generate the  
6 corresponding figures; the last (to the right) column of the tab depicts the assignment of  
7 proteins to distinct pathway groups. Tab 4 depicts an independent experiment  
8 performed in order to assess the mitochondrial content in respective genetic  
9 backgrounds.

10 **Table S4. Lipidomics data analysis (separate file).**

11 The table lists all raw intensities used and explains the calculations which connect these  
12 values to presented figures.

13 **Supplementary references:**

14 Artal-Sanz, M., and Tavernarakis, N. (2009). Prohibitin couples diapause signalling to  
15 mitochondrial metabolism during ageing in *C. elegans*. *Nature* 461, 793-797.

16  
17 Han, S., Schroeder, E.A., Silva-Garcia, C.G., Hebestreit, K., Mair, W.B., and Brunet, A. (2017).  
18 Mono-unsaturated fatty acids link H3K4me3 modifiers to *C. elegans* lifespan. *Nature* 544, 185-  
19 190.

20  
21 Koeberle, A., Pergola, C., Shindou, H., Koeberle, S.C., Shimizu, T., Laufer, S.A., and Werz, O.  
22 (2015). Role of p38 mitogen-activated protein kinase in linking stearyl-CoA desaturase-1  
23 activity with endoplasmic reticulum homeostasis. *FASEB J* 29, 2439-2449.

24  
25 Koeberle, A., Shindou, H., Koeberle, S.C., Laufer, S.A., Shimizu, T., and Werz, O. (2013).  
26 Arachidonoyl-phosphatidylcholine oscillates during the cell cycle and counteracts proliferation  
27 by suppressing Akt membrane binding. *Proceedings of the National Academy of Sciences of the*  
28 *United States of America* 110, 2546-2551.

29
